# Supplementary material
Source: publisher figshare collection journal article supplement (https://gsajournals.figshare.com/articles/dataset/_/12268739)

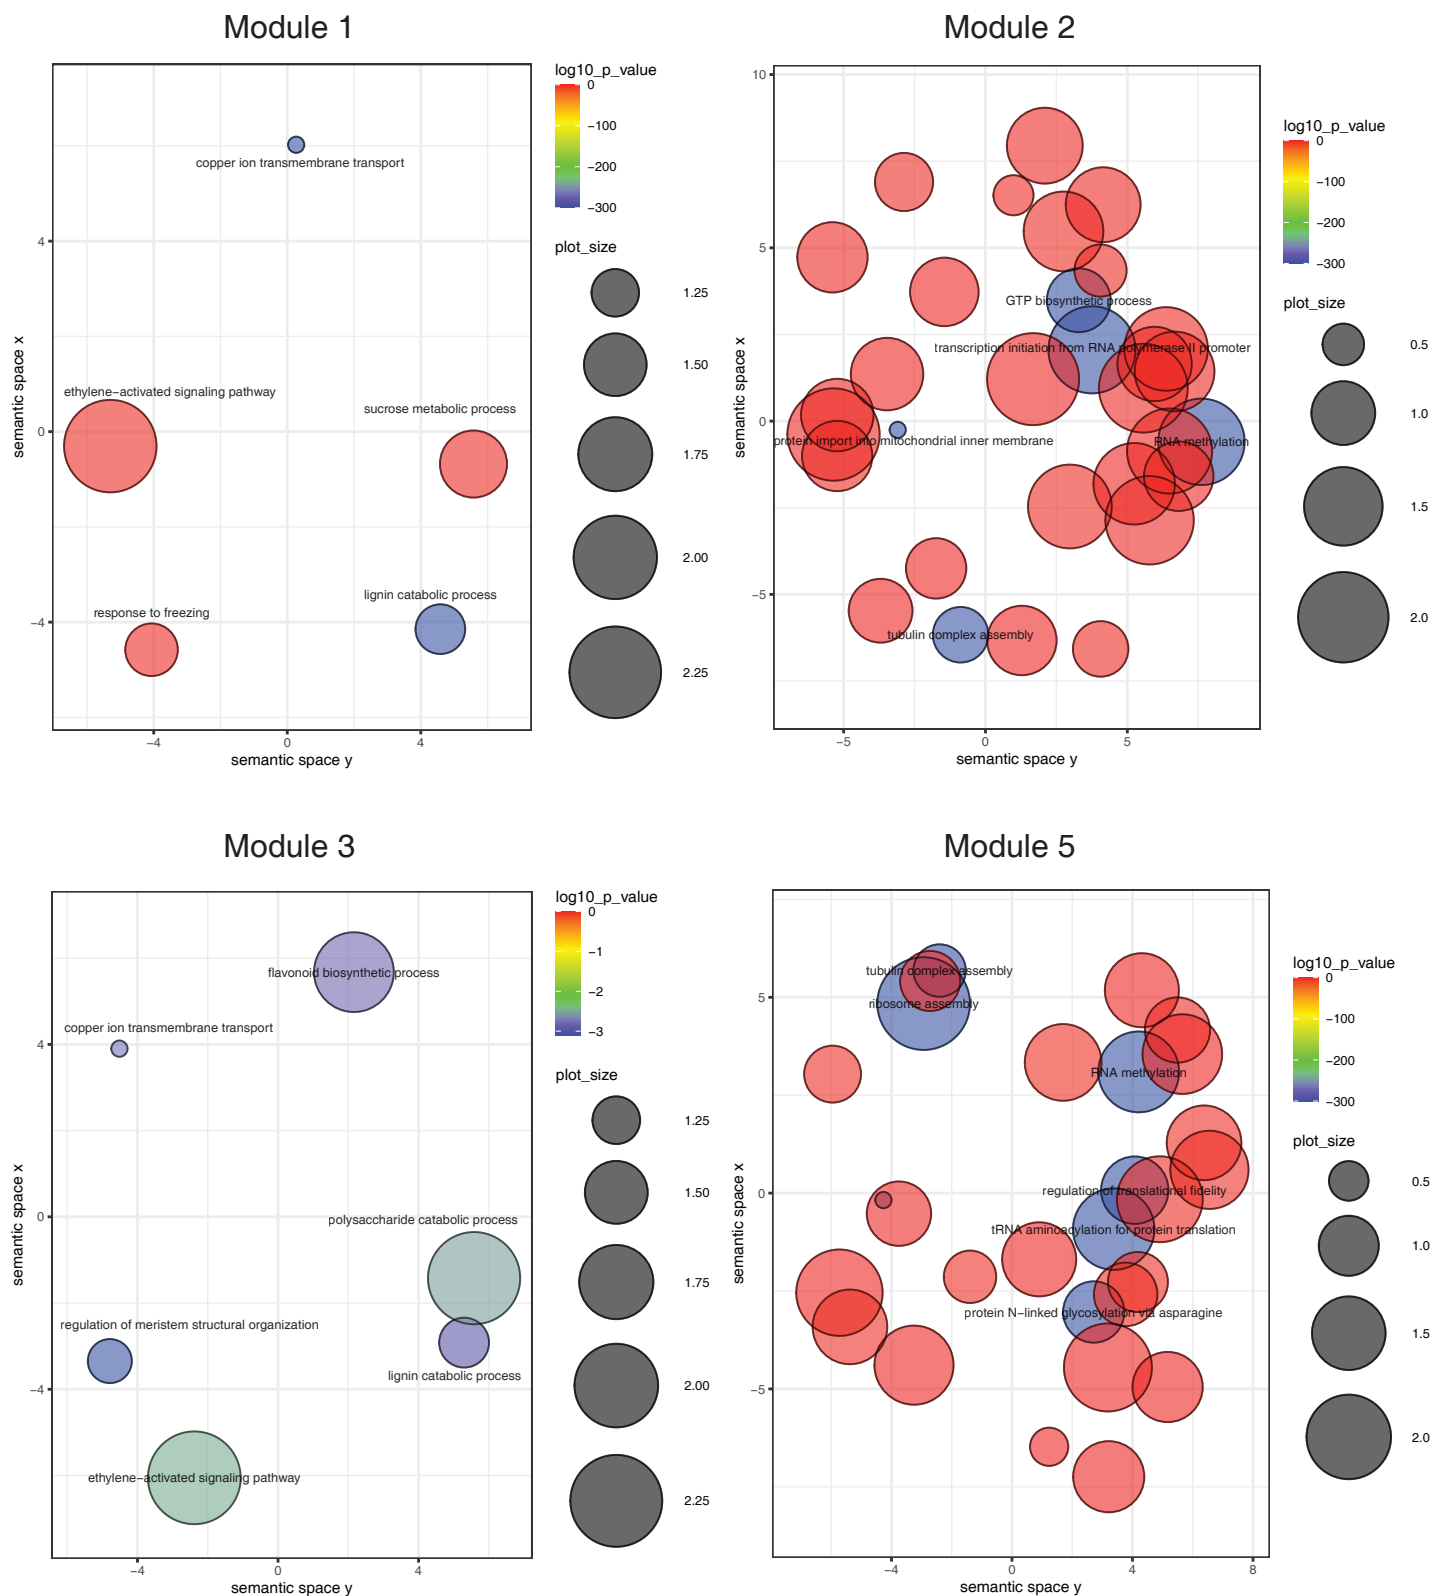

Figure S2: Biological Processes GO Term enrichment visualized using REVIGO. Modules significantly associated with fiber development were plotted. Color corresponds to  $\log_{10}$  p-value. Size of circles corresponds to the log size of the GO term within the *Arabidopsis thaliana* GO term database. Labels were reduced for clarity where necessary. A full list of GO Term enrichment by module can be found in Table S4.

### Module 6

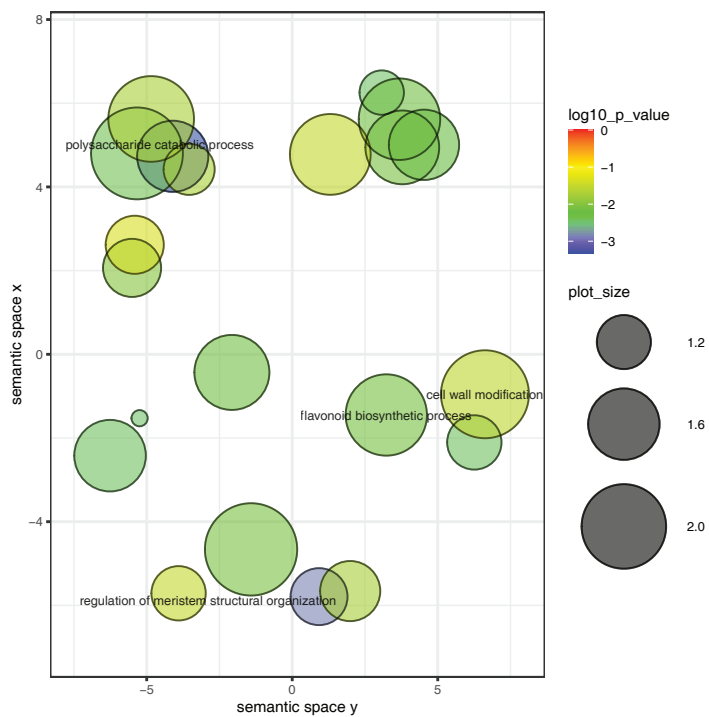

### Module 7

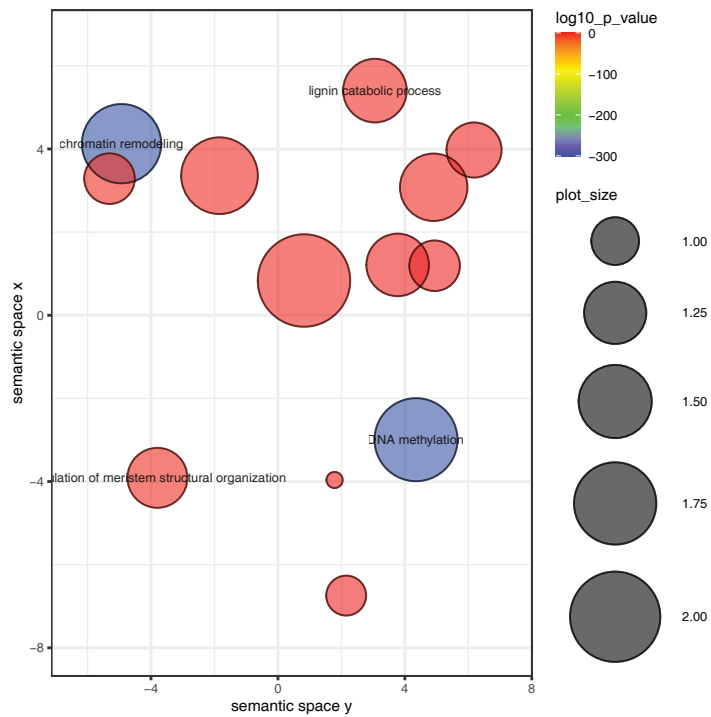

### Module 8

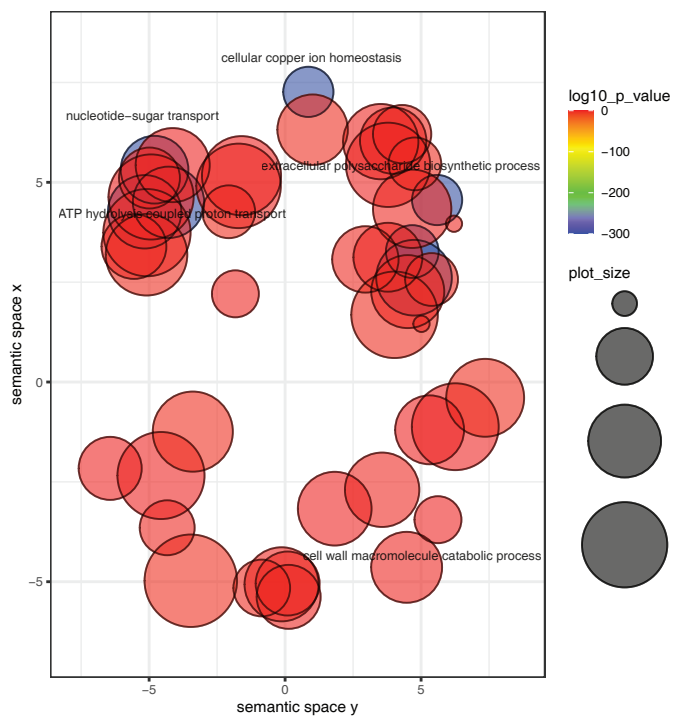

### Module 9

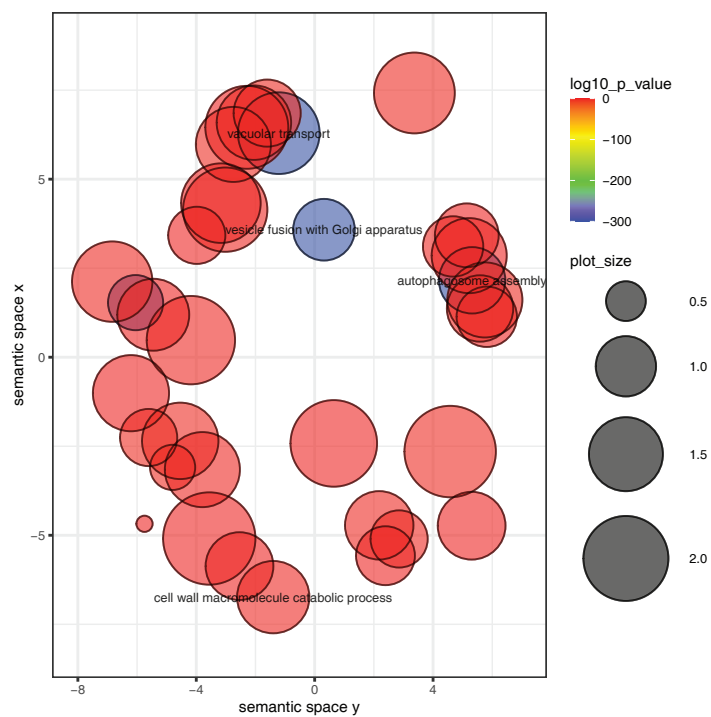

Module 10

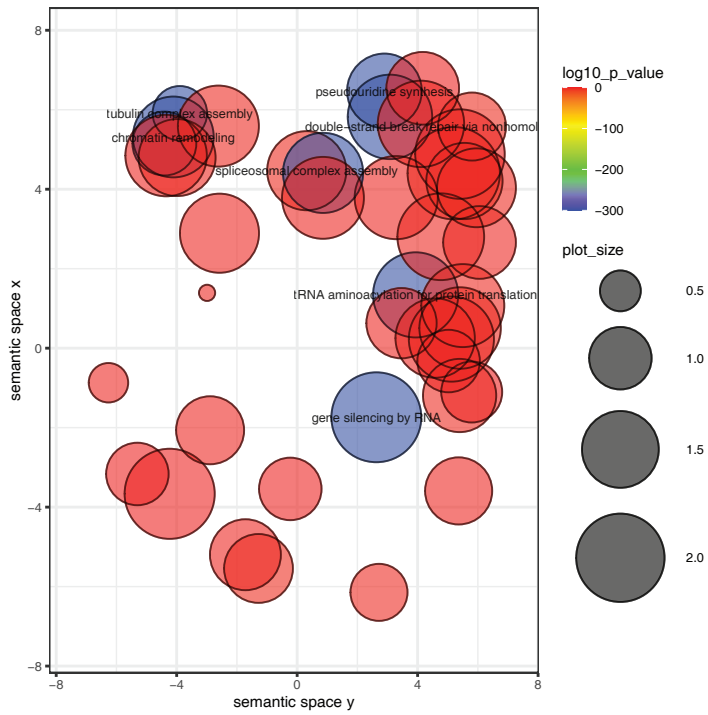

Module 11

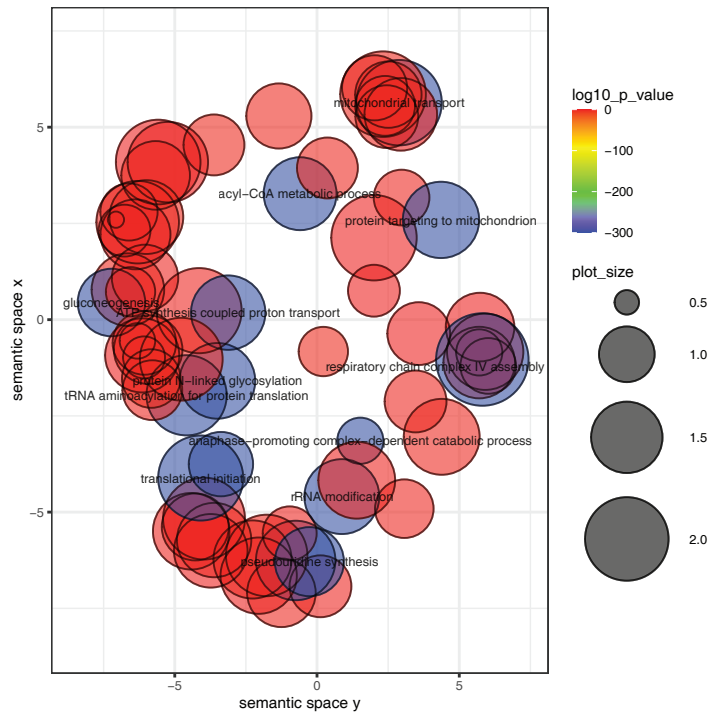

Module 12

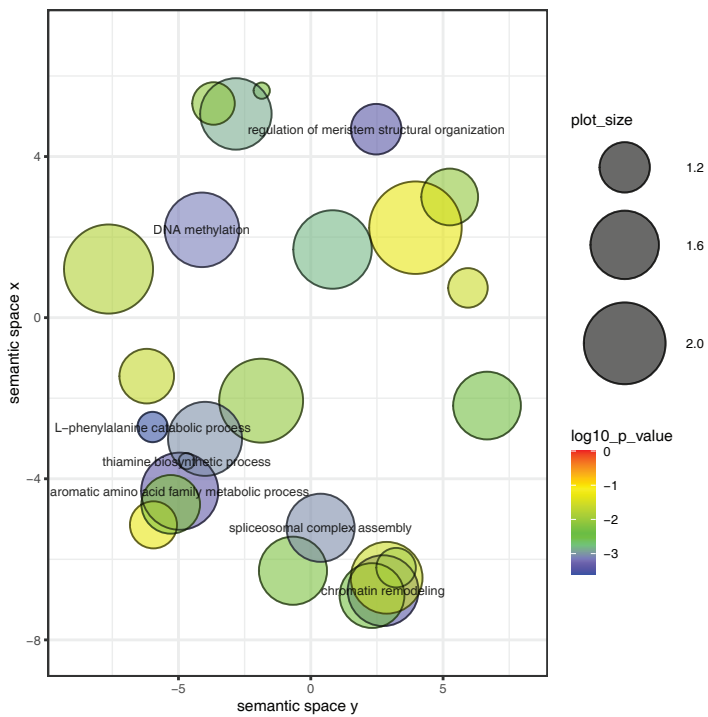

Module 13

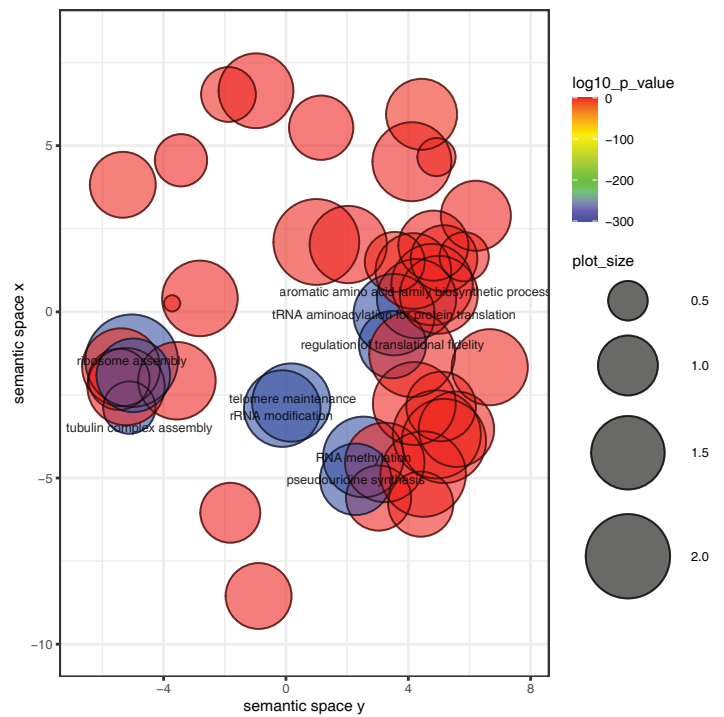

Module 14

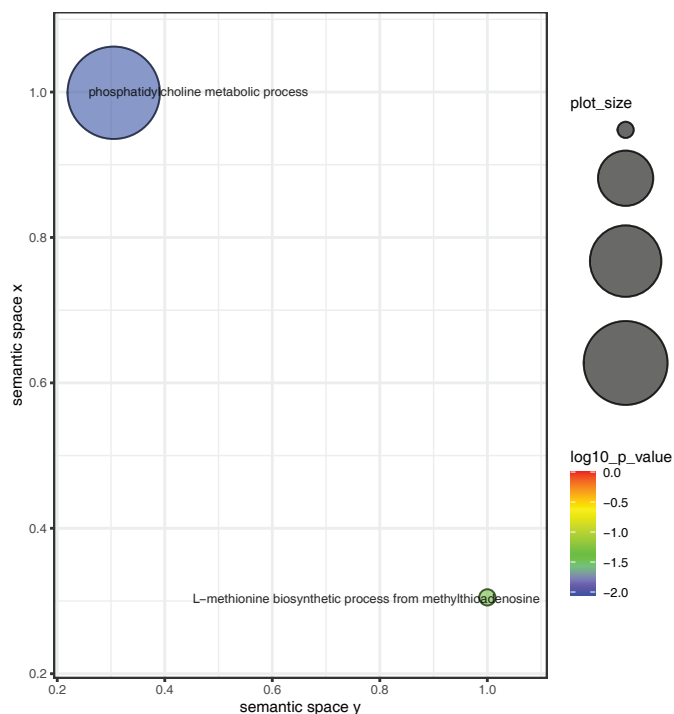

Module 15

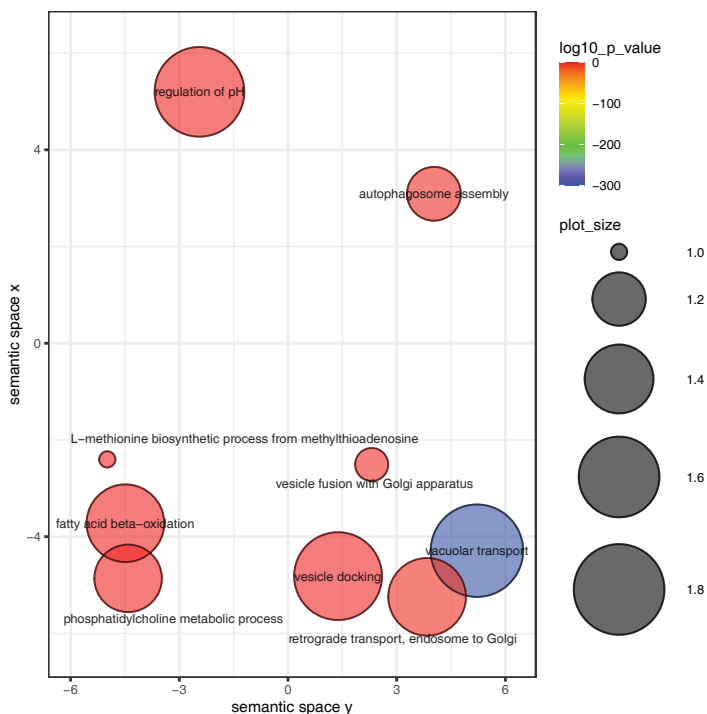

Module 16

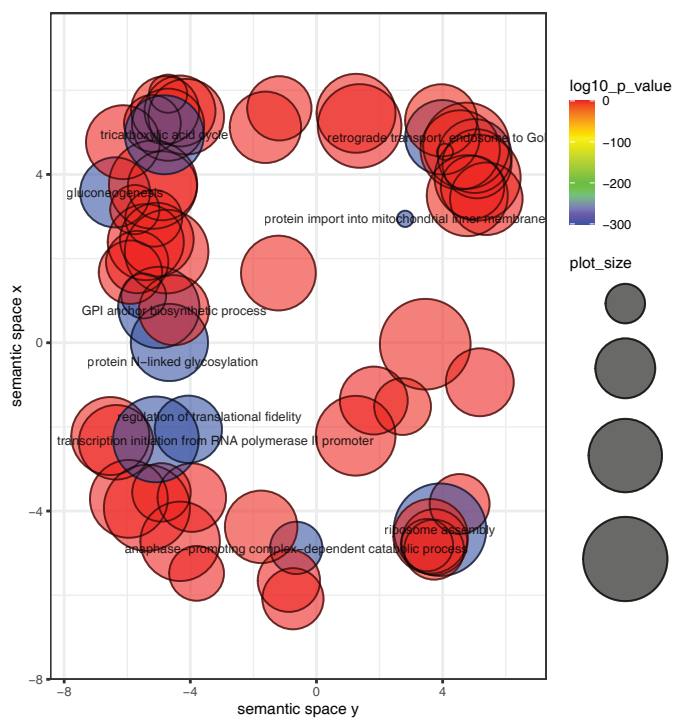

Module 17

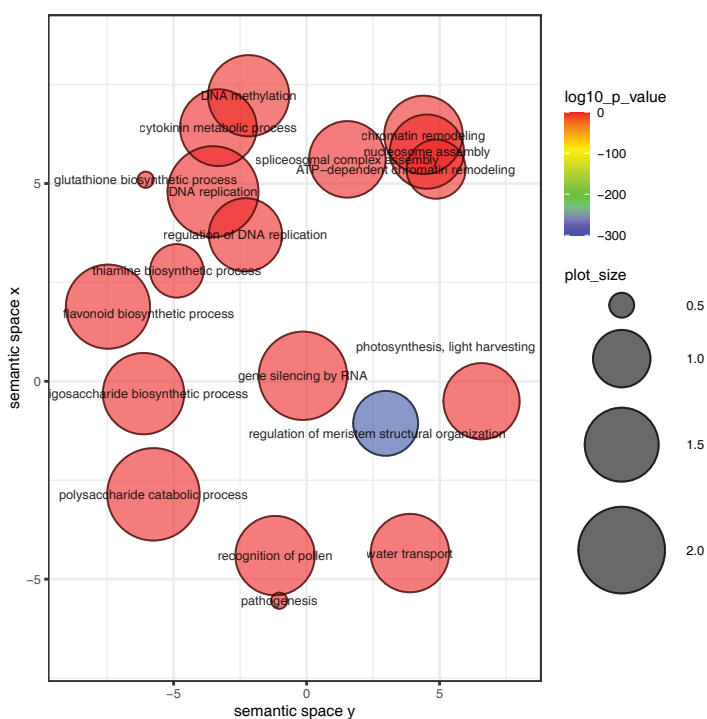

Module 18

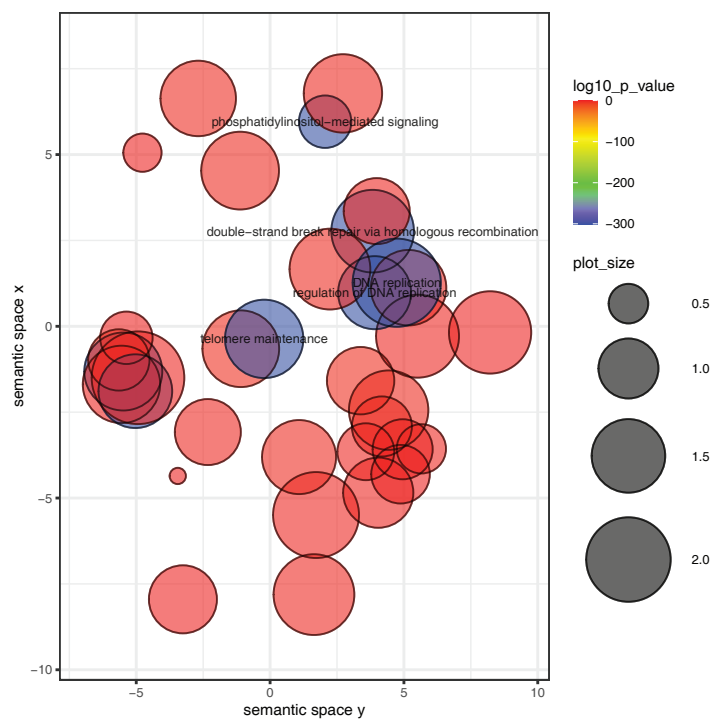

Module 19

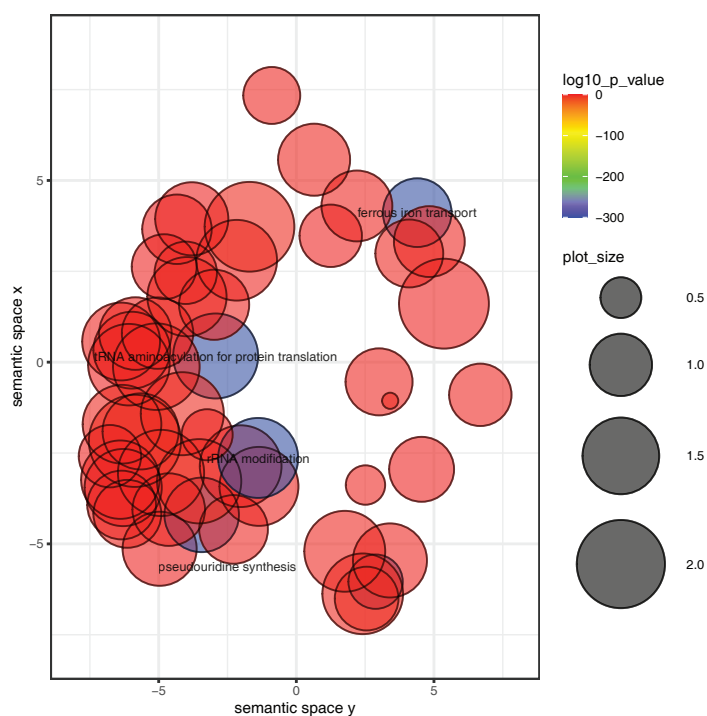

Module 21

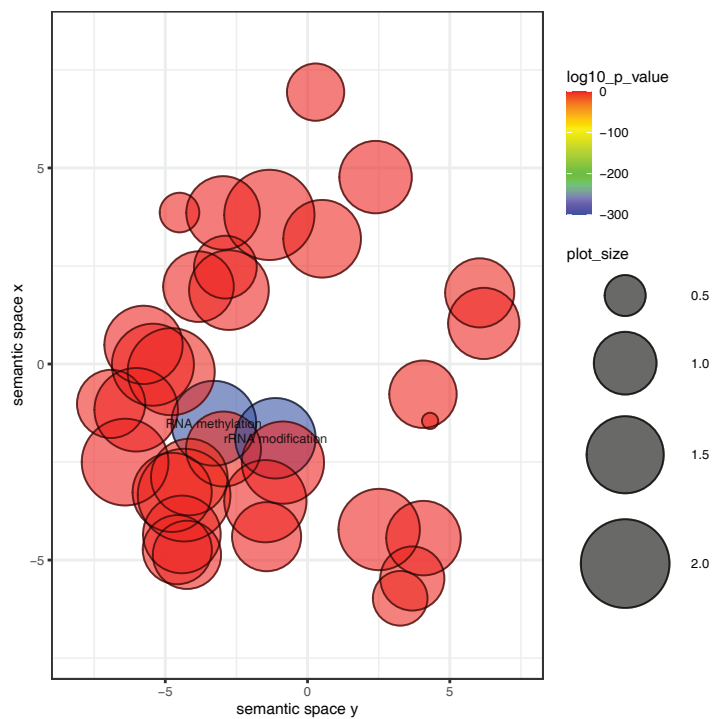

Module 23

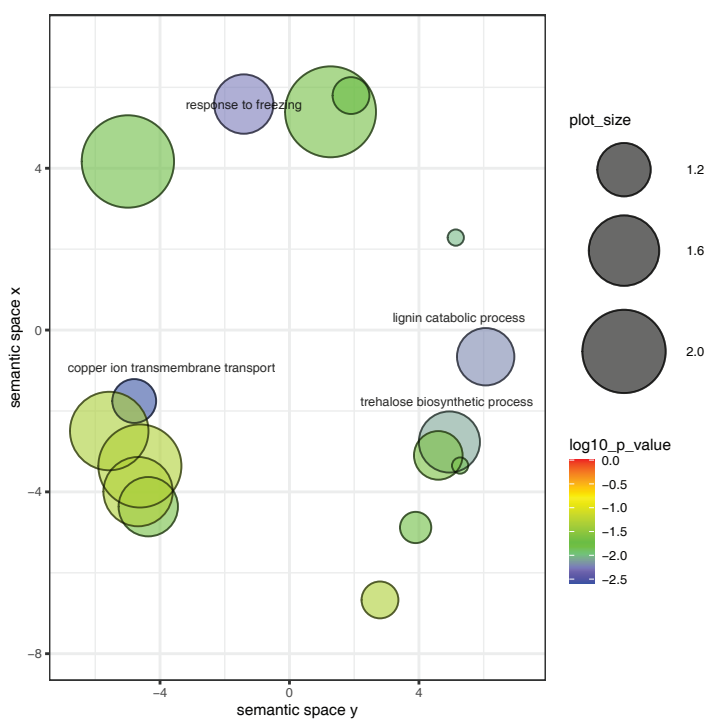

Module 25

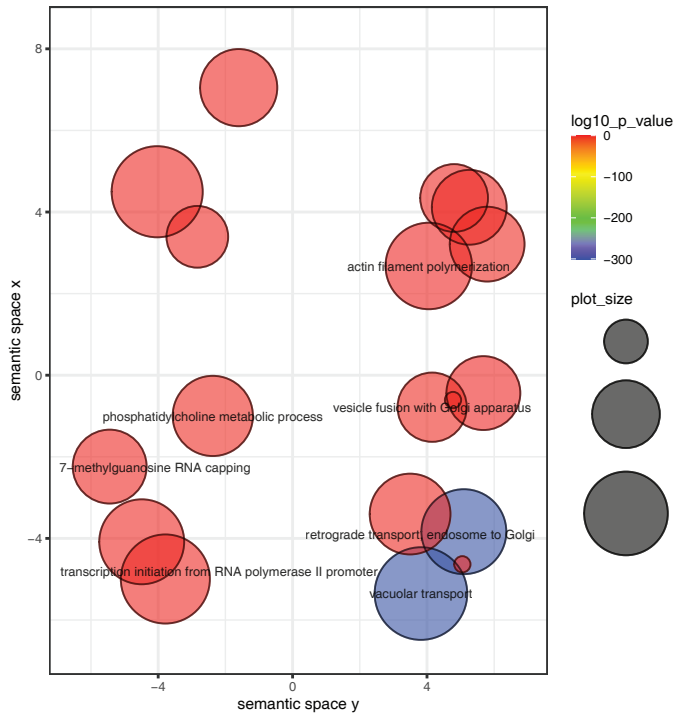

Module 28

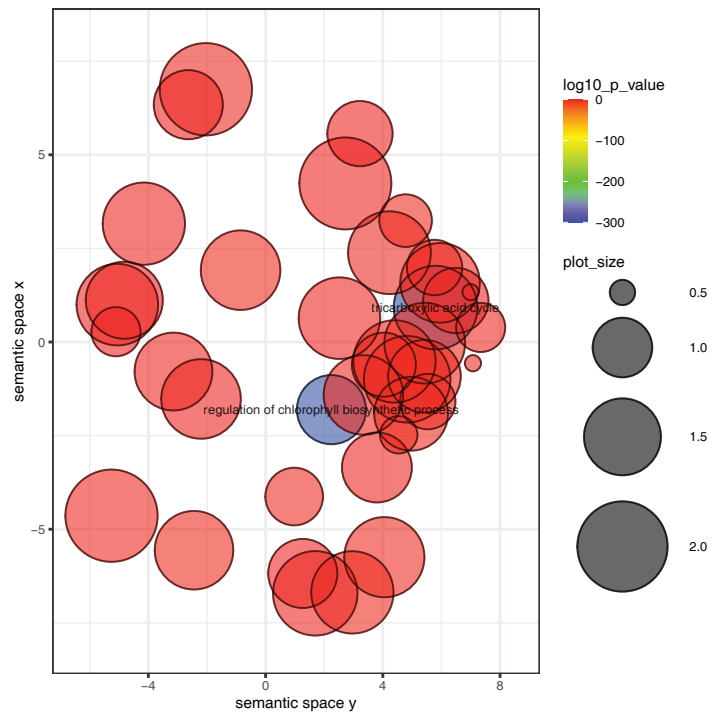

Module 33

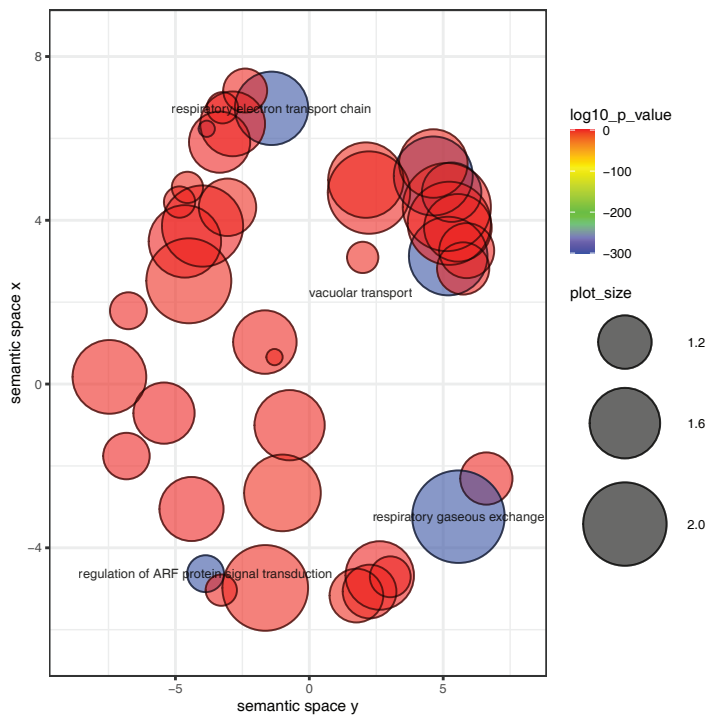

Module 37

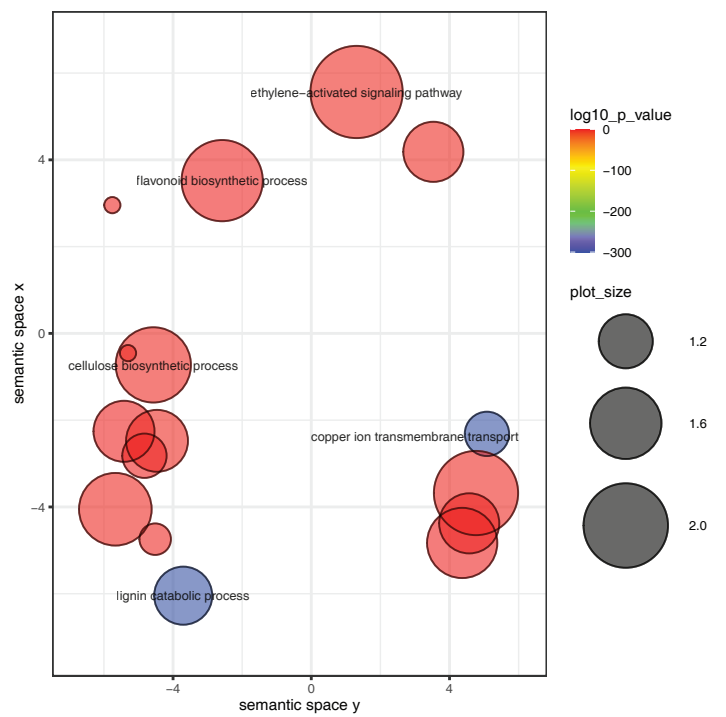

Module 41

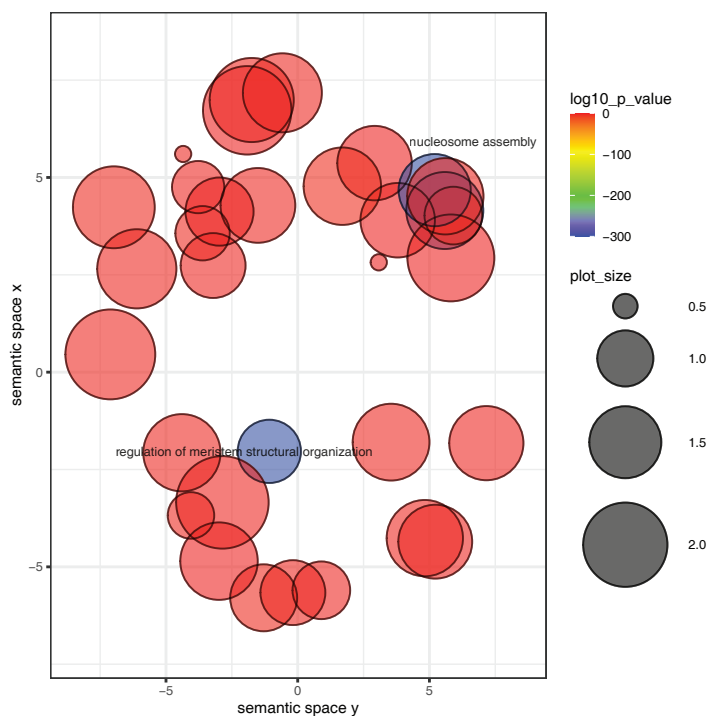

Module 44

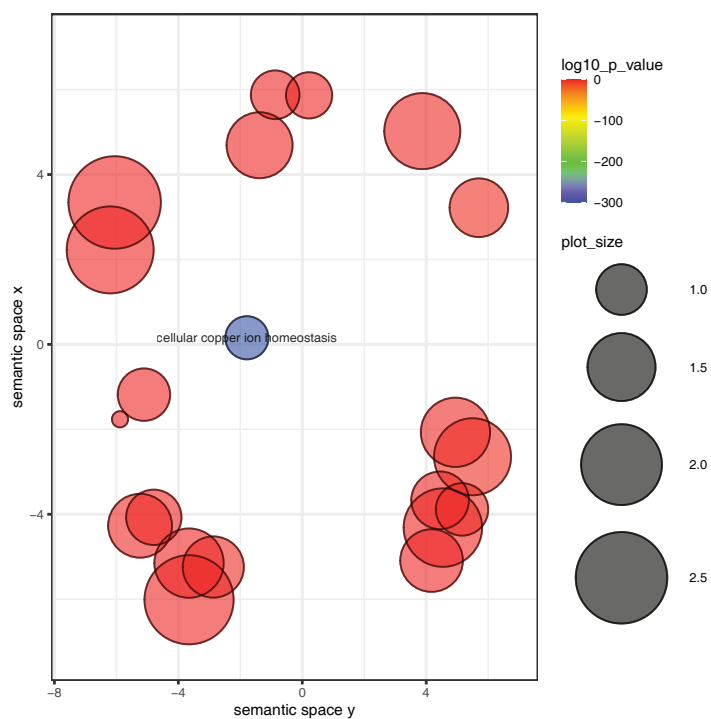

Module 46

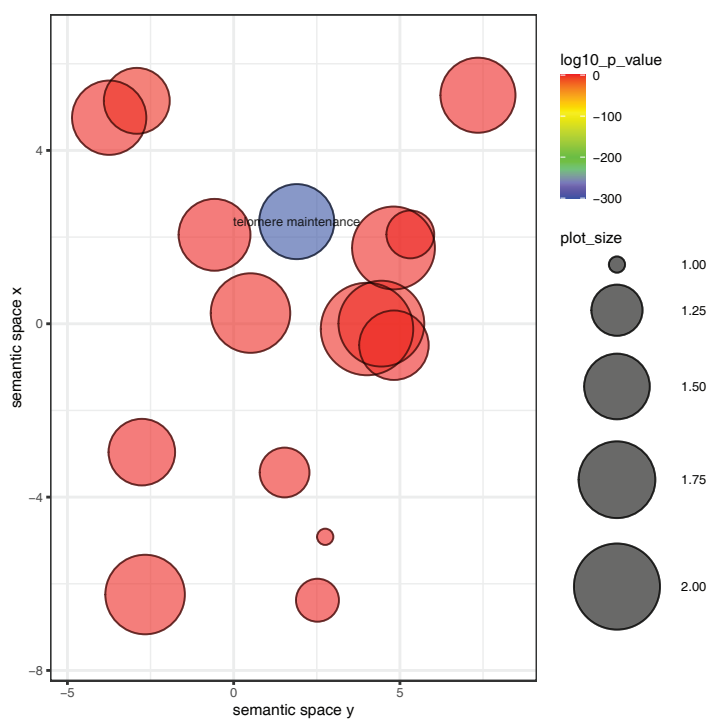

Module 52

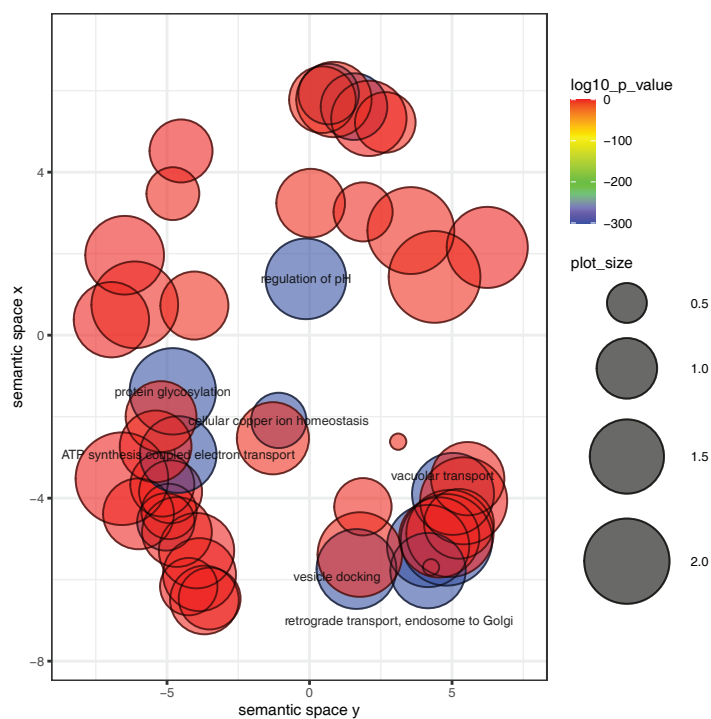

Supplement: Supplementary file 4 [file 1]
