# Supplementary material
Source: publisher figshare collection journal article supplement (https://gsajournals.figshare.com/articles/dataset/_/12268739)
Supplement: Supplementary file 1 [file 1]

## Sheet: Sheet1
Table S7: Genes that were both differentially expressed and differentially coexpressed.
Gene ID	Homoeologous Network Module	Domesticated Network Module	Wild Network Module	Annotation	GO Terms	Arabidopsis thaliana homolog	Abbreviation
Gorai.001G000900_A	2	1	2	cell division control 2	GO:0004672,GO:0005524,GO:0006468	AT3G48750.1	CDC2,CDC2A,CDC2AAT,CDK2,CDKA1,CDKA;1
Gorai.001G000900_D	2	1	2	cell division control 2	GO:0004672,GO:0005524,GO:0006468	AT3G48750.1	CDC2,CDC2A,CDC2AAT,CDK2,CDKA1,CDKA;1
Gorai.001G001200_A	1	2	1	Protein kinase superfamily protein	GO:0004672,GO:0005524,GO:0006468	AT4G31170.1
Gorai.001G002400_A	9	2	27	PPPDE putative thiol peptidase family protein		AT4G17486.1
Gorai.001G002400_D	9	2	20	PPPDE putative thiol peptidase family protein		AT4G17486.1
Gorai.001G002700_A	1	2	1	K+ transporter 1	GO:0005515,GO:0005216,GO:0006811,GO:0055085,GO:0016020	AT2G26650.1	AKT1,ATAKT1,KT1
Gorai.001G003100_D	5	1	12	pleiotropic drug resistance 10	GO:0005524,GO:0016887,GO:0016020	AT3G30842.1	ATPDR10,PDR10
Gorai.001G003300_A	1	9	1	fatty acyl-ACP thioesterases B	GO:0016790,GO:0006633	AT1G08510.1	FATB
Gorai.001G004400_D	1	2	1	aldehyde dehydrogenase 2C4	GO:0016491,GO:0008152,GO:0055114	AT3G24503.1	ALDH1A,ALDH2C4,REF1
Gorai.001G004500_A	1	11	1	FRIGIDA-like protein		AT3G22440.1
Gorai.001G004800_A	2	1	2	Late embryogenesis abundant (LEA) hydroxyproline-rich glycoprotein family		AT4G13270.1
Gorai.001G005500_A	1	2	1			AT5G19540.1
Gorai.001G005500_D	22	6	4			AT5G19540.1
Gorai.001G006800_D	15	19	12
Gorai.001G007100_A	2	1	2	Pyridine nucleotide-disulphide oxidoreductase family protein	GO:0016491,GO:0055114	AT4G32360.1
Gorai.001G007600_D	3	3	1	protein serine/threonine phosphatases;protein kinases;catalytics;cAMP-dependent protein kinase regulators;ATP binding;protein serine/threonine phosphatases	GO:0004672,GO:0005524,GO:0006468,GO:0003824	AT2G20050.1
Gorai.001G008000_D	5	1	2	alpha/beta-Hydrolases superfamily protein	GO:0008374,GO:0006629,GO:0004607	AT2G44970.1
Gorai.001G009500_A	6	2	10
Gorai.001G009900_A	2	1	2	Zinc finger C-x8-C-x5-C-x3-H type family protein	GO:0003676,GO:0008270	AT4G29190.1
Gorai.001G010800_D	16	9	21			AT4G29520.1
Gorai.001G010900_D	2	1	2			AT5G11780.1
Gorai.001G011100_D	1	2	44	ACC oxidase 1	GO:0016491,GO:0016706,GO:0055114	AT2G19590.1	ACO1,ATACO1
Gorai.001G011300_A	2	1	2	Transducin family protein / WD-40 repeat family protein	GO:0005515	AT2G19540.1
Gorai.001G011600_A	1	2	1	beta-galactosidase 12	GO:0004553,GO:0005975,GO:0004565,GO:0009341	AT4G26140.1	BGAL12
Gorai.001G011700_A	1	2	3			AT3G60310.1
Gorai.001G011800_A	17	3	11	polyamine oxidase 5	GO:0016491,GO:0055114	AT4G29720.1	ATPAO5,PAO5
Gorai.001G012100_D	1	2	1			AT5G56980.1
Gorai.001G012200_A	2	1	6	Translation initiation factor SUI1 family protein	GO:0003743,GO:0006413	AT5G11900.1
Gorai.001G012200_D	5	1	21	Translation initiation factor SUI1 family protein	GO:0003743,GO:0006413	AT5G11900.1
Gorai.001G012400_A	51	6	1	basic helix-loop-helix (bHLH) DNA-binding family protein	GO:0030528,GO:0006355	AT5G56960.1
Gorai.001G013100_D	1	2	1	membrane bound O-acyl transferase (MBOAT) family protein		AT2G19450.1	ABX45,AS11,ATDGAT,DGAT1,RDS1,TAG1
Gorai.001G013600_A	1	2	1	MAP kinase kinase 2	GO:0004672,GO:0005524,GO:0006468	AT4G29810.1	ATMKK2,MK1,MKK2
Gorai.001G013800_A	1	2	19	Ribosomal protein L18ae family	GO:0006412,GO:0005840,GO:0003735	AT4G26060.1
Gorai.001G014300_A	9	6	20	SNF7 family protein	GO:0015031	AT2G06530.1	VPS2.1
Gorai.001G015100_D	5	1	12	Stress responsive alpha-beta barrel domain protein		AT2G31670.1
Gorai.001G015300_D	10	1	15	binding	GO:0005515	AT2G06210.1	ELF8,VIP6
Gorai.001G015500_D	1	2	1			AT5G21940.1
Gorai.001G016100_A	1	2	3	Small nuclear ribonucleoprotein family protein		AT3G14080.1
Gorai.001G017100_A	2	1	2	ARM repeat superfamily protein		AT2G34357.1
Gorai.001G017100_D	2	1	2	ARM repeat superfamily protein		AT2G34357.1
Gorai.001G017500_D	13	0	2	SAUR-like auxin-responsive protein family		AT3G43120.1
Gorai.001G017600_A	14	3	15	SAUR-like auxin-responsive protein family		AT5G20820.1
Gorai.001G017800_D	2	1	2	Phosphoinositide phosphatase family protein	GO:0042578	AT3G43220.1
Gorai.001G018400_D	2	1	2	Haloacid dehalogenase-like hydrolase (HAD) superfamily protein	GO:0016791	AT4G33140.1
Gorai.001G018800_A	1	2	1	jasmonate-zim-domain protein 12	GO:0005515	AT5G20900.1	JAZ12,TIFY3B
Gorai.001G018800_D	1	2	1	jasmonate-zim-domain protein 12	GO:0005515	AT5G20900.1	JAZ12,TIFY3B
Gorai.001G018900_A	8	2	22	Transmembrane proteins 14C	GO:0016020	AT3G43520.1
Gorai.001G019300_A	1	2	1	Protein of unknown function (DUF1677)		AT1G72510.1
Gorai.001G019600_A	4	4	7	Chalcone-flavanone isomerase family protein	GO:0016872,GO:0042398	AT2G26310.1
Gorai.001G020900_A	2	1	2	mechanosensitive channel of small conductance-like 10	GO:0055085,GO:0016020	AT5G12080.1	ATMSL10,MSL10
Gorai.001G021100_A	1	2	1	Nitrilase/cyanide hydratase and apolipoprotein N-acyltransferase family protein	GO:0016810,GO:0006807	AT5G12040.1
Gorai.001G022400_A	35	5	6	calmodulin-binding family protein		AT4G33050.3	EDA39
Gorai.001G022400_D	35	6	31	calmodulin-binding family protein		AT4G33050.3	EDA39
Gorai.001G022900_D	1	6	1	Protein of unknown function (DUF778)		AT2G26070.1	RTE1
Gorai.001G023500_A	8	9	27	NADH-ubiquinone oxidoreductase 20 kDa subunit, mitochondrial	GO:0008137,GO:0048038,GO:0051539,GO:0055114,GO:0016651	AT5G11770.1
Gorai.001G023500_D	8	9	27	NADH-ubiquinone oxidoreductase 20 kDa subunit, mitochondrial	GO:0008137,GO:0048038,GO:0051539,GO:0055114,GO:0016651	AT5G11770.1
Gorai.001G023600_A	25	1	97			AT3G20430.1
Gorai.001G023700_A	1	2	1	gamma vacuolar processing enzyme	GO:0004197,GO:0006508	AT4G32940.1	GAMMA-VPE,GAMMAVPE
Gorai.001G023700_D	9	2	10	gamma vacuolar processing enzyme	GO:0004197,GO:0006508	AT4G32940.1	GAMMA-VPE,GAMMAVPE
Gorai.001G024500_A	19	1	2		GO:0006450	AT4G32915.1
Gorai.001G024900_D	11	7	70	ataurora1	GO:0004672,GO:0005524,GO:0006468	AT4G32830.1	AtAUR1,AUR1
Gorai.001G025000_A	1	2	1	phosphofructokinase 3	GO:0003872,GO:0006096,GO:0005945	AT4G26270.1	PFK3
Gorai.001G025100_D	27	2	16	vacuolar ATP synthase catalytic subunit-related / V-ATPase-related / vacuolar proton pump-related		AT1G16820.1
Gorai.001G025600_A	9	2	69	early nodulin-related		AT5G25940.1
Gorai.001G025600_D	24	6	9	early nodulin-related		AT5G25940.1
Gorai.001G025800_A	25	2	36	early nodulin-related		AT5G25940.1
Gorai.001G026900_A	1	2	1	Regulator of chromosome condensation (RCC1) family protein		AT5G11580.1
Gorai.001G026900_D	16	5	2	Regulator of chromosome condensation (RCC1) family protein		AT5G11580.1
Gorai.001G027600_A	7	18	1	embryonic flower 1 (EMF1)		AT5G11530.1	EMF1
Gorai.001G027700_D	10	1	5	embryonic flower 1 (EMF1)		AT5G11530.1	EMF1
Gorai.001G028100_D	1	9	10	aspartate aminotransferase 3	GO:0016740,GO:0030170,GO:0009058,GO:0016769,GO:0008483,GO:0006520	AT5G11520.1	ASP3,YLS4
Gorai.001G028200_A	10	1	25	Homeodomain-like protein	GO:0003677	AT4G32730.2	ATMYB3R-1,ATMYB3R1,MYB3R-1,MYB3R1,PC-MYB1
Gorai.001G028600_D	16	15	2			AT5G11500.1
Gorai.001G029300_D	12	3	42			AT4G32680.1
Gorai.001G029400_A	4	4	60	potassium channel in Arabidopsis thaliana 3	GO:0005216,GO:0006811,GO:0055085,GO:0016020	AT4G32650.3	ATKC1,AtLKT1,KAT3,KC1
Gorai.001G029800_D	5	1	29	Protein of unknown function (DUF1336)		AT5G35180.2
Gorai.001G029900_D	16	5	2	Ribosomal protein L39 family protein	GO:0003735,GO:0006412,GO:0005622,GO:0005840	AT4G31985.1
Gorai.001G030000_A	9	2	87	Glycosyl hydrolase family protein with chitinase insertion domain	GO:0004553,GO:0005975	AT4G19810.1
Gorai.001G030000_D	3	2	13	Glycosyl hydrolase family protein with chitinase insertion domain	GO:0004553,GO:0005975	AT4G19810.1
Gorai.001G030500_A	1	2	1	alpha/beta-Hydrolases superfamily protein		AT4G31020.1
Gorai.001G030600_A	2	1	11	response regulator 12	GO:0000156,GO:0000160,GO:0006355,GO:0003677	AT2G25180.1	ARR12,RR12
Gorai.001G030700_A	22	2	16	Protein of unknown function (DUF1068)		AT2G24290.1
Gorai.001G031100_A	2	12	5	temperature-induced lipocalin	GO:0005488	AT5G58070.1	ATTIL,TIL
Gorai.001G032700_A	2	1	2	Uncharacterised BCR, YbaB family COG0718		AT2G24020.2
Gorai.001G033600_D	25	2	19	TPX2 (targeting protein for Xklp2) protein family		AT4G32330.2
Gorai.001G033700_D	22	6	1			AT3G11760.1
Gorai.001G033900_A	1	2	1	epsin N-terminal homology (ENTH) domain-containing protein / clathrin assembly protein-related	GO:0005543	AT2G25430.1
Gorai.001G033900_D	1	2	1	epsin N-terminal homology (ENTH) domain-containing protein / clathrin assembly protein-related	GO:0005543	AT2G25430.1
Gorai.001G034400_A	1	2	1
Gorai.001G034500_A	3	12	1	Myosin heavy chain-related protein		AT4G32190.1
Gorai.001G035000_A	1	2	1	EamA-like transporter family	GO:0016020	AT4G32140.1
Gorai.001G035000_D	1	2	1	EamA-like transporter family	GO:0016020	AT4G32140.1
Gorai.001G035100_A	16	2	49	Protein of unknown function (DUF2012)		AT2G25310.1
Gorai.001G035100_D	8	5	2	Protein of unknown function (DUF2012)		AT2G25310.1
Gorai.001G035200_A	17	12	30
Gorai.001G035300_D	4	4	15	SET domain protein 14	GO:0005515	AT3G61740.1	ATX3,SDG14
Gorai.001G036000_A	2	1	2	aberrant lateral root formation 4		AT5G11030.2	ALF4
Gorai.001G036400_A	5	1	8	Protein kinase superfamily protein	GO:0004672,GO:0005524,GO:0006468	AT2G25220.1
Gorai.001G036900_A	10	12	25	chromatin remodeling factor CHD3 (PICKLE)	GO:0003677,GO:0005524,GO:0003676,GO:0004386,GO:0005515,GO:0016787,GO:0008270,GO:0016818,GO:0006355,GO:0005634	AT2G25170.1	CHD3,CHR6,GYM,PKL,SSL2
Gorai.001G036900_D	7	12	17	chromatin remodeling factor CHD3 (PICKLE)	GO:0003677,GO:0005524,GO:0003676,GO:0004386,GO:0005515,GO:0016787,GO:0008270,GO:0016818,GO:0006355,GO:0005634	AT2G25170.1	CHD3,CHR6,GYM,PKL,SSL2
Gorai.001G037000_D	1	15	1	Polynucleotidyl transferase, ribonuclease H-like superfamily protein	GO:0005634	AT2G32070.1
Gorai.001G037200_D	10	1	14			AT4G31880.1
Gorai.001G037500_A	10	1	30	TBP-associated factor 5	GO:0005515,GO:0006355,GO:0005634,GO:0030528	AT5G25150.1	TAF5
Gorai.001G037900_D	7	8	1	nuclear RNA polymerase D2A	GO:0003677,GO:0003899,GO:0006351,GO:0032549	AT3G23780.1	DMS2,DRD2,NRPD2,NRPD2A,NRPE2
Gorai.001G038000_A	2	1	2	ATP-dependent caseinolytic (Clp) protease/crotonase family protein	GO:0003824,GO:0008152	AT4G31810.1
Gorai.001G038100_A	20	6	9
Gorai.001G038200_D	12	3	14	Phototropic-responsive NPH3 family protein	GO:0005515,GO:0004871,GO:0009416	AT4G31820.1	ENP,MAB4,NPY1
Gorai.001G038500_D	5	4	12
Gorai.001G038600_D	21	1	2	glutathione peroxidase 1	GO:0004602,GO:0006979,GO:0055114,GO:0016209,GO:0016491	AT2G25080.1	ATGPX1,GPX1
Gorai.001G038700_A	2	1	2	ubiquitin-specific protease 22	GO:0004221,GO:0006511,GO:0008270	AT5G10790.1	UBP22
Gorai.001G038700_D	2	1	6	ubiquitin-specific protease 22	GO:0004221,GO:0006511,GO:0008270	AT5G10790.1	UBP22
Gorai.001G038800_A	9	2	1	enhancer of rudimentary protein, putative	GO:0007049	AT5G10810.1	ATER,ER
Gorai.001G040500_A	2	1	2	Cellulose-synthase-like C5		AT4G31590.1	ATCSLC05,ATCSLC5,CSLC05,CSLC5
Gorai.001G040700_A	2	1	2	Zinc finger (CCCH-type) family protein	GO:0003676,GO:0008270	AT3G19360.1
Gorai.001G041100_D	7	7	24	RNA polymerase II transcription mediators	GO:0001104,GO:0006357,GO:0016592,GO:0016455	AT5G20170.1
Gorai.001G041300_A	10	1	14	Galactose oxidase/kelch repeat superfamily protein	GO:0005515	AT1G55270.1
Gorai.001G041400_A	2	1	11	Protein kinase superfamily protein	GO:0016773	AT2G26830.1	emb1187
Gorai.001G041700_A	1	2	4			AT1G67170.1
Gorai.001G043100_D	1	2	1	Glycosyl hydrolase superfamily protein	GO:0004553,GO:0005975	AT2G26600.1
Gorai.001G043700_D	1	6	1	zinc finger (ubiquitin-hydrolase) domain-containing protein	GO:0008270	AT2G42160.1	BRIZ1
Gorai.001G044300_A	2	1	11	Calcium-binding EF-hand family protein	GO:0005509,GO:0007165,GO:0005578	AT2G43290.1	MSS3
Gorai.001G044700_D	1	2	1	Cellulose synthase family protein	GO:0016760,GO:0030244,GO:0016020	AT5G17420.1	ATCESA7,CESA7,IRX3,MUR10
Gorai.001G045200_D	14	3	5	Protein of unknown function, DUF642		AT5G11420.1
Gorai.001G045600_D	7	11	1	Enhancer of polycomb-like transcription factor protein		AT4G32620.1
Gorai.001G046100_D	9	2	10	low psii accumulation2		AT5G51545.1	LPA2
Gorai.001G046900_D	1	2	1	1-amino-cyclopropane-1-carboxylate synthase 12	GO:0016740,GO:0030170,GO:0009058,GO:0016769	AT5G51690.1	ACS12
Gorai.001G047700_A	9	15	3	B12D protein		AT3G48140.1
Gorai.001G047700_D	9	15	12	B12D protein		AT3G48140.1
Gorai.001G047900_A	2	7	2	C3HC zinc finger-like	GO:0008270,GO:0005634	AT1G48950.1
Gorai.001G047900_D	2	1	6	C3HC zinc finger-like	GO:0008270,GO:0005634	AT1G48950.1
Gorai.001G048500_A	20	6	9	RPM1 interacting protein 2		AT4G25230.1	RIN2
Gorai.001G048600_A	1	2	4	phosphate starvation-induced gene 3	GO:0022857,GO:0055085,GO:0016021	AT3G47420.1	ATPS3,PS3
Gorai.001G050300_A	2	1	11	U-box domain-containing protein kinase family protein	GO:0004672,GO:0005524,GO:0006468,GO:0006950,GO:0004842,GO:0016567,GO:0000151	AT4G25160.1
Gorai.001G050400_A	12	6	1	HAD superfamily, subfamily IIIB acid phosphatase	GO:0003993	AT4G25150.1
Gorai.001G050400_D	1	2	1	HAD superfamily, subfamily IIIB acid phosphatase	GO:0003993	AT4G25150.1
Gorai.001G050800_A	2	1	2	ubiquinol-cytochrome C chaperone family protein		AT5G51220.1
Gorai.001G051100_D	14	3	5	Integrase-type DNA-binding superfamily protein	GO:0003700,GO:0006355	AT5G51190.1
Gorai.001G051200_A	1	30	22	Integrase-type DNA-binding superfamily protein	GO:0003700,GO:0006355	AT5G51190.1
Gorai.001G051500_D	4	4	7	VEFS-Box of polycomb protein		AT5G51230.1	AtEMF2,CYR1,EMF2,VEF2
Gorai.001G051600_D	2	1	2	S-adenosyl-L-methionine-dependent methyltransferases superfamily protein	GO:0016740,GO:0008168,GO:0031167,GO:0008276,GO:0006479,GO:0005737	AT1G54310.2
Gorai.001G051800_A	3	11	1			AT5G61670.1
Gorai.001G052300_A	6	2	20	Chlorophyll A-B binding family protein		AT4G17600.1	LIL3:1
Gorai.001G052600_A	2	1	2	Transcriptional coactivator/pterin dehydratase	GO:0008124,GO:0006729	AT5G51110.1
Gorai.001G052900_A	11	1	61	FRIGIDA-like protein		AT4G00650.1	FLA,FRI
Gorai.001G053000_D	1	2	1	Clp ATPase	GO:0005524,GO:0019538,GO:0016887	AT5G51070.1	CLPD,ERD1,SAG15
Gorai.001G053200_A	3	2	30
Gorai.001G053300_A	1	2	1	NADPH/respiratory burst oxidase protein D	GO:0005506,GO:0009055,GO:0016491,GO:0050660,GO:0016021,GO:0055114,GO:0004601,GO:0050664	AT5G51060.1	ATRBOHC,RBOHC,RHD2
Gorai.001G053800_A	2	1	2	Sec14p-like phosphatidylinositol transfer family protein		AT1G01630.1
Gorai.001G053800_D	2	1	11	Sec14p-like phosphatidylinositol transfer family protein		AT1G01630.1
Gorai.001G054100_D	13	1	61	transducin family protein / WD-40 repeat family protein	GO:0005515	AT5G50970.1
Gorai.001G054300_D	15	2	64	Histone superfamily protein		AT5G50930.1
Gorai.001G054500_D	2	1	2	signal recognition particle-related / SRP-related		AT5G61970.1
Gorai.001G054900_A	1	2	1	basic helix-loop-helix (bHLH) DNA-binding superfamily protein	GO:0030528,GO:0006355	AT5G50915.1
Gorai.001G055300_D	10	1	6	Protein kinase superfamily protein	GO:0004672,GO:0005524,GO:0006468	AT5G50860.1
Gorai.001G055500_D	1	2	1	homolog of Medicago truncatula MTN3	GO:0016021	AT5G23660.1	MTN3
Gorai.001G055700_D	1	2	4	Nodulin MtN3 family protein	GO:0016021	AT5G50790.1
Gorai.001G056200_A	2	1	23	DEK domain-containing chromatin associated protein		AT3G48710.1
Gorai.001G056300_D	2	1	2	Ribosomal protein L7Ae/L30e/S12e/Gadd45 family protein		AT3G62870.1
Gorai.001G056500_A	12	2	1	ACT domain repeat 4	GO:0016597,GO:0008152	AT1G69040.2	ACR4
Gorai.001G056700_A	13	4	2	Domain of unknown function (DUF1767)		AT5G63540.1	ATRMI1,BLAP75,RMI1
Gorai.001G057000_A	1	2	4	HVA22 homologue E		AT5G50720.1	ATHVA22E,HVA22E
Gorai.001G057400_A	1	2	1	pleiotropic drug resistance 12	GO:0005524,GO:0016887,GO:0016020	AT1G15520.1	ABCG40,ATABCG40,ATPDR12,PDR12
Gorai.001G057800_D	8	9	2	gamma carbonic anhydrase like 1		AT5G63510.1	GAMMA CAL1
Gorai.001G058200_A	2	1	9	non-specific phospholipase C6	GO:0016788	AT3G48610.1	NPC6
Gorai.001G058200_D	2	1	39	non-specific phospholipase C6	GO:0016788	AT3G48610.1	NPC6
Gorai.001G058400_A	1	14	1	DNAJ heat shock N-terminal domain-containing protein	GO:0031072	AT5G53150.1
Gorai.001G059200_A	5	47	2	SNF1-related protein kinase regulatory subunit gamma 1	GO:0005515	AT3G48530.1	KING1
Gorai.001G059300_D	14	3	5	Cysteine proteinases superfamily protein	GO:0008234,GO:0006508	AT3G48480.1
Gorai.001G059400_A	19	1	2	AAA-type ATPase family protein	GO:0005524,GO:0005515,GO:0009378,GO:0006281,GO:0006310	AT4G02480.1
Gorai.001G059600_D	2	1	71	RNA-metabolising metallo-beta-lactamase family protein	GO:0016787	AT5G63420.1	emb2746
Gorai.001G059700_D	13	1	30	cyclopropyl isomerase		AT5G50375.1	CPI1
Gorai.001G059900_A	2	1	2	arginosuccinate synthase family	GO:0004055,GO:0005524,GO:0006526	AT4G24830.1
Gorai.001G060300_D	2	1	2	adenylate kinase 1	GO:0005524,GO:0019205,GO:0006139,GO:0004017	AT5G63400.1	ADK1
Gorai.001G060500_D	9	2	3	Uncharacterised protein family (UPF0041)		AT5G20090.1
Gorai.001G061500_A	25	1	28	radical SAM domain-containing protein / GCN5-related N-acetyltransferase (GNAT) family protein		AT5G50320.1	AtELP3,ELO3,ELP3,HAC8,HAG3
Gorai.001G061900_A	2	1	2	relative of early flowering 6	GO:0005515	AT3G48430.1	REF6
Gorai.001G062100_A	10	1	7	Pentatricopeptide repeat (PPR) superfamily protein		AT5G50280.1	EMB1006
Gorai.001G062200_A	2	1	2	AAA-type ATPase family protein	GO:0005524,GO:0003887	AT4G24790.1
Gorai.001G062200_D	2	1	2	AAA-type ATPase family protein	GO:0005524,GO:0003887	AT4G24790.1
Gorai.001G064000_A	2	1	2	quinolinate synthase	GO:0008987,GO:0009435	AT5G50210.1	OLD5,QS,SUFE3
Gorai.001G064300_A	2	1	2	Ribosomal protein L19 family protein	GO:0003735,GO:0006412,GO:0005622,GO:0005840	AT4G11630.1
Gorai.001G064500_A	2	1	2	Leucine-rich repeat (LRR) family protein	GO:0005515	AT1G13230.1
Gorai.001G066000_A	5	1	2	serine/threonine protein kinase 3	GO:0004672,GO:0005524,GO:0006468	AT5G08160.1	ATPK3,PK3
Gorai.001G066000_D	2	1	2	serine/threonine protein kinase 3	GO:0004672,GO:0005524,GO:0006468	AT5G08160.1	ATPK3,PK3
Gorai.001G066100_A	2	1	21	LAG1 longevity assurance homolog 3	GO:0016021	AT1G13580.2	LAG13
Gorai.001G066100_D	2	1	2	LAG1 longevity assurance homolog 3	GO:0016021	AT1G13580.2	LAG13
Gorai.001G066400_D	1	2	1	RING/U-box protein	GO:0005515	AT3G05670.1
Gorai.001G066500_D	1	2	1	phosphoinositide 4-kinase gamma 7	GO:0016773	AT2G03890.1	ATPI4K GAMMA 7,PI4K GAMMA 7,UBDK GAMMA 7
Gorai.001G066600_D	1	11	1	O-fucosyltransferase family protein		AT5G15740.1
Gorai.001G066700_A	25	8	37
Gorai.001G067000_A	10	1	5	OBF binding protein 4	GO:0003677,GO:0008270,GO:0006355	AT5G60850.1	OBP4
Gorai.001G067000_D	7	7	1	OBF binding protein 4	GO:0003677,GO:0008270,GO:0006355	AT5G60850.1	OBP4
Gorai.001G067100_D	5	1	5	18S pre-ribosomal assembly protein gar2-related		AT2G03810.1
Gorai.001G067900_D	2	1	2	UDP-Glycosyltransferase superfamily protein	GO:0016758,GO:0005975,GO:0030259,GO:0030246	AT1G73740.1
Gorai.001G068200_A	12	19	3	Vacuolar protein sorting-associated protein 26	GO:0007034,GO:0030904	AT1G48550.1
Gorai.001G068300_D	2	1	2	white-brown complex homolog protein 11	GO:0005524,GO:0016887,GO:0016020	AT1G17840.1	ABCG11,ATWBC11,COF1,DSO,WBC11
Gorai.001G068900_A	12	6	2	annexin 5	GO:0005509,GO:0005544	AT1G68090.1	ANN5,ANNAT5
Gorai.001G069200_A	2	1	2	FKBP-type peptidyl-prolyl cis-trans isomerase family protein	GO:0006457	AT3G21640.1	ATFKBP42,FKBP42,TWD1,UCU2
Gorai.001G069200_D	5	1	2	FKBP-type peptidyl-prolyl cis-trans isomerase family protein	GO:0006457	AT3G21640.1	ATFKBP42,FKBP42,TWD1,UCU2
Gorai.001G069400_D	11	1	3			AT1G73470.1
Gorai.001G071200_D	11	10	2	aldehyde dehydrogenase 10A8	GO:0016491,GO:0008152,GO:0055114	AT1G74920.1	ALDH10A8
Gorai.001G071300_A	5	1	65	FKBP12 interacting protein 37		AT3G54170.1	ATFIP37,FIP37
Gorai.001G071400_A	2	1	2	Glucose-6-phosphate/phosphate translocator-related	GO:0016020,GO:0055085	AT5G33320.1	ARAPPT,CUE1,PPT
Gorai.001G072000_D	9	33	62	NAP1-related protein 2	GO:0006334,GO:0005634	AT1G18800.1	NRP2
Gorai.001G072400_D	10	7	7	IQ-domain 30	GO:0005515	AT1G18840.1	IQD30
Gorai.001G072500_D	9	2	10	FKBP-like peptidyl-prolyl cis-trans isomerase family protein	GO:0016853	AT1G26550.1
Gorai.001G072600_A	2	1	6	fucosyltransferase 1	GO:0008107,GO:0042546,GO:0016020	AT2G03220.1	ATFT1,ATFUT1,FT1,MUR2
Gorai.001G072600_D	2	1	2	fucosyltransferase 1	GO:0008107,GO:0042546,GO:0016020	AT2G03220.1	ATFT1,ATFUT1,FT1,MUR2
Gorai.001G072900_A	9	2	19	Protein of unknown function (DUF962)		AT1G18720.1
Gorai.001G072900_D	1	2	1	Protein of unknown function (DUF962)		AT1G18720.1
Gorai.001G073000_D	26	4	1
Gorai.001G073500_D	1	2	1	SPFH/Band 7/PHB domain-containing membrane-associated protein family	GO:0016020	AT5G62740.1	ATHIR1,HIR1
Gorai.001G074100_D	1	2	1	proline-rich family protein	GO:0006396	AT5G62640.1	ELF5
Gorai.001G074300_D	6	2	4	light-harvesting chlorophyll-protein complex I subunit A4	GO:0016020,GO:0009765	AT3G47470.1	CAB4,LHCA4
Gorai.001G074600_D	11	1	32	malate dehydrogenase	GO:0016491,GO:0055114,GO:0003854,GO:0016616,GO:0006694,GO:0030060,GO:0006108	AT3G47520.1	MDH
Gorai.001G074700_D	8	2	27	RNA-binding (RRM/RBD/RNP motifs) family protein with retrovirus zinc finger-like domain	GO:0003676,GO:0008270	AT3G26420.1	ATRZ-1A
Gorai.001G075100_D	2	1	2	Ribosomal protein S7e family protein	GO:0003735,GO:0006412,GO:0005622,GO:0005840	AT1G48830.1
Gorai.001G075200_D	20	4	9	ATP binding microtubule motor family protein	GO:0003777,GO:0005524,GO:0007018	AT1G18370.1	ATNACK1,HIK,NACK1
Gorai.001G075300_A	15	1	12	cytochrome P450, family 77, subfamily A, polypeptide 5 pseudogene	GO:0008152,GO:0003824	AT3G18270.1	CYP77A5P
Gorai.001G075800_A	6	3	15	AGAMOUS-like 8	GO:0003677,GO:0046983,GO:0003700,GO:0006355,GO:0005634,GO:0043565	AT5G60910.1	AGL8,FUL
Gorai.001G075800_D	14	3	8	AGAMOUS-like 8	GO:0003677,GO:0046983,GO:0003700,GO:0006355,GO:0005634,GO:0043565	AT5G60910.1	AGL8,FUL
Gorai.001G076300_A	1	3	1	reversibly glycosylated polypeptide 3	GO:0008466,GO:0016758,GO:0007047,GO:0030244,GO:0005618,GO:0030054	AT3G08900.1	RGP,RGP3
Gorai.001G076400_D	1	2	1	SPIRAL1-like1		AT1G26355.1	SP1L1
Gorai.001G076600_A	2	7	2			AT1G74160.1
Gorai.001G077100_D	1	2	31	Presenilin-2	GO:0004190,GO:0016021	AT2G29900.1	PS2
Gorai.001G077200_A	21	7	6			AT5G61040.1
Gorai.001G077300_A	5	1	45	3-phosphoserine phosphatase	GO:0003824,GO:0008152	AT1G18640.2	PSP
Gorai.001G077500_A	1	2	1	Protein of unknown function, transmembrane-40		AT3G05010.1
Gorai.001G078000_A	2	22	2	Leucine-rich repeat (LRR) family protein	GO:0005515	AT5G61240.1
Gorai.001G078400_D	5	1	2	alpha-N-acetylglucosaminidase family / NAGLU family		AT5G13690.1	CYL1,NAGLU
Gorai.001G078600_A	25	7	2	Ribosomal protein S5 family protein	GO:0003723,GO:0003735,GO:0006412,GO:0005622,GO:0005840	AT1G58983.1
Gorai.001G078800_D	8	9	3	eukaryotic elongation factor 5A-1	GO:0003723,GO:0003746,GO:0043022,GO:0006452,GO:0045901,GO:0045905,GO:0008612	AT1G13950.1	ATELF5A-1,EIF-5A,EIF5A,ELF5A-1
Gorai.001G078900_A	2	4	2	actin binding	GO:0005515	AT5G07740.1
Gorai.001G079000_D	1	2	1			AT5G61340.1
Gorai.001G079100_A	4	4	7	zinc finger (C3HC4-type RING finger) family protein	GO:0004176,GO:0006508	AT1G18660.1
Gorai.001G079100_D	2	1	7	zinc finger (C3HC4-type RING finger) family protein	GO:0004176,GO:0006508	AT1G18660.1
Gorai.001G079800_A	11	10	2	ARM repeat superfamily protein	GO:0008565,GO:0006886	AT5G62600.1
Gorai.001G079800_D	2	1	2	ARM repeat superfamily protein	GO:0008565,GO:0006886	AT5G62600.1
Gorai.001G080000_A	17	4	6	Zinc-finger domain of monoamine-oxidase A repressor R1 protein		AT5G38690.1
Gorai.001G080200_A	16	5	2	Cytochrome c oxidase biogenesis protein Cmc1-like		AT5G16060.1
Gorai.001G080800_D	12	6	19
Gorai.001G080900_D	5	1	2
Gorai.001G081200_A	6	2	19	sterol 1	GO:0005506,GO:0016491,GO:0006633,GO:0055114	AT3G02580.1	BUL1,DWF7,STE1
Gorai.001G081800_D	8	5	2	cytochrome B561-1	GO:0016021	AT5G38630.1	ACYB-1,CYB-1
Gorai.001G081900_A	2	1	2	receptor-like kinase 1	GO:0004672,GO:0005524,GO:0006468,GO:0005515	AT1G48480.1	RKL1
Gorai.001G082000_A	1	14	1			AT1G67170.1
Gorai.001G082300_A	13	12	2	NAD(P)-binding Rossmann-fold superfamily protein	GO:0003854,GO:0016616,GO:0006694,GO:0055114,GO:0003824,GO:0050662,GO:0044237	AT5G14700.1
Gorai.001G082300_D	13	3	2	NAD(P)-binding Rossmann-fold superfamily protein	GO:0003854,GO:0016616,GO:0006694,GO:0055114,GO:0003824,GO:0050662,GO:0044237	AT5G14700.1
Gorai.001G082400_D	1	2	1		GO:0016021	AT3G02420.1
Gorai.001G082800_A	2	1	63	Tetratricopeptide repeat (TPR)-like superfamily protein	GO:0005515	AT5G37590.1
Gorai.001G083100_A	1	2	1	Endomembrane protein 70 protein family	GO:0016021	AT5G37310.1
Gorai.001G083100_D	1	2	1	Endomembrane protein 70 protein family	GO:0016021	AT5G37310.1
Gorai.001G083300_A	2	1	5	expansin A13		AT3G03220.1	ATEXP13,ATEXPA13,ATHEXP ALPHA 1.22,EXP13,EXPA13
Gorai.001G083300_D	2	1	2	expansin A13		AT3G03220.1	ATEXP13,ATEXPA13,ATHEXP ALPHA 1.22,EXP13,EXPA13
Gorai.001G083600_A	34	6	2	glutathione S-transferase phi 12	GO:0005515	AT5G17220.1	ATGSTF12,GST26,GSTF12,TT19
Gorai.001G083600_D	34	6	2	glutathione S-transferase phi 12	GO:0005515	AT5G17220.1	ATGSTF12,GST26,GSTF12,TT19
Gorai.001G083800_D	1	2	1	Class I glutamine amidotransferase-like superfamily protein		AT3G02720.1
Gorai.001G084000_D	3	12	1	lipid phosphate phosphatase 3	GO:0003824,GO:0016020	AT3G02600.1	ATLPP3,LPP3
Gorai.001G084300_D	2	17	2	MATE efflux family protein	GO:0015238,GO:0015297,GO:0006855,GO:0055085,GO:0016020	AT2G04050.1
Gorai.001G085000_A	1	2	56	Bifunctional inhibitor/lipid-transfer protein/seed storage 2S albumin superfamily protein		AT4G33355.1
Gorai.001G085900_D	2	1	7	formyltransferase, putative	GO:0016742,GO:0009058	AT1G66520.1	pde194
Gorai.001G086400_D	6	2	19			AT3G51500.1
Gorai.001G086700_A	7	8	1	ARM repeat superfamily protein	GO:0005515	AT3G03440.1
Gorai.001G087600_A	5	1	2
Gorai.001G088900_A	1	3	1	cytochrome P450, family 81, subfamily D, polypeptide 8	GO:0005506,GO:0009055,GO:0016705,GO:0020037,GO:0055114	AT4G37370.1	CYP81D8
Gorai.001G089200_D	2	4	52	Protein of unknown function DUF2359, transmembrane		AT1G23170.2
Gorai.001G089400_D	7	11	1	GRAS family transcription factor family protein		AT2G01570.1	RGA,RGA1
Gorai.001G089500_D	4	4	14	5\'-AMP-activated protein kinase-related		AT5G39790.1
Gorai.001G090200_A	22	6	1	reversibly glycosylated polypeptide 1	GO:0008466,GO:0016758,GO:0007047,GO:0030244,GO:0005618,GO:0030054	AT3G02230.1	ATRGP1,RGP1
Gorai.001G092000_A	22	6	1	phytoene desaturation 1	GO:0009072,GO:0003868	AT1G06570.1	HPD,PDS1
Gorai.001G092000_D	1	2	10	phytoene desaturation 1	GO:0009072,GO:0003868	AT1G06570.1	HPD,PDS1
Gorai.001G092600_A	2	1	14	S-adenosyl-L-methionine-dependent methyltransferases superfamily protein		AT2G32170.1
Gorai.001G092600_D	5	1	6	S-adenosyl-L-methionine-dependent methyltransferases superfamily protein		AT2G32170.1
Gorai.001G092800_A	22	2	3			AT2G32190.1
Gorai.001G092800_D	1	2	1			AT2G32190.1
Gorai.001G092900_A	2	5	2	Ribosomal L27e protein family	GO:0003735,GO:0006412,GO:0005622,GO:0005840	AT4G15000.1
Gorai.001G092900_D	16	5	2	Ribosomal L27e protein family	GO:0003735,GO:0006412,GO:0005622,GO:0005840	AT4G15000.1
Gorai.001G093000_A	1	2	1	hAT transposon superfamily	GO:0003677,GO:0046983	AT4G15020.1
Gorai.001G093300_A	2	1	32	DHHC-type zinc finger family protein	GO:0008270	AT4G15080.1
Gorai.001G093700_A	15	4	12	Transcription factor TFIIE, alpha subunit		AT1G03280.1
Gorai.001G093800_D	2	5	2	breast basic conserved 1	GO:0003735,GO:0006412,GO:0005622,GO:0005840	AT3G49010.1	ATBBC1,BBC1,RSU2
Gorai.001G095000_A	2	1	2	embryo defective 1381		AT2G31340.1	emb1381
Gorai.001G095000_D	4	1	2	embryo defective 1381		AT2G31340.1	emb1381
Gorai.001G095200_D	9	15	19	small ubiquitin-like modifier 2	GO:0005515	AT5G55160.1	ATSUMO2,SUM2,SUMO 2,SUMO2
Gorai.001G096000_A	2	1	2	chitin elicitor receptor kinase 1	GO:0004672,GO:0005524,GO:0006468	AT3G21630.1	CERK1,LYSM RLK1
Gorai.001G096000_D	5	5	2	chitin elicitor receptor kinase 1	GO:0004672,GO:0005524,GO:0006468	AT3G21630.1	CERK1,LYSM RLK1
Gorai.001G096200_D	20	2	16	ethylene-forming enzyme		AT1G05010.1	ACO4,EAT1,EFE
Gorai.001G096300_D	1	6	17	ethylene-forming enzyme	GO:0016491,GO:0016706,GO:0055114	AT1G05010.1	ACO4,EAT1,EFE
Gorai.001G096900_D	26	7	10	Zinc finger C-x8-C-x5-C-x3-H type family protein	GO:0003676,GO:0008270	AT1G04990.1
Gorai.001G097300_D	21	1	5	Metallo-hydrolase/oxidoreductase superfamily protein		AT2G04530.1	CPZ,TRZ2
Gorai.001G097400_A	2	7	6	TATA BOX ASSOCIATED FACTOR II 59	GO:0006352,GO:0005634,GO:0051090,GO:0016986,GO:0003702	AT1G04950.1	ATTAF6,TAF6,TAFII59
Gorai.001G097500_A	2	1	2
Gorai.001G097900_A	9	2	3	FASCICLIN-like arabinoogalactan 7		AT2G04780.1	FLA7
Gorai.001G097900_D	9	2	12	FASCICLIN-like arabinoogalactan 7		AT2G04780.1	FLA7
Gorai.001G098400_A	11	7	60	Kinase-related protein of unknown function (DUF1296)		AT3G07660.1
Gorai.001G098900_A	14	3	5	F-box family protein	GO:0005515	AT5G48170.1	SLY2
Gorai.001G099000_A	1	7	1	DNAJ heat shock N-terminal domain-containing protein	GO:0031072	AT2G05250.1
Gorai.001G099300_D	9	2	1	Peptidase M28 family protein	GO:0008233,GO:0006508	AT3G54720.1	AMP1,COP2,HPT,MFO1,PT
Gorai.001G100000_A	3	8	1	Homeodomain-like protein with RING/FYVE/PHD-type zinc finger domain		AT1G01150.1
Gorai.001G100500_A	9	15	47			AT3G07568.1
Gorai.001G100900_D	12	24	8	formin homology 1		AT3G25500.1	AFH1,AHF1,ATFH1,FH1
Gorai.001G101100_D	1	2	1	FRIGIDA-like protein		AT5G48385.1
Gorai.001G102000_D	1	2	1			AT3G07510.1
Gorai.001G102300_D	1	2	10	YGGT family protein	GO:0016020	AT4G27990.1	ATYLMG1-2,YLMG1-2
Gorai.001G103300_D	10	1	104	basic helix-loop-helix (bHLH) DNA-binding superfamily protein	GO:0030528,GO:0006355	AT3G07340.1
Gorai.001G103400_D	2	7	6	rotamase FKBP 1	GO:0006457,GO:0005515	AT3G25230.1	ATFKBP62,FKBP62,ROF1
Gorai.001G104800_A	2	0	2	Nucleotide-diphospho-sugar transferases superfamily protein	GO:0016757	AT3G25140.1	GAUT8,QUA1
Gorai.001G105600_A	1	6	1
Gorai.001G106600_D	1	2	16	CCT motif family protein	GO:0005515	AT5G59990.1
Gorai.001G106800_D	21	7	6	ER-type Ca2+-ATPase 1	GO:0000166,GO:0046872,GO:0003824,GO:0008152,GO:0016020,GO:0015662,GO:0006812,GO:0006754	AT1G07810.1	ACA3,ATECA1,ECA1
Gorai.001G107600_A	2	5	2	ribosomal protein L23AB	GO:0003735,GO:0006412,GO:0005840,GO:0005622	AT3G55280.1	RPL23AB
Gorai.001G107700_D	13	6	7	RING/U-box superfamily protein		AT1G72220.1
Gorai.001G107800_A	1	2	82	Protein of unknown function (DUF1635)		AT2G28690.1
Gorai.001G108700_D	9	2	19	dessication-induced 1VOC superfamily protein		AT1G07645.1	ATDSI-1VOC,DSI-1VOC
Gorai.001G108800_A	9	15	19	ubiquitin-conjugating enzyme 13	GO:0016881	AT3G46460.1	UBC13
Gorai.001G108800_D	9	15	19	ubiquitin-conjugating enzyme 13	GO:0016881	AT3G46460.1	UBC13
Gorai.001G109300_A	6	3	1	Dof-type zinc finger DNA-binding family protein	GO:0003677,GO:0008270,GO:0006355	AT2G28810.1
Gorai.001G109500_D	11	1	28	plant U-box 13	GO:0005515,GO:0004842,GO:0016567,GO:0000151	AT3G46510.1	ATPUB13,PUB13
Gorai.001G109900_D	16	5	6	SEC12P-like 2 protein	GO:0005515	AT2G01470.1	ATSEC12,STL2P
Gorai.001G110100_A	9	2	29	XB3 ortholog 1 in Arabidopsis thaliana	GO:0005515	AT2G28840.1	XBAT31
Gorai.001G110100_D	15	8	12	XB3 ortholog 1 in Arabidopsis thaliana	GO:0005515	AT2G28840.1	XBAT31
Gorai.001G110700_D	2	1	2	outer plastid envelope protein 16-1	GO:0015031,GO:0008565,GO:0005743	AT2G28900.1	ATOEP16-1,ATOEP16-L,OEP16,OEP16-1
Gorai.001G111200_D	2	1	5	Exostosin family protein	GO:0016020	AT2G29040.1
Gorai.001G111300_D	2	1	27			AT5G59400.1
Gorai.001G112300_A	10	1	7	translocon at the outer envelope membrane of chloroplasts 75-III	GO:0019867	AT3G46740.1	MAR1,TOC75-III
Gorai.001G112300_D	7	7	30	translocon at the outer envelope membrane of chloroplasts 75-III	GO:0019867	AT3G46740.1	MAR1,TOC75-III
Gorai.001G112800_A	1	9	1	type one serine/threonine protein phosphatase 2	GO:0016787	AT5G59160.1	PPO,TOPP2
Gorai.001G113300_D	12	3	39	UDP-glucosyl transferase 76E2	GO:0016758,GO:0008152	AT5G59590.1	UGT76E2
Gorai.001G113900_D	12	2	13	UDP-Glycosyltransferase superfamily protein	GO:0016758,GO:0008152	AT3G11340.1
Gorai.001G114000_D	34	2	2	UDP-glucosyl transferase 76E2	GO:0016758,GO:0008152	AT5G59590.1	UGT76E2
Gorai.001G115200_A	2	1	2	zinc finger (C2H2 type) family protein		AT2G29660.1
Gorai.001G115200_D	17	3	11	zinc finger (C2H2 type) family protein		AT2G29660.1
Gorai.001G115500_A	9	2	4	anthranilate synthase 2	GO:0016833,GO:0009058	AT2G29690.1	ASA2,ATHANSYNAB
Gorai.001G115700_A	15	3	18	pleiotropic drug resistance 3	GO:0005524,GO:0016887,GO:0016020	AT2G29940.1	ATPDR3,PDR3
Gorai.001G115700_D	15	22	10	pleiotropic drug resistance 3	GO:0005524,GO:0016887,GO:0016020	AT2G29940.1	ATPDR3,PDR3
Gorai.001G116000_A	5	4	47	pleiotropic drug resistance 3	GO:0005524,GO:0016887,GO:0016020	AT2G29940.1	ATPDR3,PDR3
Gorai.001G116500_A	1	2	1	fatty acid desaturase 8	GO:0006629,GO:0016717,GO:0055114,GO:0016491	AT5G05580.1	FAD8
Gorai.001G116600_D	1	6	1	alternative NAD(P)H dehydrogenase 2	GO:0016491,GO:0050660,GO:0055114	AT2G29990.1	NDA2
Gorai.001G117000_A	1	2	4	glutamine-dependent asparagine synthase 1	GO:0004066,GO:0006529	AT3G47340.1	ASN1,AT-ASN1,DIN6
Gorai.001G117300_A	1	2	1	DNA-binding storekeeper protein-related transcriptional regulator		AT1G61730.1
Gorai.001G117500_D	4	4	39	Acyl-CoA N-acyltransferase with RING/FYVE/PHD-type zinc finger domain	GO:0005515	AT2G27980.1
Gorai.001G118100_A	16	6	12	geranyl diphosphate synthase 1	GO:0008299	AT2G34630.2	GPPS,GPS1
Gorai.001G118400_A	4	4	7		GO:0033615,GO:0005743	AT1G08220.1
Gorai.001G119100_D	6	2	20	AT hook motif DNA-binding family protein		AT2G45850.1
Gorai.001G121100_A	2	1	2	proteinaceous RNase P 2	GO:0055085,GO:0016020,GO:0015297,GO:0015238,GO:0006855	AT2G16650.1	PRORP2
Gorai.001G121100_D	2	1	2	proteinaceous RNase P 2	GO:0055085,GO:0016020,GO:0015297,GO:0015238,GO:0006855	AT2G16650.1	PRORP2
Gorai.001G121200_A	2	1	2	Jojoba acyl CoA reductase-related male sterility protein	GO:0003854,GO:0016616,GO:0006694,GO:0055114,GO:0003824,GO:0050662,GO:0044237,GO:0016620	AT4G33790.1	CER4,FAR3,G7
Gorai.001G121200_D	2	1	2	Jojoba acyl CoA reductase-related male sterility protein	GO:0003854,GO:0016616,GO:0006694,GO:0055114,GO:0003824,GO:0050662,GO:0044237,GO:0016620	AT4G33790.1	CER4,FAR3,G7
Gorai.001G121300_A	2	1	2	Tetratricopeptide repeat (TPR)-like superfamily protein		AT2G27610.1
Gorai.001G121400_A	1	2	10	AAA-type ATPase family protein	GO:0005524,GO:0009378,GO:0006281,GO:0006310,GO:0016887	AT2G27600.1	ATSKD1,SKD1,VPS4
Gorai.001G121500_A	1	2	1	A20/AN1-like zinc finger family protein	GO:0008270,GO:0003677	AT2G27580.1
Gorai.001G122100_A	6	2	18	bZIP transcription factor family protein	GO:0003700,GO:0043565,GO:0046983,GO:0006355	AT1G08320.1	bZIP21,TGA9
Gorai.001G122100_D	1	2	1	bZIP transcription factor family protein	GO:0003700,GO:0043565,GO:0046983,GO:0006355	AT1G08320.1	bZIP21,TGA9
Gorai.001G122200_A	2	1	2	F-box/RNI-like superfamily protein		AT1G67190.1
Gorai.001G122500_D	1	2	1	Rho GTPase activating protein with PAK-box/P21-Rho-binding domain	GO:0007165,GO:0005622,GO:0005515	AT5G22400.1
Gorai.001G122700_A	1	2	1	Late embryogenesis abundant (LEA) hydroxyproline-rich glycoprotein family		AT3G44380.1
Gorai.001G122900_A	8	9	27	Protein of unknown function (DUF1022)		AT5G22350.1	ELM1
Gorai.001G123000_A	7	20	1	OTU-like cysteine protease family protein		AT2G27350.3
Gorai.001G123000_D	1	2	44	OTU-like cysteine protease family protein		AT2G27350.3
Gorai.001G123100_A	1	2	1	F-box family protein		AT2G27310.1
Gorai.001G123400_D	1	2	1	nitrilase 4	GO:0016810,GO:0006807	AT5G22300.1	AtNIT4,NIT4
Gorai.001G123600_A	5	1	2	Polynucleotidyl transferase, ribonuclease H-like superfamily protein	GO:0005634	AT3G44260.1
Gorai.001G123600_D	1	2	1	Polynucleotidyl transferase, ribonuclease H-like superfamily protein	GO:0005634	AT3G44260.1
Gorai.001G123900_A	1	2	1	E2F transcription factor 1	GO:0003700,GO:0006355,GO:0005667	AT5G22220.2	ATE2FB,E2F1,E2FB
Gorai.001G124100_A	5	1	2	Coiled-coil domain-containing protein 55 (DUF2040)		AT2G27285.1
Gorai.001G124500_D	12	5	4	Late embryogenesis abundant (LEA) hydroxyproline-rich glycoprotein family		AT2G27260.1
Gorai.001G124600_A	2	1	2			AT1G31660.1
Gorai.001G126400_D	2	1	7	MD-2-related lipid recognition domain-containing protein / ML domain-containing protein		AT3G11780.1
Gorai.001G128100_A	9	2	3	calmodulin 5	GO:0005509,GO:0007165,GO:0005578	AT2G27030.3	ACAM-2,CAM5
Gorai.001G128800_D	25	32	1	Bifunctional inhibitor/lipid-transfer protein/seed storage 2S albumin superfamily protein		AT3G43720.1
Gorai.001G130100_D	14	36	6	alpha/beta-Hydrolases superfamily protein		AT3G09690.1
Gorai.001G130500_A	1	6	4	Preprotein translocase Sec, Sec61-beta subunit protein		AT5G60460.1
Gorai.001G130800_D	6	2	1	Seven transmembrane MLO family protein	GO:0008219,GO:0016021	AT1G61560.1	ATMLO6,MLO6
Gorai.001G131200_A	1	2	1	FASCICLIN-like arabinogalactan-protein 11		AT5G03170.1	ATFLA11,FLA11
Gorai.001G131200_D	1	2	1	FASCICLIN-like arabinogalactan-protein 11		AT5G03170.1	ATFLA11,FLA11
Gorai.001G131900_A	5	1	69	Leucine-rich repeat transmembrane protein kinase	GO:0004672,GO:0005524,GO:0006468,GO:0005515	AT1G56130.1
Gorai.001G132100_A	5	1	2	vacuolar protein sorting 26B	GO:0007034,GO:0030904	AT4G27690.1	VPS26B
Gorai.001G132100_D	2	1	2	vacuolar protein sorting 26B	GO:0007034,GO:0030904	AT4G27690.1	VPS26B
Gorai.001G132200_A	2	1	2	CBL-interacting protein kinase 3	GO:0004672,GO:0005524,GO:0006468,GO:0007165	AT2G26980.4	CIPK3,SnRK3.17
Gorai.001G132200_D	2	1	11	CBL-interacting protein kinase 3	GO:0004672,GO:0005524,GO:0006468,GO:0007165	AT2G26980.4	CIPK3,SnRK3.17
Gorai.001G132900_D	1	9	1	Galactose oxidase/kelch repeat superfamily protein	GO:0005515	AT5G26960.1
Gorai.001G133000_A	1	2	1	4-(cytidine 5\'-phospho)-2-C-methyl-D-erithritol kinase	GO:0005524,GO:0016310,GO:0016301,GO:0050515,GO:0016114	AT2G26930.1	ATCDPMEK,CDPMEK,ISPE,PDE277
Gorai.001G133000_D	1	2	16	4-(cytidine 5\'-phospho)-2-C-methyl-D-erithritol kinase	GO:0005524,GO:0016310,GO:0016301,GO:0050515,GO:0016114	AT2G26930.1	ATCDPMEK,CDPMEK,ISPE,PDE277
Gorai.001G133500_D	8	9	27	general control non-repressible 4	GO:0005524,GO:0016887	AT3G54540.1	ATGCN4,GCN4
Gorai.001G133800_D	1	2	9	non-specific phospholipase C2	GO:0016788	AT2G26870.1	NPC2
Gorai.001G134800_A	20	20	9	Homeodomain-like superfamily protein	GO:0003700,GO:0043565,GO:0006355	AT4G03250.1
Gorai.001G134900_A	13	3	2	Cytochrome P450 superfamily protein	GO:0005506,GO:0009055,GO:0016705,GO:0020037,GO:0055114	AT5G07990.1	CYP75B1,D501,TT7
Gorai.001G134900_D	13	3	2	Cytochrome P450 superfamily protein	GO:0005506,GO:0009055,GO:0016705,GO:0020037,GO:0055114	AT5G07990.1	CYP75B1,D501,TT7
Gorai.001G135100_D	2	1	2	rhodanese-like domain-containing protein / PPIC-type PPIASE domain-containing protein	GO:0016853	AT5G19370.1
Gorai.001G135500_D	2	1	2	Pentatricopeptide repeat (PPR) superfamily protein		AT4G14190.1
Gorai.001G135600_A	13	16	2	Aldolase superfamily protein	GO:0003824	AT2G26800.1
Gorai.001G135700_A	2	1	2	Protein of unknown function (DUF803)	GO:0016020	AT1G34470.1
Gorai.001G135700_D	2	1	2	Protein of unknown function (DUF803)	GO:0016020	AT1G34470.1
Gorai.001G135900_A	20	4	9	NAD(P)-binding Rossmann-fold superfamily protein	GO:0016491,GO:0008152	AT4G27760.1	FEY,FEY3
Gorai.001G136100_A	23	2	23	Bifunctional inhibitor/lipid-transfer protein/seed storage 2S albumin superfamily protein		AT4G33550.2
Gorai.001G136300_A	7	3	1	DNA binding;zinc ion binding;DNA binding	GO:0005515	AT5G12400.1
Gorai.001G136400_A	7	8	1	DNA binding;zinc ion binding;DNA binding	GO:0005515	AT5G12400.1
Gorai.001G136400_D	7	3	1	DNA binding;zinc ion binding;DNA binding	GO:0005515	AT5G12400.1
Gorai.001G137300_A	1	2	3
Gorai.001G137800_D	7	7	24	NAD(P)-binding Rossmann-fold superfamily protein	GO:0016491,GO:0008152,GO:0003854,GO:0016616,GO:0006694,GO:0055114,GO:0003824,GO:0050662,GO:0044237	AT1G51410.1
Gorai.001G138000_A	2	1	2	calcium-dependent protein kinase 19	GO:0004672,GO:0005524,GO:0006468	AT5G19450.1	CDPK19,CPK8
Gorai.001G139100_A	11	7	2	RNA-binding (RRM/RBD/RNP motifs) family protein	GO:0003676	AT5G19350.1
Gorai.001G139300_A	28	1	13	Tetratricopeptide repeat (TPR)-like superfamily protein		AT1G08070.1	OTP82
Gorai.001G139300_D	1	2	1	Tetratricopeptide repeat (TPR)-like superfamily protein		AT1G08070.1	OTP82
Gorai.001G141000_A	1	6	19	root hair specific 13		AT4G02270.1	RHS13
Gorai.001G141500_D	1	2	44	NAD+ transporter 1		AT2G47490.1	ATNDT1,NDT1
Gorai.001G142800_D	2	1	7	Haloacid dehalogenase-like hydrolase (HAD) superfamily protein	GO:0003824,GO:0008152	AT2G32150.1
Gorai.001G143300_A	1	2	10	Heat shock protein DnaJ with tetratricopeptide repeat		AT4G02100.1
Gorai.001G143300_D	2	12	6	Heat shock protein DnaJ with tetratricopeptide repeat		AT4G02100.1
Gorai.001G143600_D	1	2	1	beta-xylosidase 2	GO:0004553,GO:0005975	AT1G02640.1	ATBXL2,BXL2
Gorai.001G144100_D	7	7	1	WD40/YVTN repeat-like-containing domain;Bromodomain	GO:0005515	AT2G47410.1
Gorai.001G144200_A	22	6	1	basic region/leucine zipper motif 53	GO:0003700,GO:0043565,GO:0046983,GO:0006355	AT3G62420.1	ATBZIP53,BZIP53
Gorai.001G144200_D	1	2	1	basic region/leucine zipper motif 53	GO:0003700,GO:0043565,GO:0046983,GO:0006355	AT3G62420.1	ATBZIP53,BZIP53
Gorai.001G144400_A	15	5	12	Cytochrome c oxidase subunit Vc family protein	GO:0055114,GO:0005746,GO:0004129	AT5G61310.1
Gorai.001G144500_D	8	6	64	nuclear encoded CLP protease 5	GO:0004252,GO:0006508	AT1G02560.1	CLPP5,NCLPP1,NCLPP5
Gorai.001G144700_D	15	1	12	Protein kinase superfamily protein	GO:0004672,GO:0005524,GO:0006468	AT4G02010.1
Gorai.001G144800_A	13	5	2	heme binding	GO:0020037,GO:0055114	AT3G62370.1
Gorai.001G144800_D	1	6	1	heme binding	GO:0020037,GO:0055114	AT3G62370.1
Gorai.001G145600_A	9	2	12			AT4G01935.1
Gorai.001G146000_D	6	2	5	pumilio 8	GO:0003723	AT1G22240.1	APUM8,PUM8
Gorai.001G146200_A	1	2	1	Protein phosphatase 2C family protein	GO:0003824	AT3G62260.1
Gorai.001G146300_D	14	12	5	Polyketide cyclase/dehydrase and lipid transport superfamily protein		AT1G02475.1
Gorai.001G146500_D	13	5	78	ubiquitin 6	GO:0005515,GO:0003735,GO:0006412,GO:0005622,GO:0005840	AT2G47110.1	UBQ6
Gorai.001G146600_D	15	1	2	methyltransferases	GO:0008168,GO:0008033	AT4G01880.1
Gorai.001G146800_A	20	6	9	S-adenosylmethionine synthetase 2	GO:0004478,GO:0006556,GO:0005524	AT4G01850.1	AtSAM2,MAT2,SAM-2,SAM2
Gorai.001G147600_A	5	1	2
Gorai.001G148500_D	1	2	1	myb domain protein 61	GO:0003677	AT1G09540.1	ATMYB61,MYB61
Gorai.001G149100_A	3	3	1	receptor-like protein kinase 2	GO:0004672,GO:0005524,GO:0006468,GO:0005515	AT3G02130.1	RPK2,TOAD2
Gorai.001G149900_A	24	2	9	Calcium-binding endonuclease/exonuclease/phosphatase family		AT1G02270.1
Gorai.001G150000_A	7	8	1	NAC transcription factor-like 9	GO:0003677,GO:0006355	AT4G35580.1	NTL9
Gorai.001G150500_D	21	12	5	pyrophosphorylase 1	GO:0000287,GO:0004427,GO:0006796,GO:0005737	AT1G01050.1	AtPPa1,PPa1
Gorai.001G150800_D	1	2	4	NAC (No Apical Meristem) domain transcriptional regulator superfamily protein	GO:0003677,GO:0006355	AT2G46770.1	ANAC043,EMB2301,NST1
Gorai.001G150900_A	1	2	4	3-ketoacyl-CoA synthase 1	GO:0016746,GO:0009058,GO:0016747,GO:0006633,GO:0016020,GO:0008610	AT1G01120.1	KCS1
Gorai.001G150900_D	37	6	4	3-ketoacyl-CoA synthase 1	GO:0016746,GO:0009058,GO:0016747,GO:0006633,GO:0016020,GO:0008610	AT1G01120.1	KCS1
Gorai.001G151400_D	1	2	1	S-adenosyl-L-methionine-dependent methyltransferases superfamily protein	GO:0008168,GO:0008610	AT1G01180.1
Gorai.001G152500_A	1	2	3	P-loop containing nucleoside triphosphate hydrolases superfamily protein	GO:0005524	AT2G46620.1
Gorai.001G152600_D	1	2	10	RAB GTPase homolog A3	GO:0003924,GO:0005525,GO:0007264,GO:0005622	AT1G01200.1	ATRAB-A3,ATRABA3,RABA3
Gorai.001G152900_A	3	2	15	ER-type Ca2+-ATPase 2	GO:0000166,GO:0046872,GO:0003824,GO:0008152,GO:0016020,GO:0015662,GO:0006812,GO:0006754	AT4G00900.1	ATECA2,ECA2
Gorai.001G153200_A	9	2	10	ORMDL family protein	GO:0016021	AT1G01230.1
Gorai.001G153200_D	1	2	3	ORMDL family protein	GO:0016021	AT1G01230.1
Gorai.001G153600_A	20	6	9	Tetratricopeptide repeat (TPR)-like superfamily protein	GO:0005515	AT4G10840.1
Gorai.001G153600_D	2	1	96	Tetratricopeptide repeat (TPR)-like superfamily protein	GO:0005515	AT4G10840.1
Gorai.001G154400_A	3	23	14	Eukaryotic aspartyl protease family protein	GO:0004190,GO:0006508	AT1G01300.1
Gorai.001G154500_A	8	2	27	phosphoinositide 4-kinase gamma 4	GO:0005515,GO:0016773	AT2G46500.1	ATPI4K GAMMA 4,PI4K GAMMA 4,UBDK GAMMA 4
Gorai.001G154800_A	5	1	2	DYNAMIN-like 1B	GO:0003924,GO:0005525	AT3G61760.1	ADL1B,DL1B
Gorai.001G155000_D	13	3	11	O-acyltransferase (WSD1-like) family protein	GO:0004144	AT5G53390.1
Gorai.001G156900_D	6	3	18	cytokinin response factor 6	GO:0003700,GO:0006355	AT3G61630.1	CRF6
Gorai.001G157300_D	1	2	1	Heavy metal transport/detoxification superfamily protein	GO:0046872,GO:0030001	AT1G01490.1
Gorai.001G157400_A	1	2	16	Late embryogenesis abundant protein		AT1G01470.1	LEA14,LSR3
Gorai.001G157400_D	1	2	16	Late embryogenesis abundant protein		AT1G01470.1	LEA14,LSR3
Gorai.001G157900_D	2	1	2	Reticulon family protein	GO:0005783	AT2G46170.1
Gorai.001G158000_A	15	1	12			AT2G46200.1
Gorai.001G158100_D	13	1	57	Fatty acid/sphingolipid desaturase	GO:0020037,GO:0006629,GO:0055114,GO:0016491	AT2G46210.1
Gorai.001G159100_A	25	1	107	Ribosomal protein S24/S35, mitochondrial		AT3G18240.1
Gorai.001G159800_A	15	2	12	RING-H2 finger B1A		AT4G00335.1	RHB1A
Gorai.001G161600_A	28	2	3
Gorai.001G162000_A	27	13	35	Di-haem cytochrome, transmembrane;Cytochrome b/b6, C-terminal	GO:0009055,GO:0016491,GO:0016020,GO:0022904	AT2G07727.1
Gorai.001G162300_A	27	13	35	cytochrome C biogenesis 452		ATMG00180.1
Gorai.001G162300_D	27	6	47	cytochrome C biogenesis 452		ATMG00180.1
Gorai.001G162400_A	27	13	35	Cytochrome c oxidase, subunit III	GO:0015002,GO:0016020,GO:0006123,GO:0004129	AT2G07687.1
Gorai.001G162500_A	27	13	35	cytochrome oxidase	GO:0004129,GO:0005506,GO:0009055,GO:0020037,GO:0009060,GO:0055114,GO:0016021	ATMG01360.1
Gorai.001G162600_A	27	13	35
Gorai.001G163000_D	27	13	35
Gorai.001G163400_A	27	13	35	NADH dehydrogenase 5B	GO:0015078,GO:0015991,GO:0033177,GO:0008137,GO:0042773,GO:0055114	ATMG00665.1
Gorai.001G163400_D	27	13	35	NADH dehydrogenase 5B	GO:0015078,GO:0015991,GO:0033177,GO:0008137,GO:0042773,GO:0055114	ATMG00665.1
Gorai.001G163900_A	27	2	35
Gorai.001G163900_D	27	13	35
Gorai.001G164400_A	27	6	19
Gorai.001G164500_A	27	13	35	Plant mitochondrial ATPase, F0 complex, subunit 8 protein	GO:0015078,GO:0015986,GO:0000276,GO:0016820,GO:0005739,GO:0016021	AT2G07707.1
Gorai.001G164600_A	27	2	21	NADH-Ubiquinone/plastoquinone (complex I) protein	GO:0008137,GO:0042773,GO:0055114	AT2G07689.1
Gorai.001G164900_D	8	6	3
Gorai.001G165200_A	27	17	3
Gorai.001G166300_D	27	13	35	NADH dehydrogenase subunit 4	GO:0008137,GO:0042773,GO:0055114	ATMG00580.1
Gorai.001G166600_A	27	13	35
Gorai.001G166600_D	27	13	35
Gorai.001G167700_A	27	13	21	NADH dehydrogenase 2B		ATMG01320.1
Gorai.001G167800_A	27	13	3	NADH dehydrogenase 5B	GO:0008137,GO:0042773,GO:0055114	ATMG00665.1
Gorai.001G167900_A	22	6	4
Gorai.001G168700_A	7	12	1	transcription regulatory protein SNF2, putative	GO:0003677,GO:0005524,GO:0003676,GO:0004386,GO:0005515,GO:0016818,GO:0006355,GO:0005634	AT2G46020.2	ATBRM,BRM,CHA2,CHR2
Gorai.001G168700_D	7	4	1	transcription regulatory protein SNF2, putative	GO:0003677,GO:0005524,GO:0003676,GO:0004386,GO:0005515,GO:0016818,GO:0006355,GO:0005634	AT2G46020.2	ATBRM,BRM,CHA2,CHR2
Gorai.001G169100_D	20	6	9	SIGNAL PEPTIDE PEPTIDASE-LIKE 4	GO:0004190,GO:0016021	AT1G01650.1	ATSPPL4,SPPL4
Gorai.001G169300_A	2	4	54	U-box domain-containing protein kinase family protein	GO:0004672,GO:0005524,GO:0006468,GO:0004842,GO:0016567,GO:0000151	AT2G45910.1
Gorai.001G169800_D	12	2	6	RNAhelicase-like 8	GO:0003676,GO:0005524,GO:0008026,GO:0004386	AT4G00660.1	ATRH8,RH8
Gorai.001G170600_A	3	3	50	NAD(P)-binding Rossmann-fold superfamily protein	GO:0016491,GO:0008152	AT1G01800.1
Gorai.001G170800_A	9	15	19			AT4G00585.1
Gorai.001G171000_D	2	1	2	Homeobox-leucine zipper family protein / lipid-binding START domain-containing protein	GO:0003700,GO:0043565,GO:0006355	AT4G00730.1	AHDP,ANL2
Gorai.001G171700_D	1	2	1	F-box family protein		AT4G00755.1
Gorai.001G172000_D	2	1	6	SET domain-containing protein		AT1G01920.2
Gorai.001G173300_A	1	2	1	early nodulin-like protein 18	GO:0005507,GO:0009055	AT1G08500.1	AtENODL18,ENODL18
Gorai.001G173400_A	23	11	64	AAA-type ATPase family protein	GO:0005524,GO:0009378,GO:0006281,GO:0006310	AT2G45500.1
Gorai.001G173400_D	5	1	2	AAA-type ATPase family protein	GO:0005524,GO:0009378,GO:0006281,GO:0006310	AT2G45500.1
Gorai.001G174000_D	2	1	2	NAD(P)-binding Rossmann-fold superfamily protein	GO:0003854,GO:0016616,GO:0006694,GO:0055114,GO:0003824,GO:0050662,GO:0044237,GO:0009058	AT2G45400.1	BEN1
Gorai.001G174100_D	1	2	1	DHHC-type zinc finger family protein	GO:0008270	AT3G60800.1
Gorai.001G174700_A	2	4	2	golgi snare 12	GO:0016021,GO:0006888,GO:0005801,GO:0000139	AT2G45200.1	ATGOS12,GOS12
Gorai.001G175300_D	7	20	10	RGPR-related		AT5G47480.1
Gorai.001G175400_A	1	2	1	C2H2-like zinc finger protein		AT1G02030.1
Gorai.001G175800_D	6	30	12			AT3G60520.1
Gorai.001G176100_A	25	1	36	Polynucleotidyl transferase, ribonuclease H-like superfamily protein		AT5G65005.1
Gorai.001G176100_D	12	6	14	Polynucleotidyl transferase, ribonuclease H-like superfamily protein		AT5G65005.1
Gorai.001G176200_D	11	1	32	Translation elongation factor EFG/EF2 protein	GO:0003924,GO:0005525	AT1G45332.1
Gorai.001G177500_D	18	16	8			AT2G20515.1
Gorai.001G179300_A	2	1	32	casein kinase I-like 6	GO:0004672,GO:0005524,GO:0006468	AT4G28540.1	CKL6,PAPK1
Gorai.001G179300_D	2	1	2	casein kinase I-like 6	GO:0004672,GO:0005524,GO:0006468	AT4G28540.1	CKL6,PAPK1
Gorai.001G179400_A	9	2	1	vacuolar protein sorting-associated protein 2.3	GO:0015031	AT1G03950.1	VPS2.3
Gorai.001G179600_A	2	1	2	Calcium-binding EF-hand family protein		AT5G44090.1
Gorai.001G179800_D	2	1	2	Long-chain fatty alcohol dehydrogenase family protein	GO:0016614,GO:0050660,GO:0055114,GO:0009055,GO:0016491	AT4G28570.1
Gorai.001G180100_A	9	6	3	HISTIDINE TRIAD NUCLEOTIDE-BINDING 2		AT1G31160.1	HINT 2
Gorai.001G180500_D	5	4	52			AT5G44010.1
Gorai.001G180700_A	27	13	35	ribosomal protein S16	GO:0003735,GO:0006412,GO:0005622,GO:0005840	ATCG00050.1
Gorai.001G181000_D	45	10	6	Glutathione S-transferase family protein		AT5G44000.1
Gorai.001G181300_D	8	9	55	translocase of outer membrane 22-V		AT5G43970.1	ATTOM22-V,TOM22-V,TOM9-2
Gorai.001G181600_A	2	1	2	Nuclear transport factor 2 (NTF2) family protein with RNA binding (RRM-RBD-RNP motifs) domain	GO:0003676,GO:0006810,GO:0005622	AT5G43960.1
Gorai.001G181800_A	24	2	9	indole-3-acetic acid inducible 11	GO:0006355,GO:0005634	AT4G28640.2	IAA11
Gorai.001G182400_A	7	8	1	multidrug resistance-associated protein 5	GO:0005524,GO:0016887,GO:0042626,GO:0006810,GO:0055085,GO:0016021	AT1G04120.1	ABCC5,ATABCC5,ATMRP5,MRP5
Gorai.001G182700_A	1	2	1	GroES-like zinc-binding dehydrogenase family protein	GO:0008270,GO:0016491,GO:0055114	AT5G43940.1	ADH2,ATGSNOR1,GSNOR,HOT5,PAR2
Gorai.001G182800_D	26	11	44	Transducin family protein / WD-40 repeat family protein	GO:0005515	AT1G04140.2
Gorai.001G183000_D	10	1	11	C2 calcium/lipid-binding plant phosphoribosyltransferase family protein	GO:0005515	AT1G04150.1
Gorai.001G183300_D	1	2	16	CLIP-associated protein	GO:0005515	AT2G20190.1	ATCLASP,CLASP
Gorai.001G185700_D	5	12	5	Tetratricopeptide repeat (TPR)-like superfamily protein		AT5G48850.1	ATSDI1
Gorai.001G186000_D	1	6	1	vesicle-associated membrane protein 726	GO:0016192,GO:0016021	AT1G04760.1	ATVAMP726,VAMP726
Gorai.001G186100_D	12	12	16			AT4G13200.1
Gorai.001G186200_A	2	1	2	GTP-binding family protein	GO:0005525,GO:0015093,GO:0015684,GO:0016021,GO:0005622	AT3G07050.1
Gorai.001G186200_D	21	7	5	GTP-binding family protein	GO:0005525,GO:0015093,GO:0015684,GO:0016021,GO:0005622	AT3G07050.1
Gorai.001G186300_D	1	2	1	CLAVATA3/ESR-RELATED 44		AT4G13195.1	CLE44
Gorai.001G186800_A	2	1	2	Leucine-rich repeat protein kinase family protein	GO:0004672,GO:0005524,GO:0006468,GO:0005515	AT5G48740.1
Gorai.001G186800_D	2	1	2	Leucine-rich repeat protein kinase family protein	GO:0004672,GO:0005524,GO:0006468,GO:0005515	AT5G48740.1
Gorai.001G186900_A	7	8	75	Protein of unknown function, DUF593		AT4G13630.1
Gorai.001G187100_A	7	4	1	Helicase/SANT-associated, DNA binding protein		AT3G24870.1
Gorai.001G187700_A	14	3	12			AT3G11290.1
Gorai.001G187900_A	16	5	2	endoplasmic reticulum retention defective 2B	GO:0046923,GO:0006621,GO:0016021	AT3G25040.1	ERD2B
Gorai.001G188100_A	2	1	2	RING/U-box superfamily protein		AT5G48655.1
Gorai.001G188200_A	1	6	1
Gorai.001G188200_D	15	2	12
Gorai.001G188400_D	2	4	5			AT3G25130.1
Gorai.001G188500_D	7	7	75	Nucleotide-diphospho-sugar transferases superfamily protein	GO:0016757	AT3G25140.1	GAUT8,QUA1
Gorai.001G188600_A	15	1	16	cytochrome P450, family 82, subfamily C, polypeptide 4	GO:0005506,GO:0009055,GO:0016705,GO:0020037,GO:0055114	AT4G31940.1	CYP82C4
Gorai.001G189900_D	9	2	10	Got1/Sft2-like vescicle transport protein family	GO:0016192,GO:0016021,GO:0006810	AT4G26550.1
Gorai.001G190100_A	10	7	2			AT5G48240.1
Gorai.001G190200_D	4	4	21	ubiquitin-specific protease 20		AT4G17895.1	UBP20
Gorai.001G190400_A	7	7	48			AT2G04280.1
Gorai.001G190400_D	1	2	4			AT2G04280.1
Gorai.001G191000_A	10	1	9	Aldolase-type TIM barrel family protein	GO:0004425	AT5G48220.1
Gorai.001G192900_D	1	11	1	zinc-dependent activator protein-1	GO:0003700,GO:0043565,GO:0006355	AT2G04880.2	ATWRKY1,WRKY1,ZAP1
Gorai.001G193100_D	19	1	2	RNA-binding (RRM/RBD/RNP motifs) family protein	GO:0003676	AT3G07810.1
Gorai.001G195900_A	21	7	2	Phosphotyrosine protein phosphatases superfamily protein		AT1G05000.1
Gorai.001G196400_A	6	13	20	Major facilitator superfamily protein	GO:0005215,GO:0006857,GO:0016020	AT3G21670.1
Gorai.001G197100_A	12	2	10	NADH-ubiquinone dehydrogenase, mitochondrial, putative	GO:0009055,GO:0051536,GO:0016491,GO:0055114,GO:0016651	AT5G37510.2	CI76,EMB1467
Gorai.001G197400_A	20	6	9	Transducin/WD40 repeat-like superfamily protein	GO:0005515	AT1G10580.1
Gorai.001G197600_D	1	2	1	alpha/beta-Hydrolases superfamily protein	GO:0016787	AT2G32520.1
Gorai.001G197900_D	47	12	37	ribosomal protein S27	GO:0003735,GO:0006412,GO:0005622,GO:0005840	AT3G61110.1	ARS27A,RS27A
Gorai.001G198500_A	2	1	2	Polynucleotide adenylyltransferase family protein	GO:0003723,GO:0016779,GO:0006396	AT2G17580.1
Gorai.001G198500_D	2	1	2	Polynucleotide adenylyltransferase family protein	GO:0003723,GO:0016779,GO:0006396	AT2G17580.1
Gorai.001G198700_A	51	6	1	catalase 2	GO:0004096,GO:0020037,GO:0055114	AT4G35090.1	CAT2
Gorai.001G198900_D	9	2	8	high mobility group B4	GO:0005515,GO:0003677	AT2G17560.3	HMGB4,NFD04,NFD4
Gorai.001G199200_D	22	2	1	WUSCHEL related homeobox 13	GO:0003700,GO:0043565,GO:0006355	AT4G35550.1	ATWOX13,HB-4,WOX13
Gorai.001G199700_A	7	7	25	ribonuclease II family protein	GO:0003723,GO:0004540	AT2G17510.1	EMB2763
Gorai.001G199700_D	7	7	25	ribonuclease II family protein	GO:0003723,GO:0004540	AT2G17510.1	EMB2763
Gorai.001G200000_A	2	1	11	Seven transmembrane MLO family protein	GO:0008219,GO:0016021	AT2G17480.1	ATMLO8,MLO8
Gorai.001G200600_A	7	8	1	little nuclei1		AT1G67230.1	LINC1
Gorai.001G200900_D	10	7	11	Protein of unknown function, DUF593		AT5G16720.1
Gorai.001G201400_A	2	5	2	general regulatory factor 3	GO:0019904	AT5G38480.1	GRF3,RCI1
Gorai.001G201800_A	12	0	6	Ribulose bisphosphate carboxylase (small chain) family protein	GO:0016984,GO:0015977	AT5G38430.1
Gorai.001G201900_D	3	11	1			AT5G16110.1
Gorai.001G202000_A	20	2	9		GO:0008762,GO:0016491,GO:0050660,GO:0055114
Gorai.001G202300_D	5	4	2	Peptidyl-tRNA hydrolase family protein	GO:0004045,GO:0006412	AT5G38290.2
Gorai.001G202400_D	5	4	12
Gorai.001G202700_D	19	7	5	HEAT repeat-containing protein	GO:0005515	AT5G16210.1
Gorai.001G204400_A	9	2	18	microsomal glutathione s-transferase, putative		AT1G65820.1
Gorai.001G204600_A	2	1	2			AT5G17070.1
Gorai.001G204600_D	19	7	2			AT5G17070.1
Gorai.001G204700_D	2	1	2	eukaryotic release factor 1-3	GO:0016149,GO:0006415,GO:0005737	AT3G26618.1	ERF1-3
Gorai.001G204800_A	5	1	2	alpha/beta-Hydrolases superfamily protein	GO:0004806,GO:0006629,GO:0004091,GO:0016042	AT5G37710.1
Gorai.001G204900_A	2	12	2	O-Glycosyl hydrolases family 17 protein	GO:0004553,GO:0005975	AT1G66250.1
Gorai.001G204900_D	2	12	2	O-Glycosyl hydrolases family 17 protein	GO:0004553,GO:0005975	AT1G66250.1
Gorai.001G205100_A	4	4	52			AT5G16610.2
Gorai.001G205400_A	4	4	60	nucleic acid binding;methyltransferases		AT3G58470.1
Gorai.001G205500_D	1	2	1	glutamine dumper 4		AT2G24762.1	AtGDU4,GDU4
Gorai.001G205600_A	28	5	31	6-phosphogluconate dehydrogenase family protein	GO:0004616,GO:0050661,GO:0006098,GO:0055114	AT3G02360.1
Gorai.001G205800_A	22	6	30	basic leucine-zipper 42	GO:0003700,GO:0043565,GO:0046983,GO:0006355	AT3G30530.1	ATBZIP42,bZIP42
Gorai.001G206300_A	2	1	2	O-fucosyltransferase family protein		AT5G15740.1
Gorai.001G206900_D	13	6	8	Pollen Ole e 1 allergen and extensin family protein		AT5G15780.1
Gorai.001G207000_A	11	18	2			AT5G38880.1
Gorai.001G207000_D	19	7	5			AT5G38880.1
Gorai.001G207200_D	1	2	1	Thioredoxin superfamily protein	GO:0015035,GO:0030288	AT5G38900.1
Gorai.001G208900_A	33	2	1	Malectin/receptor-like protein kinase family protein		AT3G51550.1	FER
Gorai.001G210300_D	1	2	1	Malectin/receptor-like protein kinase family protein	GO:0004672,GO:0005524,GO:0006468	AT3G51550.1	FER
Gorai.001G210700_A	6	2	17	Malectin/receptor-like protein kinase family protein	GO:0004672,GO:0005524,GO:0006468	AT3G51550.1	FER
Gorai.001G211000_D	9	2	3			AT1G06660.1
Gorai.001G211100_A	9	2	27	Pleckstrin homology (PH) domain-containing protein	GO:0005515,GO:0005543	AT2G30880.1
Gorai.001G211100_D	9	6	22	Pleckstrin homology (PH) domain-containing protein	GO:0005515,GO:0005543	AT2G30880.1
Gorai.001G212500_A	22	6	1	2-oxoglutarate (2OG) and Fe(II)-dependent oxygenase superfamily protein	GO:0016491,GO:0016706,GO:0055114	AT1G14130.1
Gorai.001G212700_A	1	2	1	RING/U-box superfamily protein		AT5G41450.1
Gorai.001G212800_A	9	6	12	Cysteine proteinases superfamily protein		AT3G22260.1
Gorai.001G213400_A	11	5	2	Ribosomal L27e protein family	GO:0003735,GO:0006412,GO:0005622,GO:0005840	AT4G15000.1
Gorai.001G213900_D	5	10	12	phosphorylcholine cytidylyltransferase	GO:0016779,GO:0009058	AT2G32260.1	ATCCT1,CCT1
Gorai.001G214500_D	10	1	5	Carbohydrate-binding X8 domain superfamily protein		AT1G79480.1
Gorai.001G214900_A	5	38	2			AT4G14970.1
Gorai.001G216200_D	2	1	6	Lycopene beta/epsilon cyclase protein	GO:0016705,GO:0016117	AT2G32640.1
Gorai.001G216600_A	26	8	3	Nodulin MtN21 /EamA-like transporter family protein	GO:0016020	AT2G05755.1
Gorai.001G217000_D	2	1	2	ARM repeat superfamily protein	GO:0005515	AT2G05810.1
Gorai.001G218100_D	2	1	83	transferases, transferring glycosyl groups	GO:0008915,GO:0009245	AT2G04560.1
Gorai.001G218200_D	1	2	10			AT5G35690.1
Gorai.001G218400_A	9	15	19	Nucleic acid-binding, OB-fold-like protein	GO:0003723,GO:0003743,GO:0006413	AT2G04520.1
Gorai.001G218400_D	9	15	19	Nucleic acid-binding, OB-fold-like protein	GO:0003723,GO:0003743,GO:0006413	AT2G04520.1
Gorai.001G218800_A	10	7	9	Ypt/Rab-GAP domain of gyp1p superfamily protein	GO:0005097,GO:0032313,GO:0005622	AT3G07890.1
Gorai.001G218900_D	20	6	1	fimbrin-like protein 2	GO:0005515	AT5G35700.1	FIM2
Gorai.001G219900_D	15	4	12	RNA-binding (RRM/RBD/RNP motifs) family protein	GO:0003676	AT3G07810.1
Gorai.001G220100_A	11	1	2	RNA-binding (RRM/RBD/RNP motifs) family protein	GO:0003676	AT3G07810.1
Gorai.001G220300_A	14	3	5	Auxin-responsive family protein		AT5G35735.1
Gorai.001G220500_A	12	7	25	Protein of unknown function (DUF1423)		AT5G48160.1	OBE2
Gorai.001G221100_A	7	7	6	Nucleoporin, Nup133/Nup155-like		AT2G05120.1
Gorai.001G221700_A	20	10	9	beta-1,2-N-acetylglucosaminyltransferase II	GO:0008455,GO:0009312,GO:0005795,GO:0016021	AT2G05320.1
Gorai.001G224900_A	1	2	1
Gorai.001G226300_A	21	1	2	Thioesterase/thiol ester dehydrase-isomerase superfamily protein		AT5G48370.2
Gorai.001G226300_D	2	1	2	Thioesterase/thiol ester dehydrase-isomerase superfamily protein		AT5G48370.2
Gorai.001G226600_A	1	2	1	UDP-glycosyltransferase 74 F1	GO:0016758,GO:0008152	AT2G43840.2	UGT74F1
Gorai.001G226700_A	1	2	25	BAK1-interacting receptor-like kinase 1	GO:0004672,GO:0005524,GO:0006468,GO:0005515	AT5G48380.1	BIR1
Gorai.001G228000_A	20	2	9	2Fe-2S ferredoxin-like superfamily protein		AT3G07480.1
Gorai.001G228200_A	8	2	3	Protein of unknown function, DUF538		AT3G07470.1
Gorai.001G228200_D	8	9	3	Protein of unknown function, DUF538		AT3G07470.1
Gorai.001G228300_D	8	2	3
Gorai.001G228500_D	1	2	1	ILI1 binding bHLH 1		AT2G43060.1	IBH1
Gorai.001G229200_A	2	1	2	RAB GTPase homolog A5E	GO:0005525,GO:0007264,GO:0005622	AT1G05810.1	ARA,ARA-1,ATRAB11D,ATRABA5E,RABA5E
Gorai.001G229200_D	46	12	11	RAB GTPase homolog A5E	GO:0005525,GO:0007264,GO:0005622	AT1G05810.1	ARA,ARA-1,ATRAB11D,ATRABA5E,RABA5E
Gorai.001G230200_A	9	2	20	O-Glycosyl hydrolases family 17 protein	GO:0004553,GO:0005975	AT3G07320.1
Gorai.001G230300_D	6	3	18	Oxidoreductase, zinc-binding dehydrogenase family protein	GO:0008270,GO:0016491,GO:0055114	AT4G13010.1
Gorai.001G230800_D	6	2	1	Oxidoreductase, zinc-binding dehydrogenase family protein	GO:0008270,GO:0016491,GO:0055114	AT4G13010.1
Gorai.001G231000_A	28	10	48	GTP cyclohydrolase I		AT3G07270.1
Gorai.001G232400_D	1	2	71	RPM1 interacting protein 4		AT3G25070.1	RIN4
Gorai.001G232500_A	2	1	2	B-cell receptor-associated protein 31-like	GO:0006886,GO:0005783,GO:0016021	AT5G48660.1
Gorai.001G232800_A	2	1	2	Sterile alpha motif (SAM) domain-containing protein	GO:0005515	AT3G07170.1
Gorai.001G232900_D	6	2	18	ubiquitin-associated (UBA)/TS-N domain-containing protein		AT1G04850.1
Gorai.001G233700_A	1	15	38	Homeodomain-like superfamily protein		AT3G24860.1
Gorai.001G233800_A	7	12	1	Helicase/SANT-associated, DNA binding protein		AT3G24870.1
Gorai.001G234100_A	6	2	18	LEUNIG_homolog	GO:0005515,GO:0030528,GO:0003697	AT2G32700.6	LUH
Gorai.001G234900_D	25	28	2	phytochrome interacting factor 3-like 5	GO:0030528,GO:0006355	AT2G20180.2	PIF1,PIL5
Gorai.001G235200_D	1	2	4	response regulator 24	GO:0000156,GO:0000160,GO:0006355	AT5G26594.1	ARR24,RR24
Gorai.001G235400_D	6	11	10	CLIP-associated protein	GO:0005515	AT2G20190.1	ATCLASP,CLASP
Gorai.001G235600_A	2	1	2	Protein of unknown function (DUF3741)		AT4G28760.1
Gorai.001G235600_D	2	1	2	Protein of unknown function (DUF3741)		AT4G28760.1
Gorai.001G236000_A	2	1	8	glutathione S-transferase TAU 23		AT1G78320.1	ATGSTU23,GSTU23
Gorai.001G236100_A	2	1	2	Glutaredoxin family protein	GO:0009055,GO:0015035,GO:0045454	AT4G28730.1
Gorai.001G236400_A	22	6	81	RmlC-like cupins superfamily protein		AT3G04300.1
Gorai.001G236400_D	1	2	16	RmlC-like cupins superfamily protein		AT3G04300.1
Gorai.001G237200_D	7	1	44	Transducin/WD40 repeat-like superfamily protein	GO:0005515	AT2G20330.1
Gorai.001G238100_A	1	2	1	cellulose synthase A4	GO:0016760,GO:0030244,GO:0016020	AT5G44030.1	CESA4,IRX5,NWS2
Gorai.001G238100_D	1	2	1	cellulose synthase A4	GO:0016760,GO:0030244,GO:0016020	AT5G44030.1	CESA4,IRX5,NWS2
Gorai.001G238200_D	15	5	12	phytochelatin synthase 1 (PCS1)	GO:0016756,GO:0046872,GO:0010038,GO:0046938	AT5G44070.1	ARA8,ATPCS1,CAD1,PCS1
Gorai.001G239600_D	9	2	20	ytochrome p450, family 71, subfamily B, polypeptide 11	GO:0005506,GO:0009055,GO:0016705,GO:0020037,GO:0055114	AT5G25120.1	CYP71B11
Gorai.001G239800_D	1	2	1			AT3G29034.1
Gorai.001G239900_D	1	2	31	Pentatricopeptide repeat (PPR) superfamily protein		AT5G15300.1
Gorai.001G240000_D	35	1	28	Pyridoxal phosphate (PLP)-dependent transferases superfamily protein	GO:0008152,GO:0030170,GO:0006520,GO:0016829	AT3G01120.1	ATCYS1,CGS,CGS1,MTO1
Gorai.001G240600_A	8	9	19			AT5G39570.1
Gorai.001G240900_A	8	2	3	Vesicle transport v-SNARE family protein	GO:0006886,GO:0016020	AT5G39510.1	ATVTI11,ATVTI1A,SGR4,VTI11,VTI1A,ZIG,ZIG1
Gorai.001G241100_A	1	13	31	Protein of unknown function (DUF1336)		AT3G29180.1
Gorai.001G242400_D	9	9	12	Guanylate-binding family protein	GO:0003924,GO:0005525	AT2G38840.1
Gorai.001G242700_A	1	2	19	Primosome PriB/single-strand DNA-binding	GO:0003697,GO:0006260	AT1G47720.1	OSB1
Gorai.001G242900_A	3	2	71	indole-3-acetic acid 7	GO:0006355,GO:0005634	AT3G23050.1	AXR2,IAA7
Gorai.001G243100_D	16	1	6	RNI-like superfamily protein	GO:0005515	AT3G54650.1	FBL17
Gorai.001G243200_A	2	1	6	RNA polymerase Rpb7 N-terminal domain-containing protein	GO:0003899,GO:0006351	AT1G06790.1
Gorai.001G243400_A	8	2	3	galacturonosyltransferase 6	GO:0016757	AT1G06780.1	GAUT6
Gorai.001G243700_A	19	1	25	basic pentacysteine 4		AT2G21240.1	ATBPC4,BBR,BPC4
Gorai.001G243800_A	2	1	2	Basic-leucine zipper (bZIP) transcription factor family protein	GO:0003700,GO:0043565,GO:0046983,GO:0006355	AT4G38900.2
Gorai.001G247300_A	1	2	1	Plant protein of unknown function (DUF828)		AT5G01360.1	TBL3
Gorai.001G247300_D	1	2	1	Plant protein of unknown function (DUF828)		AT5G01360.1	TBL3
Gorai.001G247500_A	22	6	1	ARGOS-like		AT2G44080.1	ARL
Gorai.001G247500_D	22	2	1	ARGOS-like		AT2G44080.1	ARL
Gorai.001G248100_A	2	1	2	importin alpha isoform 9	GO:0005515	AT5G03070.1	IMPA-9
Gorai.001G248100_D	19	1	2	importin alpha isoform 9	GO:0005515	AT5G03070.1	IMPA-9
Gorai.001G248200_D	2	1	2	IQ-domain 2		AT5G03040.1	iqd2
Gorai.001G251900_A	2	1	11	basic helix-loop-helix (bHLH) DNA-binding superfamily protein		AT1G06150.1	EMB1444
Gorai.001G251900_D	2	1	2	basic helix-loop-helix (bHLH) DNA-binding superfamily protein		AT1G06150.1	EMB1444
Gorai.001G253500_A	2	1	2			AT3G49990.1
Gorai.001G253800_A	10	12	13	Structural maintenance of chromosomes (SMC) family protein	GO:0005515,GO:0005524,GO:0051276,GO:0005694	AT3G54670.3	ATSMC1,SMC1,TTN8
Gorai.001G253900_D	10	1	5	ENTH/VHS/GAT family protein	GO:0006886,GO:0005622	AT1G06210.1
Gorai.001G254000_D	28	10	4	Peptidase S24/S26A/S26B/S26C family protein		AT2G31140.1
Gorai.001G254100_A	2	1	2	ARM repeat superfamily protein	GO:0005515,GO:0004842,GO:0016567,GO:0000151	AT3G54790.1
Gorai.001G254100_D	2	1	5	ARM repeat superfamily protein	GO:0005515,GO:0004842,GO:0016567,GO:0000151	AT3G54790.1
Gorai.001G254400_A	1	2	1	non-intrinsic ABC protein 4	GO:0006897,GO:0016020	AT1G03900.1	ATNAP4,NAP4
Gorai.001G254400_D	1	2	1	non-intrinsic ABC protein 4	GO:0006897,GO:0016020	AT1G03900.1	ATNAP4,NAP4
Gorai.001G254500_D	9	2	4	P-loop containing nucleoside triphosphate hydrolases superfamily protein		AT1G03905.1
Gorai.001G255000_A	4	1	2	Ypt/Rab-GAP domain of gyp1p superfamily protein	GO:0005097,GO:0032313,GO:0005622	AT4G28550.1
Gorai.001G255000_D	5	4	2	Ypt/Rab-GAP domain of gyp1p superfamily protein	GO:0005097,GO:0032313,GO:0005622	AT4G28550.1
Gorai.001G256400_D	2	1	2		GO:0016491,GO:0055114	AT3G28760.1
Gorai.001G256700_A	20	2	9	nonsense-mediated mRNA decay NMD3 family protein		AT2G03820.1
Gorai.001G257000_A	15	9	26	ATPase, V0/A0 complex, subunit C/D	GO:0015078,GO:0015991,GO:0033177	AT3G28715.1
Gorai.001G257700_D	1	2	1	Leucine-rich repeat protein kinase family protein	GO:0004672,GO:0005524,GO:0006468,GO:0005515	AT3G28450.1
Gorai.001G257800_A	14	1	18	CLAVATA3/ESR-RELATED 25		AT3G28455.1	CLE25
Gorai.001G258100_D	35	2	28	AAA-ATPase 1	GO:0005524,GO:0009378,GO:0006281,GO:0006310	AT5G40010.1	AATP1
Gorai.001G258200_A	1	2	1	CVP2 like 1		AT2G32010.1	CVL1
Gorai.001G258600_A	11	10	2	golgi alpha-mannosidase II	GO:0004559,GO:0005975,GO:0015923,GO:0006013,GO:0004553,GO:0008270	AT5G14950.1	ATGMII,GMII
Gorai.001G258700_A	5	1	5	ADP-glucose pyrophosphorylase family protein	GO:0016779,GO:0009058	AT1G74910.1
Gorai.001G259000_A	9	2	10	Pyridoxamine 5\'-phosphate oxidase family protein		AT2G04690.1
Gorai.001G259000_D	9	2	19	Pyridoxamine 5\'-phosphate oxidase family protein		AT2G04690.1
Gorai.001G259200_A	5	3	2	zinc finger (AN1-like) family protein	GO:0008270	AT3G28210.1	PMZ,SAP12
Gorai.001G259200_D	5	3	2	zinc finger (AN1-like) family protein	GO:0008270	AT3G28210.1	PMZ,SAP12
Gorai.001G260300_A	15	11	6	nodulin MtN21 /EamA-like transporter family protein	GO:0016020	AT5G40240.1
Gorai.001G260300_D	1	2	1	nodulin MtN21 /EamA-like transporter family protein	GO:0016020	AT5G40240.1
Gorai.001G260400_D	24	1	9	5\'-3\' exonuclease family protein	GO:0004518,GO:0006281,GO:0006289,GO:0005634,GO:0004519,GO:0003697	AT3G28030.1	UVH3,UVR1
Gorai.001G261100_A	1	2	1	aldehyde dehydrogenase 2B4	GO:0016491,GO:0008152,GO:0055114	AT3G48000.1	ALDH2,ALDH2A,ALDH2B4
Gorai.001G261300_D	19	7	25	Protein kinase superfamily protein	GO:0004672,GO:0005524,GO:0006468	AT3G01490.1
Gorai.001G261400_A	1	2	20	formate dehydrogenase	GO:0016616,GO:0051287,GO:0008152,GO:0055114,GO:0048037,GO:0004616,GO:0006098	AT5G14780.1	FDH
Gorai.001G261500_A	15	2	5	Uncharacterised protein family (UPF0497)		AT5G40300.1
Gorai.001G261700_A	1	2	1	UDP-glucosyl transferase 88A1	GO:0016758,GO:0008152,GO:0030246,GO:0005975,GO:0030259	AT3G16520.3	UGT88A1
Gorai.001G262100_A	2	1	2	GDSL-like Lipase/Acylhydrolase superfamily protein	GO:0016788,GO:0006629	AT3G27950.1
Gorai.001G262100_D	2	1	2	GDSL-like Lipase/Acylhydrolase superfamily protein	GO:0016788,GO:0006629	AT3G27950.1
Gorai.001G262200_D	1	2	1	L-aspartate oxidase	GO:0009055,GO:0016491,GO:0055114	AT5G14760.1	AO
Gorai.001G262300_A	15	1	12			AT3G27930.1
Gorai.001G262300_D	11	1	8			AT3G27930.1
Gorai.001G262500_A	21	1	5	like SEX4 1	GO:0008138,GO:0006470	AT3G01510.1	LSF1
Gorai.001G262500_D	2	1	2	like SEX4 1	GO:0008138,GO:0006470	AT3G01510.1	LSF1
Gorai.001G263300_D	35	4	28	ADP-ribosylation factor A1F	GO:0005525,GO:0007264,GO:0004871,GO:0019001,GO:0007186,GO:0005634,GO:0005737,GO:0005622	AT1G10630.1	ARFA1F,ATARFA1F
Gorai.001G263700_D	20	5	9	cysteine-rich RLK (RECEPTOR-like protein kinase) 42	GO:0004672,GO:0005524,GO:0006468	AT5G40380.1	CRK42
Gorai.001G264700_A	2	7	2	pescadillo-related	GO:0005622,GO:0042254,GO:0005730,GO:0008283	AT5G14520.1
Gorai.001G265000_D	33	2	19	RNI-like superfamily protein		AT5G40470.1
Gorai.001G265200_A	2	1	12	UDP-Glycosyltransferase superfamily protein	GO:0016758,GO:0008152	AT2G16890.2
Gorai.001G266100_D	2	1	6	Protein kinase superfamily protein	GO:0004672,GO:0005524,GO:0006468	AT3G27560.1	ATN1
Gorai.001G267000_A	5	1	27	GTP-binding 2	GO:0005525,GO:0007264,GO:0005634,GO:0005737,GO:0005622	AT4G35860.1	ATGB2,ATRAB2C,ATRABB1B,GB2
Gorai.001G267200_D	2	1	49	Ku70-binding family protein	GO:0004222	AT3G03420.1
Gorai.001G267800_A	9	6	26	alpha-soluble NSF attachment protein 2	GO:0006886	AT3G56190.1	ALPHA-SNAP2,ASNAP
Gorai.001G267800_D	9	5	26	alpha-soluble NSF attachment protein 2	GO:0006886	AT3G56190.1	ALPHA-SNAP2,ASNAP
Gorai.001G268100_D	8	2	3	alpha/beta-Hydrolases superfamily protein	GO:0016787,GO:0008152	AT3G27320.2
Gorai.001G268200_A	9	2	20	Protein phosphatase 2A regulatory B subunit family protein	GO:0008601,GO:0007165,GO:0000159	AT3G26020.1
Gorai.001G268300_A	12	2	2	glucose-6-phosphate dehydrogenase 6	GO:0004345,GO:0050661,GO:0006006,GO:0055114	AT5G40760.1	G6PD6
Gorai.001G268300_D	12	2	2	glucose-6-phosphate dehydrogenase 6	GO:0004345,GO:0050661,GO:0006006,GO:0055114	AT5G40760.1	G6PD6
Gorai.001G268400_A	19	1	55	Ribonuclease inhibitor	GO:0005515	AT3G26000.1
Gorai.001G268500_D	2	7	2	glyceraldehyde-3-phosphate dehydrogenase C2	GO:0016620,GO:0055114	AT1G13440.1	GAPC-2,GAPC2
Gorai.001G268600_A	1	2	20	lysine histidine transporter 1		AT5G40780.1	LHT1
Gorai.001G269300_D	1	2	1			AT3G01810.1
Gorai.001G269400_D	1	2	3	P-loop containing nucleoside triphosphate hydrolases superfamily protein	GO:0005524,GO:0019205,GO:0006139	AT3G01820.1
Gorai.001G269900_A	6	3	9			AT3G01860.1
Gorai.001G270100_D	2	1	2	uridine kinase/uracil phosphoribosyltransferase 1	GO:0009116,GO:0005524,GO:0016301,GO:0008152	AT5G40870.1	ATUK/UPRT1,UK/UPRT1,UKL1
Gorai.001G271700_A	5	5	2	zinc ion binding;nucleic acid binding;zinc ion binding		AT5G14140.1
Gorai.001G271700_D	9	15	28	zinc ion binding;nucleic acid binding;zinc ion binding		AT5G14140.1
Gorai.001G271800_D	22	6	3	Peroxidase superfamily protein	GO:0004601,GO:0020037,GO:0006979,GO:0055114	AT5G14130.1
Gorai.001G272100_D	4	4	7	Polynucleotidyl transferase, ribonuclease H-like superfamily protein		AT4G09490.1
Gorai.001G272400_A	12	6	31	HXXXD-type acyl-transferase family protein	GO:0016747	AT1G28680.1
Gorai.001G272400_D	30	5	50	HXXXD-type acyl-transferase family protein	GO:0016747	AT1G28680.1
Gorai.001G272700_D	5	1	22			AT3G27030.1
Gorai.001G272800_A	14	12	18	Protein of unknown function (DUF 3339)		AT3G27027.1
Gorai.001G272800_D	14	1	22	Protein of unknown function (DUF 3339)		AT3G27027.1
Gorai.001G273200_D	1	2	3	NAD(P)-binding Rossmann-fold superfamily protein	GO:0016491,GO:0008152	AT3G01980.1
Gorai.001G274100_A	2	1	2	Uncharacterised protein family (UPF0497)		AT4G25040.1
Gorai.001G274300_A	8	9	4			AT3G26890.1
Gorai.001G275200_A	8	10	3	actin related protein 2		AT3G27000.1	ARP2,ATARP2,WRM
Gorai.001G276400_D	2	27	2	glyceraldehyde 3-phosphate dehydrogenase A subunit 2	GO:0016620,GO:0055114	AT1G12900.1	GAPA-2
Gorai.002G000100_A	4	1	42	ATP binding;valine-tRNA ligases;aminoacyl-tRNA ligases;nucleotide binding;ATP binding;aminoacyl-tRNA ligases	GO:0000166,GO:0004812,GO:0005524,GO:0006418,GO:0005737,GO:0006412,GO:0006438,GO:0004832	AT5G16715.1	EMB2247
Gorai.002G000400_D	5	1	83	RING/U-box superfamily protein		AT5G45290.1
Gorai.002G000600_D	5	1	15
Gorai.002G000700_D	9	36	53	Cytochrome c oxidase biogenesis protein Cmc1-like		AT4G21192.1
Gorai.002G000800_D	7	11	1	MuDR family transposase	GO:0008270	AT1G64260.1
Gorai.002G001200_D	2	1	5	Acyl transferase/acyl hydrolase/lysophospholipase superfamily protein	GO:0006629	AT1G33270.1
Gorai.002G001400_D	1	2	1	Late embryogenesis abundant (LEA) hydroxyproline-rich glycoprotein family		AT2G01080.1
Gorai.002G001500_A	1	2	17	actin 7		AT5G09810.1	ACT7
Gorai.002G002200_D	21	7	2	transportin 1	GO:0005515,GO:0008565,GO:0006886	AT2G16950.2	ATTRN1,TRN1
Gorai.002G002300_A	4	8	23	Splicing factor, CC1-like	GO:0003676	AT2G16940.1
Gorai.002G002400_D	12	1	16	Protein of unknown function (DUF1279)		AT2G20940.1
Gorai.002G003300_A	15	29	20	synaptotagmin A	GO:0005515	AT2G20990.1	ATSYTA,NTMC2T1.1,NTMC2TYPE1.1,SYT1,SYTA
Gorai.002G003300_D	5	1	26	synaptotagmin A	GO:0005515	AT2G20990.1	ATSYTA,NTMC2T1.1,NTMC2TYPE1.1,SYT1,SYTA
Gorai.002G003700_A	25	2	10	2-oxoglutarate (2OG) and Fe(II)-dependent oxygenase superfamily protein	GO:0016491,GO:0016706,GO:0055114	AT3G19000.1
Gorai.002G003800_A	25	2	36	rotamase CYP 3	GO:0003755,GO:0006457	AT2G16600.1	ROC3
Gorai.002G003900_D	5	2	2	NAD(P)-linked oxidoreductase superfamily protein	GO:0055114,GO:0016491	AT2G21250.1
Gorai.002G004600_D	19	1	2	Kinesin motor family protein	GO:0003777,GO:0005524,GO:0007018	AT4G39050.1
Gorai.002G004800_A	5	1	2	vacuolar proton ATPase A3	GO:0015078,GO:0015991,GO:0033177	AT4G39080.1	VHA-A3
Gorai.002G004900_A	2	1	2	Transducin/WD40 repeat-like superfamily protein	GO:0005515	AT2G16405.1
Gorai.002G004900_D	11	1	49	Transducin/WD40 repeat-like superfamily protein	GO:0005515	AT2G16405.1
Gorai.002G005000_A	1	2	1	PHD finger family protein / bromo-adjacent homology (BAH) domain-containing protein	GO:0005515,GO:0003677	AT4G22140.1	EBS
Gorai.002G005200_A	21	1	5	thymidylate synthase 1	GO:0004146,GO:0006545,GO:0009165,GO:0055114,GO:0004799,GO:0006231	AT2G16370.1	THY-1
Gorai.002G005200_D	10	4	2	thymidylate synthase 1	GO:0004146,GO:0006545,GO:0009165,GO:0055114,GO:0004799,GO:0006231	AT2G16370.1	THY-1
Gorai.002G005700_A	13	5	2	3-ketoacyl-CoA synthase 4	GO:0016746,GO:0016747,GO:0006633,GO:0016020,GO:0008610	AT1G19440.1	KCS4
Gorai.002G006500_A	21	1	5	AP2/B3-like transcriptional factor family protein	GO:0003677,GO:0006355	AT3G18990.1	REM39,VRN1
Gorai.002G006700_D	1	6	1	2-oxoglutarate (2OG) and Fe(II)-dependent oxygenase superfamily protein	GO:0016491,GO:0016706,GO:0055114	AT3G19000.1
Gorai.002G006900_A	9	2	3	Protein kinase superfamily protein	GO:0004672,GO:0005524,GO:0006468	AT4G33950.1	ATOST1,OST1,P44,SNRK2-6,SNRK2.6,SRK2E
Gorai.002G006900_D	20	2	8	Protein kinase superfamily protein	GO:0004672,GO:0005524,GO:0006468	AT4G33950.1	ATOST1,OST1,P44,SNRK2-6,SNRK2.6,SRK2E
Gorai.002G007100_D	11	1	2	ARM repeat superfamily protein		AT4G33945.1
Gorai.002G007500_D	25	2	37	Protein of unknown function DUF829, transmembrane 53		AT2G15695.1
Gorai.002G008000_A	2	1	7			AT4G34412.1
Gorai.002G008200_A	12	2	43	fucosyltransferase 11	GO:0008417,GO:0006486,GO:0016020	AT3G19280.1	ATFUT11,FUCT1,FUCTA,FUT11
Gorai.002G008400_A	16	5	43	Ribosomal protein S5 domain 2-like superfamily protein	GO:0003735,GO:0006412,GO:0005622,GO:0005840	AT2G09990.1
Gorai.002G008800_D	8	9	36	Calcium-dependent lipid-binding (CaLB domain) family protein	GO:0005515	AT4G34150.1
Gorai.002G009200_A	33	10	3	Domain of unknown function (DUF303)		AT4G34215.1
Gorai.002G009400_A	2	1	2	UNC-50 family protein		AT2G15240.1
Gorai.002G009700_D	12	6	84			AT2G14910.1
Gorai.002G010000_D	12	6	1			AT4G33890.1
Gorai.002G010400_A	2	1	22	3\'-5\'-exoribonuclease family protein	GO:0003723,GO:0006396	AT1G60080.1
Gorai.002G011200_A	26	8	1	target of rapamycin	GO:0016773,GO:0005515,GO:0016772	AT1G50030.1	TOR
Gorai.002G011300_D	1	2	1	MATE efflux family protein	GO:0015238,GO:0015297,GO:0006855,GO:0055085,GO:0016020	AT1G47530.1
Gorai.002G012000_D	7	1	1	Chaperone DnaJ-domain superfamily protein	GO:0031072	AT5G64360.2
Gorai.002G012300_A	1	2	34	SNARE-like superfamily protein		AT4G10170.1
Gorai.002G012800_A	1	2	4	pumilio 7	GO:0003723	AT1G78160.1	APUM7,PUM7
Gorai.002G012800_D	9	2	10	pumilio 7	GO:0003723	AT1G78160.1	APUM7,PUM7
Gorai.002G013300_A	8	2	3			AT5G64090.1
Gorai.002G013300_D	8	2	19			AT5G64090.1
Gorai.002G013600_A	25	1	23	galacturonosyltransferase 3	GO:0016757	AT4G38270.1	GAUT3
Gorai.002G014400_D	12	4	3	tonoplast monosaccharide transporter2	GO:0022857,GO:0055085,GO:0016021	AT4G35300.1	TMT2
Gorai.002G015000_D	14	1	5	Calcineurin-like metallo-phosphoesterase superfamily protein	GO:0016787	AT1G50370.1
Gorai.002G015200_A	1	6	1	P-loop containing nucleoside triphosphate hydrolases superfamily protein		AT1G05460.1	SDE3
Gorai.002G015200_D	12	4	1	P-loop containing nucleoside triphosphate hydrolases superfamily protein		AT1G05460.1	SDE3
Gorai.002G015500_A	1	2	1	RING/U-box superfamily protein		AT3G19910.1
Gorai.002G015500_D	1	2	1	RING/U-box superfamily protein		AT3G19910.1
Gorai.002G015600_D	1	15	4	DNAJ heat shock N-terminal domain-containing protein	GO:0031072	AT5G23240.1
Gorai.002G015800_A	2	7	2	nucleolin like 2	GO:0003676	AT3G18610.1	ATNUC-L2,NUC-L2,PARLL1
Gorai.002G016300_A	2	1	11	histone-lysine N-methyltransferase ATXR2	GO:0005515,GO:0008270	AT3G21820.1	ATXR2,SDG36
Gorai.002G016500_A	9	2	19	basic helix-loop-helix (bHLH) DNA-binding superfamily protein	GO:0030528,GO:0006355	AT5G54680.1	bHLH105,ILR3
Gorai.002G016500_D	9	2	3	basic helix-loop-helix (bHLH) DNA-binding superfamily protein	GO:0030528,GO:0006355	AT5G54680.1	bHLH105,ILR3
Gorai.002G016700_A	6	3	1
Gorai.002G017000_D	6	6	16	Wound-responsive family protein		AT4G28240.1
Gorai.002G017100_A	10	1	2	zinc ion binding	GO:0006886,GO:0016192	AT1G12470.1
Gorai.002G017100_D	11	1	2	zinc ion binding	GO:0006886,GO:0016192	AT1G12470.1
Gorai.002G017200_A	26	7	1	Core-2/I-branching beta-1,6-N-acetylglucosaminyltransferase family protein	GO:0008375,GO:0016020	AT1G03520.1
Gorai.002G018100_D	1	2	1	RING membrane-anchor 1		AT4G03510.1	ATRMA1,RMA1
Gorai.002G018200_A	15	1	12	Ubiquitin-conjugating enzyme family protein	GO:0016881	AT1G53025.1
Gorai.002G019800_D	1	2	1	Leucine-rich repeat (LRR) family protein	GO:0005515	AT4G28380.1
Gorai.002G020200_A	2	7	2	26S proteasome regulatory subunit S2 1A		AT2G20580.1	ATRPN1A,RPN1A
Gorai.002G020500_A	6	6	20	DNAJ heat shock family protein	GO:0031072,GO:0051082,GO:0006457	AT2G20560.1
Gorai.002G020500_D	6	2	5	DNAJ heat shock family protein	GO:0031072,GO:0051082,GO:0006457	AT2G20560.1
Gorai.002G020600_A	6	6	20	acyl-CoA oxidase 3	GO:0016627,GO:0055114,GO:0003997,GO:0006635,GO:0005777,GO:0003995	AT1G06290.1	ACX3,ATACX3
Gorai.002G020600_D	6	2	18	acyl-CoA oxidase 3	GO:0016627,GO:0055114,GO:0003997,GO:0006635,GO:0005777,GO:0003995	AT1G06290.1	ACX3,ATACX3
Gorai.002G021200_D	2	1	2	Sec14p-like phosphatidylinositol transfer family protein		AT1G01630.1
Gorai.002G021300_A	8	9	27	Ubiquinol-cytochrome C reductase iron-sulfur subunit	GO:0016491,GO:0051537,GO:0055114,GO:0008121,GO:0016679	AT5G13430.1
Gorai.002G021300_D	12	6	27	Ubiquinol-cytochrome C reductase iron-sulfur subunit	GO:0016491,GO:0051537,GO:0055114,GO:0008121,GO:0016679	AT5G13430.1
Gorai.002G021400_D	12	1	36			AT1G28140.1
Gorai.002G021600_A	1	2	1	Homeodomain-like superfamily protein		AT2G33550.1
Gorai.002G021800_D	1	2	4	jasmonate-zim-domain protein 10	GO:0005515	AT5G13220.1	JAS1,JAZ10,TIFY9
Gorai.002G021900_A	1	2	16	GRAM domain family protein		AT5G13200.1
Gorai.002G022800_D	2	1	2	Protein kinase superfamily protein	GO:0004672,GO:0005524,GO:0006468	AT5G13160.1	PBS1
Gorai.002G023200_A	10	1	96	glucose-6-phosphate dehydrogenase 2	GO:0004345,GO:0050661,GO:0006006,GO:0055114	AT5G13110.1	G6PD2
Gorai.002G023400_D	1	2	1	FtsH extracellular protease family	GO:0005524,GO:0004222,GO:0006508,GO:0016887	AT2G30950.1	FTSH2,VAR2
Gorai.002G023500_A	10	1	14	ABC transporter family protein	GO:0005524,GO:0016887,GO:0006810,GO:0005622,GO:0005215,GO:0009276,GO:0016021,GO:0016020	AT1G54350.1
Gorai.002G024700_D	1	2	1	Polyketide cyclase/dehydrase and lipid transport superfamily protein		AT4G14500.1
Gorai.002G025000_A	2	1	2	HR-like lesion-inducing protein-related		AT1G04340.1
Gorai.002G025100_D	6	3	80	3-hydroxyacyl-CoA dehydratase 1	GO:0003824,GO:0008152	AT4G14440.1	ATECI3,ECI3,HCD1
Gorai.002G025200_A	29	2	29	3-hydroxyacyl-CoA dehydratase 1	GO:0003824,GO:0008152	AT4G14440.1	ATECI3,ECI3,HCD1
Gorai.002G025700_D	9	15	26	Ribosomal protein L14	GO:0003735,GO:0006412,GO:0005622,GO:0005840	AT4G27090.1
Gorai.002G026100_D	5	1	0	Cyclopropane-fatty-acyl-phospholipid synthase	GO:0016491,GO:0055114,GO:0008610,GO:0008168,GO:0008276,GO:0006479,GO:0005737,GO:0008152	AT3G23510.1
Gorai.002G026300_A	33	9	47	Family of unknown function (DUF716)		AT5G13890.1
Gorai.002G026300_D	8	2	3	Family of unknown function (DUF716)		AT5G13890.1
Gorai.002G027300_D	2	1	2	Mitochondrial transcription termination factor family protein		AT3G46950.1
Gorai.002G027600_D	2	1	2	Mitochondrial transcription termination factor family protein		AT5G07900.1
Gorai.002G028300_D	5	17	2	rapid alkalinization factor 23		AT3G16570.1	ATRALF23,RALF23
Gorai.002G028400_D	14	7	13	Cysteine proteinases superfamily protein	GO:0008234,GO:0006508	AT4G15880.1	ATESD4,ESD4
Gorai.002G028700_A	9	2	1	TOXICOS EN LEVADURA 2		AT3G16720.1	ATL2,TL2
Gorai.002G029000_D	12	4	1	Mono-/di-acylglycerol lipase, N-terminal;Lipase, class 3	GO:0004806,GO:0006629,GO:0004091,GO:0016042	AT4G16070.1
Gorai.002G029200_A	5	4	46	response regulator 1	GO:0000156,GO:0000160,GO:0006355,GO:0003677	AT3G16857.2	ARR1,RR1
Gorai.002G029800_A	9	2	2	importin alpha isoform 1	GO:0005515,GO:0008565,GO:0006606,GO:0005634,GO:0005737,GO:0006886,GO:0005643	AT3G06720.1	AIMP ALPHA,AT-IMP,ATKAP ALPHA,IMPA-1,IMPA1
Gorai.002G029800_D	9	2	1	importin alpha isoform 1	GO:0005515,GO:0008565,GO:0006606,GO:0005634,GO:0005737,GO:0006886,GO:0005643	AT3G06720.1	AIMP ALPHA,AT-IMP,ATKAP ALPHA,IMPA-1,IMPA1
Gorai.002G030000_A	10	1	7	RNA polymerases M/15 Kd subunit	GO:0003676,GO:0008270,GO:0006351,GO:0003677,GO:0003899	AT3G16980.1	NRPB9A,NRPD9A,NRPE9A
Gorai.002G030000_D	25	1	7	RNA polymerases M/15 Kd subunit	GO:0003676,GO:0008270,GO:0006351,GO:0003677,GO:0003899	AT3G16980.1	NRPB9A,NRPD9A,NRPE9A
Gorai.002G031000_D	5	1	11			AT3G17120.1
Gorai.002G031100_D	5	1	9	Plant invertase/pectin methylesterase inhibitor superfamily protein	GO:0004857,GO:0030599	AT3G17130.1
Gorai.002G031300_D	1	2	1			AT1G47970.1
Gorai.002G031400_D	15	7	103	Pentatricopeptide repeat (PPR) superfamily protein		AT3G48810.1
Gorai.002G031600_D	5	1	8	agenet domain-containing protein	GO:0003723	AT3G06520.1
Gorai.002G032000_A	10	1	2	Nucleotide-sugar transporter family protein		AT3G17430.1
Gorai.002G032000_D	16	9	2	Nucleotide-sugar transporter family protein		AT3G17430.1
Gorai.002G032100_A	1	2	1	pyruvate dehydrogenase kinase	GO:0005524	AT3G06483.1	ATPDHK,PDK
Gorai.002G032800_D	9	2	20	Protein kinase superfamily protein	GO:0004672,GO:0005524,GO:0006468	AT1G16670.1
Gorai.002G033100_D	22	6	1	NAC domain containing protein 1	GO:0003677,GO:0006355	AT1G56010.2	anac021,ANAC022,NAC1
Gorai.002G033200_D	23	2	20			AT1G56020.1
Gorai.002G035500_D	1	7	1			AT1G79090.1
Gorai.002G035900_A	25	2	37	embryo defective 1303		AT1G56200.1	emb1303
Gorai.002G036000_D	1	2	1	SAUR-like auxin-responsive protein family		AT3G12955.1
Gorai.002G036300_A	7	7	41	Trypsin family protein		AT5G45030.1
Gorai.002G036300_D	12	7	41	Trypsin family protein		AT5G45030.1
Gorai.002G036600_A	11	10	2	Ribosomal protein S5/Elongation factor G/III/V family protein	GO:0003924,GO:0005525	AT1G56070.1	LOS1
Gorai.002G037600_D	15	7	26	ATP synthase delta-subunit gene	GO:0046933,GO:0015986,GO:0045261,GO:0005886	AT4G09650.1	ATPD
Gorai.002G038300_D	15	3	5	Signal transduction histidine kinase, hybrid-type, ethylene sensor	GO:0000156,GO:0000160,GO:0006355,GO:0000155,GO:0007165,GO:0016020,GO:0005515,GO:0005524	AT1G66340.1	AtETR1,EIN1,ETR,ETR1
Gorai.002G039500_D	25	1	24	Protein kinase superfamily protein	GO:0004672,GO:0005524,GO:0006468	AT1G67000.1
Gorai.002G039700_D	5	1	26	SOUL heme-binding family protein		AT1G17100.1
Gorai.002G039900_A	25	3	36	Protein kinase superfamily protein	GO:0004672,GO:0005524,GO:0006468	AT1G67000.1
Gorai.002G039900_D	25	12	101	Protein kinase superfamily protein	GO:0004672,GO:0005524,GO:0006468	AT1G67000.1
Gorai.002G040800_A	5	1	7
Gorai.002G043100_A	1	2	1	glyoxalase II 3	GO:0016787	AT1G53580.1	ETHE1,GLX2-3,GLY3
Gorai.002G043200_D	2	1	2	cytochrome P450, family 72, subfamily A, polypeptide 15	GO:0005506,GO:0009055,GO:0016705,GO:0020037,GO:0055114	AT3G14690.1	CYP72A15
Gorai.002G043400_D	1	2	4	cytochrome P450, family 72, subfamily A, polypeptide 15	GO:0005506,GO:0009055,GO:0016705,GO:0020037,GO:0055114	AT3G14690.1	CYP72A15
Gorai.002G044300_D	18	15	8	Carbohydrate-binding X8 domain superfamily protein		AT1G78520.1
Gorai.002G044900_D	14	12	17	NB-ARC domain-containing disease resistance protein	GO:0043531,GO:0006915,GO:0005524	AT4G27190.1
Gorai.002G045000_D	14	1	1	LRR and NB-ARC domains-containing disease resistance protein	GO:0043531,GO:0006915,GO:0005524	AT4G10780.1
Gorai.002G050300_A	16	9	2	SecY protein transport family protein	GO:0015450,GO:0015031,GO:0016020	AT2G34250.1
Gorai.002G050300_D	8	2	2	SecY protein transport family protein	GO:0015450,GO:0015031,GO:0016020	AT2G34250.1
Gorai.002G051200_D	2	1	26	gamma-glutamyl hydrolase 2	GO:0016787,GO:0006541,GO:0008242,GO:0003824	AT1G78680.1	ATGGH2,GGH2
Gorai.002G052200_A	4	36	2	Protein kinase superfamily protein	GO:0004672,GO:0005524,GO:0006468	AT5G38260.1
Gorai.002G052400_A	26	11	10	BES1/BZR1 homolog 4		AT1G78700.1	BEH4
Gorai.002G052600_A	20	13	9	receptor like protein 34	GO:0005515	AT3G11010.1	AtRLP34,RLP34
Gorai.002G053000_D	1	2	1	receptor like protein 40	GO:0005515	AT3G24982.1	ATRLP40,RLP40
Gorai.002G053100_A	20	6	9	sulphotransferase 12	GO:0008146	AT2G03760.1	AtSOT1,AtSOT12,ATST1,RAR047,SOT12,ST,ST1
Gorai.002G054300_A	8	9	21	tubby like protein 7		AT1G53320.1	AtTLP7,TLP7
Gorai.002G054400_A	9	2	10	multiprotein bridging factor 1A	GO:0043565	AT2G42680.1	ATMBF1A,MBF1A
Gorai.002G054400_D	9	2	4	multiprotein bridging factor 1A	GO:0043565	AT2G42680.1	ATMBF1A,MBF1A
Gorai.002G054500_D	10	1	11			AT1G78810.1
Gorai.002G055300_D	2	1	2	Nucleotide-sugar transporter family protein	GO:0016020	AT3G11320.1
Gorai.002G055500_D	2	1	9	Small nuclear ribonucleoprotein family protein		AT1G21190.1
Gorai.002G055800_D	20	6	9
Gorai.002G056200_A	1	2	3	Transmembrane amino acid transporter family protein		AT1G80510.1
Gorai.002G057200_A	1	2	1	lysophospholipase 2		AT1G52760.1	LysoPL2
Gorai.002G057800_A	5	1	2	pleiotropic drug resistance 12	GO:0005524,GO:0016887,GO:0016020	AT1G15520.1	ABCG40,ATABCG40,ATPDR12,PDR12
Gorai.002G057900_A	28	7	7	P-loop containing nucleoside triphosphate hydrolases superfamily protein	GO:0005524,GO:0009378,GO:0006281,GO:0006310	AT1G80350.1	AAA1,ATKTN1,BOT1,ERH3,FRA2,FRC2,FTR,KTN1,LUE1
Gorai.002G057900_D	10	1	8	P-loop containing nucleoside triphosphate hydrolases superfamily protein	GO:0005524,GO:0009378,GO:0006281,GO:0006310	AT1G80350.1	AAA1,ATKTN1,BOT1,ERH3,FRA2,FRC2,FTR,KTN1,LUE1
Gorai.002G058300_A	4	4	94	BRCT domain-containing DNA repair protein	GO:0005622	AT1G80420.1	ATXRCC1
Gorai.002G058500_A	2	1	2	CASC3/Barentsz eIF4AIII binding		AT1G80000.1
Gorai.002G059100_D	5	1	45	sulfate transporter 3;4	GO:0005215,GO:0006810,GO:0055085,GO:0016021	AT3G15990.1	SULTR3;4
Gorai.002G059200_D	9	2	20	structural molecules		AT1G79990.1
Gorai.002G059900_D	5	1	2	ATP binding microtubule motor family protein	GO:0003777,GO:0005524,GO:0007018	AT3G16060.1
Gorai.002G061400_A	2	1	2	phosphoenolpyruvate carboxylase 3	GO:0008964,GO:0006099,GO:0015977	AT3G14940.1	ATPPC3,PPC3
Gorai.002G061800_D	7	1	14	tetratricopetide-repeat thioredoxin-like 1	GO:0045454,GO:0005515	AT1G53300.1	TTL1
Gorai.002G062000_D	1	2	1	Galactosyltransferase family protein	GO:0008378,GO:0006486,GO:0016020	AT1G53290.1
Gorai.002G062100_A	6	2	1	Class I glutamine amidotransferase-like superfamily protein		AT1G53280.1
Gorai.002G063100_D	5	1	2
Gorai.002G064400_A	2	1	2	P-loop containing nucleoside triphosphate hydrolases superfamily protein	GO:0005524,GO:0006810,GO:0005622,GO:0016887	AT1G73170.1
Gorai.002G064400_D	2	1	9	P-loop containing nucleoside triphosphate hydrolases superfamily protein	GO:0005524,GO:0006810,GO:0005622,GO:0016887	AT1G73170.1
Gorai.002G064500_D	12	3	2	TEOSINTE BRANCHED 1, cycloidea and PCF transcription factor 3		AT1G53230.1	TCP3
Gorai.002G064600_A	1	2	1	IQ-domain 10		AT3G15050.1	IQD10
Gorai.002G064600_D	1	2	1	IQ-domain 10		AT3G15050.1	IQD10
Gorai.002G065100_A	28	10	9	RAB GTPase homolog A1F	GO:0003924,GO:0005525,GO:0007264,GO:0005634,GO:0005737,GO:0005622	AT5G60860.1	AtRABA1f,RABA1f
Gorai.002G065100_D	8	2	91	RAB GTPase homolog A1F	GO:0003924,GO:0005525,GO:0007264,GO:0005634,GO:0005737,GO:0005622	AT5G60860.1	AtRABA1f,RABA1f
Gorai.002G065600_D	7	8	1	RING/U-box superfamily protein		AT3G15070.1
Gorai.002G066100_D	4	1	2	GroES-like zinc-binding alcohol dehydrogenase family protein	GO:0008270,GO:0016491,GO:0055114	AT3G15090.1
Gorai.002G066700_A	1	2	1	2-oxoglutarate (2OG) and Fe(II)-dependent oxygenase superfamily protein	GO:0016491,GO:0016706,GO:0055114	AT4G16330.2
Gorai.002G066700_D	1	2	1	2-oxoglutarate (2OG) and Fe(II)-dependent oxygenase superfamily protein	GO:0016491,GO:0016706,GO:0055114	AT4G16330.2
Gorai.002G066800_D	10	1	8	P-loop containing nucleoside triphosphate hydrolases superfamily protein	GO:0005524	AT3G15120.1
Gorai.002G068700_A	14	3	5			AT5G53880.1
Gorai.002G069300_A	1	2	1	haloacid dehalogenase-like hydrolase family protein	GO:0046872	AT5G53850.2
Gorai.002G069300_D	3	4	1	haloacid dehalogenase-like hydrolase family protein	GO:0046872	AT5G53850.2
Gorai.002G070600_A	3	15	24	Protein of unknown function (DUF2921)		AT4G21700.1
Gorai.002G070600_D	3	15	17	Protein of unknown function (DUF2921)		AT4G21700.1
Gorai.002G070700_A	12	6	16	RING/U-box superfamily protein		AT1G53010.1
Gorai.002G071000_A	21	4	46	Nucleotidyltransferase family protein	GO:0016779	AT5G53770.1
Gorai.002G071500_A	31	5	11	RING membrane-anchor 3		AT4G27470.1	ATRMA3,RMA3
Gorai.002G071500_D	1	2	1	RING membrane-anchor 3		AT4G27470.1	ATRMA3,RMA3
Gorai.002G071700_A	10	1	58	Tetratricopeptide repeat (TPR)-like superfamily protein		AT4G21705.1
Gorai.002G071700_D	11	1	2	Tetratricopeptide repeat (TPR)-like superfamily protein		AT4G21705.1
Gorai.002G072200_D	2	1	2	Plasma-membrane choline transporter family protein		AT3G15380.1
Gorai.002G072300_D	2	1	2	silencing defective 5		AT3G15390.1	SDE5
Gorai.002G073300_A	1	2	1	Protein of unknown function (DUF1218)		AT4G27435.1
Gorai.002G073300_D	1	2	1	Protein of unknown function (DUF1218)		AT4G27435.1
Gorai.002G073400_A	1	2	1	COP1-interacting protein 7		AT4G27430.1	CIP7
Gorai.002G073400_D	1	2	1	COP1-interacting protein 7		AT4G27430.1	CIP7
Gorai.002G073700_A	22	2	3	NAC (No Apical Meristem) domain transcriptional regulator superfamily protein	GO:0003677,GO:0006355	AT4G27410.2	ANAC072,RD26
Gorai.002G074500_A	25	2	33			AT1G52855.1
Gorai.002G074700_D	2	1	2	protein kinase family protein	GO:0004672,GO:0005524,GO:0006468	AT5G54380.1	THE1
Gorai.002G075500_D	23	2	4
Gorai.002G076800_D	1	2	16	membrane-associated mannitol-induced	GO:0005198	AT5G54110.1	ATMAMI,MAMI
Gorai.002G077400_D	21	1	11	Met-10+ like family protein	GO:0003723,GO:0004809,GO:0008033,GO:0016740,GO:0008276,GO:0006479,GO:0005737	AT4G27340.1
Gorai.002G077700_D	2	1	7	B-box type zinc finger family protein	GO:0008270,GO:0005622	AT4G27310.1
Gorai.002G079100_A	5	17	2	Quinone reductase family protein	GO:0010181,GO:0016491,GO:0009055,GO:0050662	AT4G27270.1
Gorai.002G079200_A	3	4	1	basic helix-loop-helix (bHLH) DNA-binding superfamily protein		AT3G20640.1
Gorai.002G080500_A	13	15	104	terpene synthase 21	GO:0010333,GO:0016829,GO:0008152,GO:0000287	AT5G23960.2	ATTPS21,TPS21
Gorai.002G080600_A	1	6	4	GRAS family transcription factor		AT5G48150.1	PAT1
Gorai.002G081400_A	1	2	1	zinc finger protein-related		AT5G54630.1
Gorai.002G081400_D	1	2	41	zinc finger protein-related		AT5G54630.1
Gorai.002G081700_D	1	2	1	kinesin 3	GO:0003777,GO:0005524,GO:0007018	AT5G54670.1	ATK3,KATC
Gorai.002G081900_D	1	2	1	basic helix-loop-helix (bHLH) DNA-binding superfamily protein	GO:0030528,GO:0006355	AT5G54680.1	bHLH105,ILR3
Gorai.002G082000_D	1	23	10	Domain of unknown function (DUF1995)		AT3G20680.1
Gorai.002G082400_A	1	2	1	Ankyrin repeat family protein	GO:0005515	AT4G03460.1
Gorai.002G082600_A	2	1	11	Tetratricopeptide repeat (TPR)-like superfamily protein		AT4G04790.1
Gorai.002G082700_D	12	5	13	Late embryogenesis abundant (LEA) hydroxyproline-rich glycoprotein family		AT3G20600.1	NDR1
Gorai.002G083900_A	35	6	28	Ypt/Rab-GAP domain of gyp1p superfamily protein	GO:0005097,GO:0032313,GO:0005622	AT4G27100.1
Gorai.002G085200_A	1	2	1	glucose 6-phosphate/phosphate translocator 1	GO:0016020,GO:0055085	AT5G54800.1	ATGPT1,GPT1
Gorai.002G085400_A	25	1	95			AT1G50910.1
Gorai.002G085600_D	2	1	5	chloroplastic lipocalin	GO:0005488	AT3G47860.1	CHL
Gorai.002G086800_A	2	1	2	ARM repeat superfamily protein		AT4G27060.1	CN,SPR2,TOR1
Gorai.002G086800_D	2	1	2	ARM repeat superfamily protein		AT4G27060.1	CN,SPR2,TOR1
Gorai.002G086900_A	19	7	14	polymerase gamma 2	GO:0003677,GO:0003887,GO:0006260,GO:0003676,GO:0008408,GO:0006139,GO:0005622	AT1G50840.1	POLGAMMA2
Gorai.002G087500_D	5	5	26	Pollen Ole e 1 allergen and extensin family protein		AT5G54855.1
Gorai.002G087800_D	7	7	24			AT4G27020.1
Gorai.002G087900_A	10	1	2	cytochrome P450, family 716, subfamily A, polypeptide 1	GO:0005506,GO:0009055,GO:0016705,GO:0020037,GO:0055114	AT5G36110.1	CYP716A1
Gorai.002G088100_D	9	2	3	RNA-binding (RRM/RBD/RNP motifs) family protein	GO:0003676	AT4G27000.1	ATRBP45C
Gorai.002G088200_A	14	19	12	Phospholipid/glycerol acyltransferase family protein	GO:0016746,GO:0008152,GO:0008415	AT4G30580.1	ATS2,EMB1995,LPAT1
Gorai.002G088600_D	15	2	12	endoribonuclease L-PSP family protein		AT3G20390.1
Gorai.002G088700_A	8	9	3	RING/U-box superfamily protein		AT3G20395.1
Gorai.002G088700_D	16	5	2	RING/U-box superfamily protein		AT3G20395.1
Gorai.002G088800_D	1	6	4	calmodulin-domain protein kinase 9	GO:0004672,GO:0005524,GO:0006468	AT3G20410.1	CPK9
Gorai.002G088900_A	1	2	1	Translation initiation factor SUI1 family protein	GO:0003743,GO:0006413	AT5G54940.1
Gorai.002G089200_A	4	1	7	NADH:ubiquinone oxidoreductase, 17.2kDa subunit	GO:0008137,GO:0009055,GO:0016020	AT4G26965.1
Gorai.002G089200_D	2	1	63	NADH:ubiquinone oxidoreductase, 17.2kDa subunit	GO:0008137,GO:0009055,GO:0016020	AT4G26965.1
Gorai.002G089500_D	2	1	7	Protein of unknown function, DUF584		AT4G04630.1
Gorai.002G089600_A	22	2	1	geranylgeranyl reductase	GO:0008299	AT4G38460.1	GGR
Gorai.002G089600_D	13	6	2	geranylgeranyl reductase	GO:0008299	AT4G38460.1	GGR
Gorai.002G090200_A	1	2	1	GDSL-like Lipase/Acylhydrolase superfamily protein	GO:0016788,GO:0006629	AT5G55050.1
Gorai.002G090200_D	22	6	1	GDSL-like Lipase/Acylhydrolase superfamily protein	GO:0016788,GO:0006629	AT5G55050.1
Gorai.002G090500_D	2	1	2
Gorai.002G091100_D	1	2	62	Saposin-like aspartyl protease family protein	GO:0004190,GO:0006508,GO:0006629	AT1G62290.1
Gorai.002G091400_A	2	1	2			AT1G50730.1
Gorai.002G091400_D	19	1	2			AT1G50730.1
Gorai.002G092300_D	15	5	6
Gorai.002G092600_A	28	2	4	O-Glycosyl hydrolases family 17 protein	GO:0004553,GO:0005975	AT5G55180.1
Gorai.002G092600_D	1	2	3	O-Glycosyl hydrolases family 17 protein	GO:0004553,GO:0005975	AT5G55180.1
Gorai.002G092900_D	1	2	1	ethylene responsive element binding factor 3	GO:0003700,GO:0006355	AT1G50640.1	ATERF3,ERF3
Gorai.002G093000_A	2	1	2	Protein of unknown function (DUF3537)		AT3G20300.1
Gorai.002G093000_D	2	1	2	Protein of unknown function (DUF3537)		AT3G20300.1
Gorai.002G093300_A	23	2	24	GDSL-like Lipase/Acylhydrolase superfamily protein	GO:0016788,GO:0006629	AT4G26790.1
Gorai.002G093400_A	5	1	2	Co-chaperone GrpE family protein	GO:0000774,GO:0042803,GO:0051087,GO:0006457	AT4G26780.1	AR192
Gorai.002G093400_D	7	1	10	Co-chaperone GrpE family protein	GO:0000774,GO:0042803,GO:0051087,GO:0006457	AT4G26780.1	AR192
Gorai.002G093500_A	10	7	9			AT5G55210.1
Gorai.002G093500_D	2	1	6			AT5G55210.1
Gorai.002G093600_D	15	7	27	trigger factor type chaperone family protein	GO:0006457,GO:0015031	AT5G55220.1
Gorai.002G093700_D	9	2	10	cytidinediphosphate diacylglycerol synthase 2	GO:0016772,GO:0016020	AT4G22340.3	CDS2
Gorai.002G093800_D	1	2	16	microtubule-associated proteins 65-1		AT5G55230.1	ATMAP65-1,MAP65-1
Gorai.002G094200_D	8	2	4	homolog of bacterial cytokinesis Z-ring protein FTSZ 1-1	GO:0051258,GO:0043234	AT5G55280.1	ATFTSZ1-1,CPFTSZ,FTSZ1-1
Gorai.002G094300_D	9	2	3	syntaxin of plants 51	GO:0005515	AT1G16240.1	ATSYP51,SYP51
Gorai.002G094600_A	6	2	1	fimbrin 1	GO:0005515	AT4G26700.1	ATFIM1,FIM1
Gorai.002G094900_A	10	1	11	SHV3-like 1	GO:0008889,GO:0006071	AT5G55480.1	SVL1
Gorai.002G095000_D	12	12	13
Gorai.002G095100_D	1	2	1	RmlC-like cupins superfamily protein		AT1G50590.1
Gorai.002G095600_D	16	9	2	Mitochondrial import inner membrane translocase subunit Tim17/Tim22/Tim23 family protein	GO:0015031,GO:0008565,GO:0005743	AT4G26670.1
Gorai.002G095800_A	2	1	5	tornado 1		AT5G55540.1	LOP1,TRN1
Gorai.002G096100_A	14	3	5	Protein kinase superfamily protein	GO:0004672,GO:0005524,GO:0006468	AT5G55560.1
Gorai.002G096100_D	14	3	5	Protein kinase superfamily protein	GO:0004672,GO:0005524,GO:0006468	AT5G55560.1
Gorai.002G096500_A	1	2	72			AT5G55570.1
Gorai.002G097200_D	6	2	1
Gorai.002G097500_D	34	2	43	cytochrome P450, family 71, subfamily B, polypeptide 34	GO:0005506,GO:0009055,GO:0016705,GO:0020037,GO:0055114	AT3G26300.1	CYP71B34
Gorai.002G098400_A	1	2	1	serine acetyltransferase 2;2	GO:0009001,GO:0006535,GO:0005737	AT3G13110.1	ATSERAT2;2,SAT-1,SAT-A,SAT-M,SAT3,SERAT2;2
Gorai.002G099000_D	19	7	2	Haloacid dehalogenase-like hydrolase (HAD) superfamily protein	GO:0005515	AT1G55900.1	emb1860,TIM50
Gorai.002G099400_D	17	3	14	Outward rectifying potassium channel protein		AT5G55630.1	ATKCO1,ATTPK1,KCO1,TPK1
Gorai.002G099700_D	12	6	1	DEK domain-containing chromatin associated protein		AT4G26630.1
Gorai.002G099800_D	12	6	1
Gorai.002G100100_A	11	1	2	FASCICLIN-like arabinogalactan 1		AT5G55730.1	FLA1
Gorai.002G100100_D	1	3	1	FASCICLIN-like arabinogalactan 1		AT5G55730.1	FLA1
Gorai.002G100800_A	2	1	61	NOL1/NOP2/sun family protein / antitermination NusB domain-containing protein	GO:0003723,GO:0006355,GO:0016740	AT3G13180.1
Gorai.002G100900_A	7	7	42	ubiquitin-protein ligase 1	GO:0005515,GO:0016881,GO:0006464,GO:0005622	AT1G55860.2	UPL1
Gorai.002G101000_A	12	2	29	Pentatricopeptide repeat (PPR) superfamily protein		AT5G55840.1
Gorai.002G102100_D	2	1	2	RNA polymerase I subunit 43	GO:0003899,GO:0046983,GO:0006351	AT1G60620.1	ATRPAC43,RPAC43
Gorai.002G102200_A	2	1	2	S-adenosyl-L-methionine-dependent methyltransferases superfamily protein	GO:0003676,GO:0008168,GO:0032259	AT4G26600.1
Gorai.002G102200_D	2	1	2	S-adenosyl-L-methionine-dependent methyltransferases superfamily protein	GO:0003676,GO:0008168,GO:0032259	AT4G26600.1
Gorai.002G102500_A	2	1	2			AT5G55960.1
Gorai.002G102600_A	1	2	1	RING/U-box superfamily protein		AT5G55970.1
Gorai.002G102900_A	2	1	2	calcineurin B-like 3		AT4G26570.1	ATCBL3,CBL3
Gorai.002G102900_D	16	5	2	calcineurin B-like 3		AT4G26570.1	ATCBL3,CBL3
Gorai.002G103200_D	11	1	2	Got1/Sft2-like vescicle transport protein family	GO:0016192,GO:0016021,GO:0006810	AT4G26550.1
Gorai.002G103600_A	7	8	40	uridine kinase-like 3	GO:0005524,GO:0016301,GO:0008152	AT1G55810.1	UKL3
Gorai.002G103900_A	5	1	2	cation exchanger 5	GO:0055085,GO:0016021	AT1G55730.1	ATCAX5,CAX5
Gorai.002G104400_D	1	2	1	receptor-like protein kinase 1	GO:0004672,GO:0005524,GO:0006468,GO:0005529	AT5G60900.1	RLK1
Gorai.002G105400_A	12	6	34	Pyridoxal phosphate (PLP)-dependent transferases superfamily protein		AT5G51920.1
Gorai.002G105700_D	2	1	2	Ubiquitin carboxyl-terminal hydrolase family protein		AT5G45790.2
Gorai.002G105900_D	2	4	2	Alkaline-phosphatase-like family protein	GO:0003824	AT5G17250.1
Gorai.002G106300_D	30	2	0	myb domain protein 63	GO:0003677	AT1G79180.1	ATMYB63,MYB63
Gorai.002G106800_A	4	8	7	EXS (ERD1/XPR1/SYG1) family protein	GO:0016021	AT1G14040.1
Gorai.002G106900_A	7	12	1			AT5G08450.1
Gorai.002G107100_D	31	6	5	receptor-like protein kinase 1	GO:0004672,GO:0005524,GO:0006468,GO:0048544,GO:0005529	AT5G60900.1	RLK1
Gorai.002G107300_D	11	1	2	phosphoglycerate kinase 1	GO:0004618,GO:0006096	AT3G12780.1	PGK1
Gorai.002G109200_D	2	1	2			AT5G51510.1
Gorai.002G109600_A	5	1	6	FKBP-like peptidyl-prolyl cis-trans isomerase family protein	GO:0006457	AT3G12340.1
Gorai.002G109700_A	26	18	1			AT1G16290.1
Gorai.002G110000_D	2	1	2	Protein kinase superfamily protein with octicosapeptide/Phox/Bem1p domain	GO:0004672,GO:0005524,GO:0006468,GO:0005515	AT1G16270.1
Gorai.002G110500_D	21	1	5	aldehyde dehydrogenase 5F1	GO:0016491,GO:0008152,GO:0055114	AT1G79440.1	ALDH5F1,SSADH,SSADH1
Gorai.002G110900_D	19	7	88	nuclear pore anchor	GO:0006606,GO:0005643	AT1G79280.1	AtTPR,NUA
Gorai.002G111100_D	2	1	2	DNA glycosylase superfamily protein	GO:0008725,GO:0006284	AT3G12710.1
Gorai.002G111400_D	13	6	2	RNA-binding (RRM/RBD/RNP motifs) family protein	GO:0003676	AT1G66260.1
Gorai.002G112000_D	1	2	1	Protein of unknown function, DUF617		AT1G21050.1
Gorai.002G112400_A	10	1	6	ARID/BRIGHT DNA-binding domain-containing protein	GO:0003677,GO:0005622	AT1G76510.1
Gorai.002G112700_A	2	1	2	AT hook motif DNA-binding family protein		AT2G33620.1
Gorai.002G112800_A	2	1	32	NAD(P)-binding Rossmann-fold superfamily protein	GO:0016491,GO:0008152,GO:0003854,GO:0016616,GO:0006694,GO:0055114,GO:0003824,GO:0050662,GO:0044237,GO:0009058,GO:0008831,GO:0045226	AT2G33630.1
Gorai.002G113200_D	7	1	1	HSP20-like chaperones superfamily protein		AT1G20870.1
Gorai.002G113400_A	2	1	2	tonoplast monosaccharide transporter2	GO:0022857,GO:0055085,GO:0016021	AT4G35300.1	TMT2
Gorai.002G113400_D	2	1	2	tonoplast monosaccharide transporter2	GO:0022857,GO:0055085,GO:0016021	AT4G35300.1	TMT2
Gorai.002G113600_A	35	1	28	Ribophorin I	GO:0004579,GO:0006486,GO:0005783,GO:0016021	AT1G76400.1
Gorai.002G113600_D	2	1	2	Ribophorin I	GO:0004579,GO:0006486,GO:0005783,GO:0016021	AT1G76400.1
Gorai.002G114300_A	1	2	4	Protein phosphatase 2C family protein	GO:0003824	AT2G33700.1
Gorai.002G114500_D	1	7	10	Galactose oxidase/kelch repeat superfamily protein	GO:0005515	AT5G42350.1
Gorai.002G114600_D	1	2	19	ARM repeat superfamily protein	GO:0005515,GO:0004842,GO:0016567,GO:0000151,GO:0044183	AT1G76390.1
Gorai.002G114900_A	5	1	54
Gorai.002G115700_A	2	4	2	Patched family protein	GO:0008158,GO:0016020	AT4G38350.1
Gorai.002G115900_A	1	2	19	catalase 2	GO:0004096,GO:0020037,GO:0055114,GO:0006979,GO:0005506	AT4G35090.1	CAT2
Gorai.002G116000_A	2	1	2	3\'-5\'-exoribonuclease family protein	GO:0003723,GO:0006396	AT1G60080.1
Gorai.002G116800_D	2	1	2	Small nuclear ribonucleoprotein family protein		AT1G20580.1
Gorai.002G116900_A	2	1	2	Nucleotide-diphospho-sugar transferases superfamily protein		AT1G20575.1
Gorai.002G118000_A	2	1	2	Tetratricopeptide repeat (TPR)-like superfamily protein		AT1G76280.3
Gorai.002G118200_D	2	1	2	O-fucosyltransferase family protein		AT1G76270.1
Gorai.002G118600_D	5	1	5	transcription activator-related		AT5G42290.1
Gorai.002G118800_D	1	2	1	FtsH extracellular protease family	GO:0005524,GO:0004222,GO:0006508	AT5G42270.1	FTSH5,VAR1
Gorai.002G119000_A	2	32	2	Arabidopsis protein of unknown function (DUF241)		AT2G17080.1
Gorai.002G119900_D	2	7	2	Spc97 / Spc98 family of spindle pole body (SBP) component	GO:0000226,GO:0000922,GO:0005815	AT5G17410.2
Gorai.002G120100_D	12	28	27	Prolyl oligopeptidase family protein	GO:0008236,GO:0006508,GO:0004252	AT1G76140.1
Gorai.002G120900_D	1	2	3	Major facilitator superfamily protein	GO:0055085,GO:0016021	AT2G16990.1
Gorai.002G121100_D	2	1	2	ATPase, V1 complex, subunit B protein	GO:0005524,GO:0016820,GO:0015991,GO:0033178,GO:0046933,GO:0046961,GO:0015992,GO:0046034,GO:0016469	AT4G38510.5
Gorai.002G121200_D	1	6	1	DC1 domain-containing protein	GO:0016209,GO:0016491,GO:0055114	AT1G60420.1
Gorai.002G121400_A	9	6	93	LETM1-like protein		AT1G65540.1
Gorai.002G121400_D	14	27	24	LETM1-like protein		AT1G65540.1
Gorai.002G121500_A	11	9	2	GTP binding Elongation factor Tu family protein	GO:0003924,GO:0005525	AT1G07930.1
Gorai.002G121500_D	16	9	2	GTP binding Elongation factor Tu family protein	GO:0003924,GO:0005525	AT1G07930.1
Gorai.002G122500_D	3	4	13	Protein kinase superfamily protein	GO:0004672,GO:0005524,GO:0006468	AT4G35030.3
Gorai.002G122800_D	5	1	6	Chaperone protein htpG family protein	GO:0005524,GO:0051082,GO:0006457,GO:0006950	AT4G24190.1	AtHsp90-7,AtHsp90.7,HSP90.7,SHD
Gorai.002G123400_D	1	2	10	tubulin beta-1 chain	GO:0051258,GO:0043234,GO:0003924,GO:0005525,GO:0006184,GO:0007017,GO:0005874	AT1G75780.1	TUB1
Gorai.002G123700_D	20	6	28	glycosyl hydrolase 9B5	GO:0004553,GO:0005975	AT1G19940.1	AtGH9B5,GH9B5
Gorai.002G124500_D	2	1	2	S-adenosyl-L-methionine-dependent methyltransferases superfamily protein	GO:0008168	AT3G27230.1
Gorai.002G125600_A	1	2	29	SHI-related sequence 5		AT1G75520.1	SRS5
Gorai.002G125800_D	22	6	1	Transcription initiation factor IIF, beta subunit	GO:0005524,GO:0006367,GO:0005674,GO:0003702	AT1G75510.1
Gorai.002G126000_A	14	3	5	LisH and RanBPM domains containing protein		AT1G06060.1
Gorai.002G126400_A	15	4	12	ubiquitin-conjugating enzyme 18	GO:0016881	AT5G42990.1	UBC18
Gorai.002G127000_D	1	2	1	NmrA-like negative transcriptional regulator family protein	GO:0003854,GO:0016616,GO:0006694,GO:0055114,GO:0003824,GO:0050662,GO:0044237	AT1G75280.1
Gorai.002G127700_D	10	1	99	Leucine-rich repeat protein kinase family protein	GO:0004672,GO:0005524,GO:0006468,GO:0005515	AT2G16250.1
Gorai.002G127900_A	8	9	27			AT5G42765.1
Gorai.002G127900_D	15	9	12			AT5G42765.1
Gorai.002G128400_A	1	2	3	Sugar isomerase (SIS) family protein	GO:0004347,GO:0006094,GO:0006096	AT5G42740.1
Gorai.002G128400_D	1	2	9	Sugar isomerase (SIS) family protein	GO:0004347,GO:0006094,GO:0006096	AT5G42740.1
Gorai.002G128500_A	7	11	1	GYF domain-containing protein	GO:0005515	AT5G42950.1
Gorai.002G128600_A	7	8	1	GYF domain-containing protein	GO:0005515	AT5G42950.1
Gorai.002G129000_A	1	2	3	Protein of unknown function (DUF3317)		AT1G06515.1
Gorai.002G129700_D	1	2	1	RING/U-box superfamily protein		AT1G19310.1
Gorai.002G130000_A	13	5	2	MATE efflux family protein	GO:0015238,GO:0015297,GO:0006855,GO:0055085,GO:0016020	AT1G47530.1
Gorai.002G130600_A	8	1	32			AT1G47310.1
Gorai.002G132300_D	1	2	1	alpha-amylase-like	GO:0003824,GO:0043169,GO:0005975,GO:0004556,GO:0005509	AT4G25000.1	AMY1,ATAMY1
Gorai.002G132400_A	25	2	36	sterol carrier protein 2	GO:0032934	AT5G42890.1	ATSCP2,SCP2
Gorai.002G132400_D	1	2	1	sterol carrier protein 2	GO:0032934	AT5G42890.1	ATSCP2,SCP2
Gorai.002G132800_A	1	2	1	Protein of unknown function (DUF620)		AT3G19540.1
Gorai.002G132900_A	1	2	1	Eukaryotic aspartyl protease family protein	GO:0004190,GO:0006508	AT5G43100.1
Gorai.002G132900_D	9	2	1	Eukaryotic aspartyl protease family protein	GO:0004190,GO:0006508	AT5G43100.1
Gorai.002G133200_A	9	15	93	WPP domain protein 1		AT5G43070.1	WPP1
Gorai.002G133800_A	9	2	57	Granulin repeat cysteine protease family protein	GO:0008234,GO:0006508	AT1G47128.1	RD21,RD21A
Gorai.002G133800_D	9	2	4	Granulin repeat cysteine protease family protein	GO:0008234,GO:0006508	AT1G47128.1	RD21,RD21A
Gorai.002G134500_D	1	2	1	P-loop containing nucleoside triphosphate hydrolases superfamily protein	GO:0003777,GO:0005524,GO:0007018	AT5G47820.1	FRA1
Gorai.002G135500_D	2	1	2	Ubiquitin system component Cue protein	GO:0005515	AT1G27752.1
Gorai.002G135600_A	5	1	2			AT5G63905.1
Gorai.002G135900_D	6	2	17	basic leucine-zipper 5	GO:0003700,GO:0043565,GO:0046983,GO:0006355	AT3G49760.1	AtbZIP5,bZIP5
Gorai.002G136000_D	20	2	9
Gorai.002G137400_A	1	2	3	amino acid permease 6		AT5G49630.1	AAP6
Gorai.002G138400_D	2	1	2	Ribosomal protein L2 family	GO:0003735,GO:0006412,GO:0005622,GO:0005840	AT4G36130.1
Gorai.002G138600_A	2	1	2	glycine-rich RNA-binding protein 4	GO:0003676	AT3G23830.1	GR-RBP4,GRP4
Gorai.002G138900_A	20	8	16	P450 reductase 1	GO:0016491,GO:0055114,GO:0010181	AT4G24520.1	AR1,ATR1
Gorai.002G138900_D	3	4	1	P450 reductase 1	GO:0016491,GO:0055114,GO:0010181	AT4G24520.1	AR1,ATR1
Gorai.002G139000_D	7	2	1	Homeodomain-like superfamily protein	GO:0003677	AT1G09710.1
Gorai.002G139200_D	1	2	3			AT4G38060.2
Gorai.002G139300_D	2	1	2	L-Aspartase-like family protein	GO:0042450,GO:0004056	AT5G10920.1
Gorai.002G140600_A	1	2	4	APR-like 4	GO:0045454	AT1G34780.1	APRL4,ATAPRL4
Gorai.002G140600_D	1	2	1	APR-like 4	GO:0045454	AT1G34780.1	APRL4,ATAPRL4
Gorai.002G140900_D	24	2	9	transferases, transferring glycosyl groups	GO:0005515	AT1G78280.1
Gorai.002G141000_A	5	12	11	general regulatory factor 2	GO:0019904	AT1G78300.1	14-3-3OMEGA,GF14 OMEGA,GRF2
Gorai.002G141000_D	2	1	2	general regulatory factor 2	GO:0019904	AT1G78300.1	14-3-3OMEGA,GF14 OMEGA,GRF2
Gorai.002G141200_A	2	1	2		GO:0008479,GO:0006400,GO:0008616
Gorai.002G141200_D	12	6	37		GO:0008479,GO:0006400,GO:0008616
Gorai.002G142100_A	7	7	1	Chaperone DnaJ-domain superfamily protein	GO:0031072	AT2G01710.1
Gorai.002G143500_A	2	1	2			AT5G51960.1
Gorai.002G143500_D	2	1	2			AT5G51960.1
Gorai.002G143900_D	7	11	1	RING/U-box superfamily protein		AT5G04460.1
Gorai.002G144400_D	5	3	5			AT5G02420.1
Gorai.002G144500_D	2	1	2	DNA binding		AT3G52170.1
Gorai.002G145100_A	4	1	2	HhH-GPD base excision DNA repair family protein	GO:0006284	AT5G04560.2	DME
Gorai.002G145800_D	23	2	101	UDP-Glycosyltransferase superfamily protein	GO:0016758,GO:0008152,GO:0030246,GO:0005975,GO:0030259	AT5G65550.1
Gorai.002G146200_A	21	1	55	Nucleotide-sugar transporter family protein	GO:0055085	AT3G10290.1
Gorai.002G147000_D	3	2	25			AT3G57400.1
Gorai.002G147200_D	1	2	1	DEA(D/H)-box RNA helicase family protein		AT1G31970.1	STRS1
Gorai.002G147900_A	6	2	4			AT1G65090.3
Gorai.002G148100_D	3	4	1	sister chromatid cohesion 1 protein 4	GO:0000228,GO:0005515	AT5G16270.1	ATRAD21.3,SYN4
Gorai.002G148300_A	1	2	1	PAR1 protein		AT3G54040.1
Gorai.002G148300_D	1	2	1	PAR1 protein		AT3G54040.1
Gorai.002G148900_A	1	2	1	ATP binding microtubule motor family protein	GO:0003777,GO:0005524,GO:0007018	AT2G21300.1
Gorai.002G148900_D	1	2	4	ATP binding microtubule motor family protein	GO:0003777,GO:0005524,GO:0007018	AT2G21300.1
Gorai.002G149400_D	9	2	19	ATPase, F0/V0 complex, subunit C protein	GO:0015078,GO:0015991,GO:0033177	AT1G19910.1	ATVHA-C2,AVA-2PE,AVA-P2
Gorai.002G150000_D	2	1	7	ribosomal RNA processing 4		AT1G03360.1	ATRRP4,RRP4
Gorai.002G150300_A	9	2	10	cellulose synthase 6	GO:0016760,GO:0030244,GO:0016020	AT5G64740.1	CESA6,E112,IXR2,PRC1
Gorai.002G150400_D	15	12	12	ATPase, F1 complex, delta/epsilon subunit		AT5G47030.1
Gorai.002G151000_A	24	1	9	Chaperone DnaJ-domain superfamily protein	GO:0031072	AT2G18465.1
Gorai.002G151600_D	2	4	22	SIN-like family protein	GO:0003899,GO:0006351,GO:0005634	AT5G49530.1
Gorai.002G152700_A	1	2	4
Gorai.002G152700_D	1	2	1
Gorai.002G152800_A	1	2	1
Gorai.002G152800_D	1	2	1
Gorai.002G152900_A	1	2	10
Gorai.002G153000_A	1	2	4
Gorai.002G153100_D	1	2	3
Gorai.002G153500_A	4	4	7			AT5G06440.2
Gorai.002G153800_A	12	4	1	carotenoid isomerase	GO:0009055,GO:0016491,GO:0055114	AT1G06820.1	CCR2,CRTISO
Gorai.002G153800_D	7	8	1	carotenoid isomerase	GO:0009055,GO:0016491,GO:0055114	AT1G06820.1	CCR2,CRTISO
Gorai.002G153900_A	12	4	105	ABC-2 type transporter family protein	GO:0005524,GO:0016887,GO:0016020	AT5G06530.1
Gorai.002G154100_A	12	3	3	Protein of unknown function, DUF593		AT5G06560.1
Gorai.002G154300_D	2	5	2	ribosomal protein 5B	GO:0006412,GO:0005840,GO:0005622,GO:0003735,GO:0015935	AT2G37270.1	ATRPS5B,RPS5B
Gorai.002G154500_A	5	1	12	R-protein L3 B	GO:0003735,GO:0006412,GO:0005622,GO:0005840	AT1G61580.1	ARP2,RPL3B
Gorai.002G155500_D	1	18	1			AT3G58050.1
Gorai.002G155600_D	15	1	12	seven in absentia of Arabidopsis 2	GO:0006511,GO:0007275,GO:0005634	AT3G58040.1	SINAT2
Gorai.002G155800_A	1	2	9	homeobox from Arabidopsis thaliana	GO:0003700,GO:0043565,GO:0006355,GO:0003677,GO:0005634,GO:0006351,GO:0016563	AT5G06710.1	HAT14
Gorai.002G155800_D	3	27	1	homeobox from Arabidopsis thaliana	GO:0003700,GO:0043565,GO:0006355,GO:0003677,GO:0005634,GO:0006351,GO:0016563	AT5G06710.1	HAT14
Gorai.002G156900_A	15	10	12	Ribosomal protein L6 family protein	GO:0003735,GO:0006412,GO:0005622,GO:0005840	AT1G74050.1
Gorai.002G157000_D	8	2	3	RAB GTPase homolog A4D	GO:0005525,GO:0007264,GO:0005622	AT3G12160.1	ATRABA4D,RABA4D
Gorai.002G157300_A	2	1	2	ovate family protein 6		AT3G52525.1	ATOFP6,OFP6
Gorai.002G157600_D	28	2	4			AT5G06270.1
Gorai.002G158400_D	11	1	2	Iron-sulphur cluster biosynthesis family protein		AT5G03905.1
Gorai.002G158800_D	8	9	3	Integral membrane Yip1 family protein	GO:0016020	AT3G52760.1
Gorai.002G159600_D	1	6	1	Duplicated homeodomain-like superfamily protein		AT5G03680.1	PTL
Gorai.002G159900_A	19	7	2	Protein kinase superfamily protein	GO:0004672,GO:0005524,GO:0006468	AT5G03730.1	AtCTR1,CTR1,SIS1
Gorai.002G161600_D	1	13	1	Protein of unknown function (DUF1624)		AT5G27730.1
Gorai.002G161800_D	9	6	3			AT2G36895.1
Gorai.002G162100_A	12	11	9	ATPase, AAA-type, CDC48 protein	GO:0005524,GO:0009378,GO:0006281,GO:0006310,GO:0016887	AT5G03340.1
Gorai.002G162400_A	1	2	19			AT2G37035.1
Gorai.002G162400_D	8	2	27			AT2G37035.1
Gorai.002G163200_A	1	2	1	Protein of unknown function (DUF579)		AT1G09610.1
Gorai.002G163200_D	1	2	1	Protein of unknown function (DUF579)		AT1G09610.1
Gorai.002G163300_A	4	4	7	ATP synthase alpha/beta family protein	GO:0005524,GO:0016820,GO:0015991,GO:0033178,GO:0046933,GO:0046961,GO:0015992,GO:0046034,GO:0016469,GO:0045261,GO:0015986,GO:0008553	AT5G08680.1
Gorai.002G163500_A	2	1	2			AT5G13260.1
Gorai.002G163500_D	2	1	2			AT5G13260.1
Gorai.002G163600_D	12	3	75	protein kinase family protein / C-type lectin domain-containing protein	GO:0005488,GO:0004672,GO:0005524,GO:0006468	AT1G52310.1
Gorai.002G164900_D	1	2	3	UDP-glucosyl transferase 74B1	GO:0016758,GO:0008152	AT1G24100.1	UGT74B1
Gorai.002G166500_D	1	2	3	ARM repeat superfamily protein		AT5G15680.1
Gorai.002G167000_A	4	4	58	TBP-associated factor 15	GO:0003676,GO:0008270,GO:0005622	AT1G50300.1	TAF15
Gorai.002G167300_D	1	2	1	RING/U-box superfamily protein		AT3G19895.1
Gorai.002G167400_A	6	2	34			AT3G19900.1
Gorai.002G167500_D	1	2	1	Remorin family protein		AT2G02170.1
Gorai.002G169800_A	1	2	1	peptide transporter 2	GO:0005215,GO:0006857,GO:0016020	AT2G02040.1	ATPTR2,ATPTR2-B,NTR1,PTR2,PTR2-B
Gorai.002G170500_A	1	2	53	Endomembrane protein 70 protein family	GO:0016021	AT2G01970.1
Gorai.002G170500_D	8	9	47	Endomembrane protein 70 protein family	GO:0016021	AT2G01970.1
Gorai.002G170600_D	22	2	1	NAD(P)-linked oxidoreductase superfamily protein	GO:0055114,GO:0016491	AT1G59960.1
Gorai.002G171400_D	15	7	12	Protein kinase superfamily protein	GO:0004672,GO:0005524,GO:0006468	AT3G09010.1
Gorai.002G171800_A	2	1	2	microtubule-associated proteins 70-2		AT1G24764.1	ATMAP70-2,MAP70-2
Gorai.002G171800_D	2	1	2	microtubule-associated proteins 70-2		AT1G24764.1	ATMAP70-2,MAP70-2
Gorai.002G172200_D	5	26	2	Zinc finger, C3HC4 type (RING finger) family protein		AT1G68070.1
Gorai.002G172300_A	9	2	4	ARM repeat superfamily protein	GO:0005515	AT2G01690.1
Gorai.002G173200_D	1	2	1	Caleosin-related family protein		AT1G70670.1
Gorai.002G173400_D	11	14	27	plant UBX domain-containing protein 2	GO:0005515	AT2G01650.1	PUX2
Gorai.002G173700_A	13	6	2	jasmonate-zim-domain protein 3	GO:0005515	AT3G17860.1	JAI3,JAZ3,TIFY6B
Gorai.002G173700_D	13	17	2	jasmonate-zim-domain protein 3	GO:0005515	AT3G17860.1	JAI3,JAZ3,TIFY6B
Gorai.002G174100_D	12	3	8	O-Glycosyl hydrolases family 17 protein	GO:0004553,GO:0005975	AT2G01630.1
Gorai.002G174600_A	12	6	18	PLANT CADMIUM RESISTANCE 2		AT1G14870.1	PCR2
Gorai.002G174700_D	46	1	14	PLANT CADMIUM RESISTANCE 2		AT1G14870.1	PCR2
Gorai.002G176600_D	9	10	1	chlororespiratory reduction 3		AT2G01590.1	CRR3
Gorai.002G177000_A	1	2	10	GRAS family transcription factor family protein		AT2G01570.1	RGA,RGA1
Gorai.002G177100_A	1	2	1			AT1G70780.1
Gorai.002G177100_D	1	2	1			AT1G70780.1
Gorai.002G177200_A	1	2	1	conserved peptide upstream open reading frame 28		AT1G70782.1	CPuORF28
Gorai.002G177200_D	1	2	1	conserved peptide upstream open reading frame 28		AT1G70782.1	CPuORF28
Gorai.002G178200_A	2	1	2	O-fucosyltransferase family protein		AT2G01480.1
Gorai.002G178500_A	5	1	11			AT1G23110.1
Gorai.002G178500_D	2	1	2			AT1G23110.1
Gorai.002G178600_A	2	1	2	sulfate transporter 91	GO:0005215,GO:0006810,GO:0055085,GO:0016021	AT1G23090.1	AST91,SULTR3;3
Gorai.002G178600_D	2	1	2	sulfate transporter 91	GO:0005215,GO:0006810,GO:0055085,GO:0016021	AT1G23090.1	AST91,SULTR3;3
Gorai.002G178700_D	2	7	11	MAP kinase 17	GO:0004672,GO:0005524,GO:0006468	AT2G01450.1	ATMPK17,MPK17
Gorai.002G179700_A	8	9	3	NHL domain-containing protein		AT2G01410.1
Gorai.002G179700_D	10	1	51	NHL domain-containing protein		AT2G01410.1
Gorai.002G179900_D	12	45	1	quinolinate phoshoribosyltransferase	GO:0004514,GO:0009435,GO:0016763	AT2G01350.1	QPT
Gorai.002G180200_D	2	5	2	ARM repeat superfamily protein	GO:0005515,GO:0004842,GO:0016567,GO:0000151	AT1G23030.1
Gorai.002G180300_A	2	1	2	myb domain protein 4	GO:0003677	AT4G38620.1	ATMYB4,MYB4
Gorai.002G180700_A	11	1	2	ABC-2 type transporter family protein	GO:0005524,GO:0016887,GO:0016020	AT2G01320.2
Gorai.002G181100_A	3	39	17	ribose-5-phosphate isomerase 2	GO:0004751,GO:0009052	AT2G01290.1	RPI2
Gorai.002G181200_D	3	3	1	RING/FYVE/PHD zinc finger superfamily protein		AT2G01275.1
Gorai.002G181300_A	1	2	1	dihydrosphingosine phosphate lyase	GO:0008152,GO:0016831,GO:0030170,GO:0019752	AT1G27980.1	ATDPL1,DPL1
Gorai.002G181600_A	22	6	24	WRKY DNA-binding protein 75	GO:0003700,GO:0043565,GO:0006355	AT5G13080.1	ATWRKY75,WRKY75
Gorai.002G181600_D	22	3	1	WRKY DNA-binding protein 75	GO:0003700,GO:0043565,GO:0006355	AT5G13080.1	ATWRKY75,WRKY75
Gorai.002G181700_D	5	1	12	Squamosa promoter-binding protein-like (SBP domain) transcription factor family protein	GO:0003677,GO:0005634	AT5G50670.1
Gorai.002G181900_A	5	1	6			AT1G27290.1
Gorai.002G182200_A	5	1	2	histidine kinase 3	GO:0000156,GO:0000160,GO:0006355,GO:0000155,GO:0007165,GO:0016020,GO:0005524	AT1G27320.1	AHK3,HK3
Gorai.002G182200_D	2	1	11	histidine kinase 3	GO:0000156,GO:0000160,GO:0006355,GO:0000155,GO:0007165,GO:0016020,GO:0005524	AT1G27320.1	AHK3,HK3
Gorai.002G182300_D	1	2	1	Ribosome associated membrane protein RAMP4		AT1G27330.1
Gorai.002G182600_A	6	2	1	Galactose oxidase/kelch repeat superfamily protein	GO:0005515	AT1G27340.1
Gorai.002G182600_D	1	2	1	Galactose oxidase/kelch repeat superfamily protein	GO:0005515	AT1G27340.1
Gorai.002G182900_D	5	1	12	evolutionarily conserved C-terminal region 5		AT3G13060.2	ECT5
Gorai.002G184400_D	10	1	5			AT5G43230.1
Gorai.002G185300_D	1	2	10	vacuolar protein sorting 34	GO:0016773,GO:0035004,GO:0016303,GO:0046854,GO:0048015,GO:0005942,GO:0004428	AT1G60490.1	ATVPS34,PI3K,VPS34
Gorai.002G186000_D	21	12	2	Kelch repeat-containing F-box family protein	GO:0005515	AT1G23390.1
Gorai.002G186100_A	2	1	2	S-adenosyl-L-methionine-dependent methyltransferases superfamily protein	GO:0004719,GO:0006464,GO:0008168,GO:0008152	AT1G23360.1	MENG
Gorai.002G186100_D	2	1	7	S-adenosyl-L-methionine-dependent methyltransferases superfamily protein	GO:0004719,GO:0006464,GO:0008168,GO:0008152	AT1G23360.1	MENG
Gorai.002G186500_A	4	4	2	transporter associated with antigen processing protein 1	GO:0005524,GO:0016887,GO:0042626,GO:0006810,GO:0055085,GO:0016021	AT1G70610.1	ATTAP1,TAP1
Gorai.002G186500_D	2	4	2	transporter associated with antigen processing protein 1	GO:0005524,GO:0016887,GO:0042626,GO:0006810,GO:0055085,GO:0016021	AT1G70610.1	ATTAP1,TAP1
Gorai.002G186600_D	9	6	4	Tetratricopeptide repeat (TPR)-like superfamily protein		AT3G26580.1
Gorai.002G186900_A	4	4	7	Copper amine oxidase family protein	GO:0005507,GO:0008131,GO:0048038,GO:0009308,GO:0055114	AT2G42490.1
Gorai.002G187400_A	6	2	5	alpha/beta-Hydrolases superfamily protein		AT1G10740.1
Gorai.002G187400_D	22	6	1	alpha/beta-Hydrolases superfamily protein		AT1G10740.1
Gorai.002G187700_D	14	3	5	Phototropic-responsive NPH3 family protein	GO:0004871,GO:0009416	AT1G67900.1
Gorai.002G188300_D	4	4	2	sphere organelles protein-related		AT1G13030.1
Gorai.002G189600_D	1	2	4
Gorai.002G189700_A	2	1	2	TCP-1/cpn60 chaperonin family protein	GO:0005524,GO:0044267,GO:0051082,GO:0006457	AT1G24510.1
Gorai.002G190000_A	28	5	3	photosystem II BY	GO:0030145,GO:0015979,GO:0009523,GO:0016021	AT1G67740.1	PSBY,YCF32
Gorai.002G190100_D	26	10	3			AT1G24460.2
Gorai.002G190200_D	5	4	9
Gorai.002G190800_A	47	1	37	DEAD/DEAH box RNA helicase family protein	GO:0003676,GO:0005524,GO:0008026,GO:0004386,GO:0006310	AT1G27880.1
Gorai.002G191200_D	2	4	2	AMP-dependent synthetase and ligase family protein	GO:0003824,GO:0008152	AT5G63380.1
Gorai.002G191900_D	2	1	2			AT3G01860.1
Gorai.002G192400_A	5	5	2	N-terminal nucleophile aminohydrolases (Ntn hydrolases) superfamily protein	GO:0004298,GO:0051603,GO:0005839	AT3G26340.1
Gorai.002G192600_A	8	9	35	ER lumen protein retaining receptor family protein	GO:0046923,GO:0006621,GO:0016021	AT2G21190.1
Gorai.002G192700_A	10	1	6			AT4G30150.1
Gorai.002G192900_A	5	1	2	triosephosphate isomerase	GO:0004807,GO:0008152	AT2G21170.1	PDTPI,TIM
Gorai.002G193000_A	1	14	1	Mitochondrial transcription termination factor family protein		AT5G07900.1
Gorai.002G193000_D	12	2	12	Mitochondrial transcription termination factor family protein		AT5G07900.1
Gorai.002G193200_A	2	1	2		GO:0005515	AT5G14230.1
Gorai.002G193200_D	2	22	2		GO:0005515	AT5G14230.1
Gorai.002G193600_A	12	1	1	rotamase CYP 3	GO:0003755,GO:0006457	AT2G16600.1	ROC3
Gorai.002G193900_D	5	1	8	Amidase family protein	GO:0016884	AT4G34880.1
Gorai.002G195000_A	1	2	1	glycine-rich protein 2B	GO:0003676,GO:0008270,GO:0003677,GO:0006355	AT2G21060.1	ATCSP4,ATGRP2B,GRP2B
Gorai.002G195100_A	8	2	3	glycine-rich protein 2B	GO:0003676,GO:0008270,GO:0003677,GO:0006355	AT2G21060.1	ATCSP4,ATGRP2B,GRP2B
Gorai.002G195100_D	1	2	1	glycine-rich protein 2B	GO:0003676,GO:0008270,GO:0003677,GO:0006355	AT2G21060.1	ATCSP4,ATGRP2B,GRP2B
Gorai.002G195400_D	6	2	1	Pathogenesis-related thaumatin superfamily protein		AT4G38670.1
Gorai.002G195700_D	34	2	2	Major facilitator superfamily protein		AT4G34950.1
Gorai.002G195800_D	16	2	2	Plasma-membrane choline transporter family protein		AT4G38640.1
Gorai.002G196300_D	5	4	7	histidine biosynthesis bifunctional protein (HISIE)	GO:0004635,GO:0000105	AT1G31860.1	AT-IE,HISN2
Gorai.002G197000_A	5	4	2	embryo defective 2735		AT5G06240.1	emb2735
Gorai.002G197400_A	15	8	12	minichromosome maintenance 10	GO:0006260,GO:0005634	AT2G20980.1	MCM10
Gorai.002G197400_D	17	3	46	minichromosome maintenance 10	GO:0006260,GO:0005634	AT2G20980.1	MCM10
Gorai.002G197500_A	2	1	11	RAC-like 3	GO:0005525,GO:0007264,GO:0005622	AT4G35020.1	ARAC3,ATROP6,RAC3,RHO1PS,ROP6
Gorai.002G197700_A	1	2	1	Protein kinase protein with adenine nucleotide alpha hydrolases-like domain	GO:0004672,GO:0005524,GO:0006468,GO:0006950	AT2G16750.1
Gorai.002G197700_D	1	2	1	Protein kinase protein with adenine nucleotide alpha hydrolases-like domain	GO:0004672,GO:0005524,GO:0006468,GO:0006950	AT2G16750.1
Gorai.002G198000_A	1	2	1	farnesylated protein 6	GO:0046872,GO:0030001	AT4G38580.1	ATFP6,FP6,HIPP26
Gorai.002G198700_A	12	25	1	S phase kinase-associated protein 1	GO:0006511	AT1G75950.1	ASK1,ATSKP1,SKP1,SKP1A,UIP1
Gorai.002G199000_D	12	1	1	GCIP-interacting family protein		AT2G16860.1
Gorai.002G199100_D	2	1	2	Cupredoxin superfamily protein	GO:0005507,GO:0009055	AT5G26330.1
Gorai.002G201200_A	6	2	1	ACT-like protein tyrosine kinase family protein	GO:0004672,GO:0005524,GO:0006468,GO:0016597,GO:0008152	AT4G38470.1
Gorai.002G201200_D	1	2	1	ACT-like protein tyrosine kinase family protein	GO:0004672,GO:0005524,GO:0006468,GO:0016597,GO:0008152	AT4G38470.1
Gorai.002G201600_D	2	7	11			AT4G38440.1
Gorai.002G202100_A	12	4	1			AT1G16210.1
Gorai.002G202500_D	1	2	1	LYS/HIS transporter 7		AT4G35180.1	LHT7
Gorai.002G203200_D	3	2	17	expansin-like A1		AT3G45970.1	ATEXLA1,ATEXPL1,ATHEXP BETA 2.1,EXLA1,EXPL1
Gorai.002G205500_A	1	2	1	O-fucosyltransferase family protein		AT1G20550.1
Gorai.002G205500_D	1	2	1	O-fucosyltransferase family protein		AT1G20550.1
Gorai.002G205900_A	11	1	2	coenzyme Q 3	GO:0008610,GO:0008168,GO:0008757,GO:0009312,GO:0009877,GO:0008276,GO:0006479,GO:0005737,GO:0008152	AT2G30920.1	ATCOQ3,COQ3,EMB3002
Gorai.002G205900_D	2	1	2	coenzyme Q 3	GO:0008610,GO:0008168,GO:0008757,GO:0009312,GO:0009877,GO:0008276,GO:0006479,GO:0005737,GO:0008152	AT2G30920.1	ATCOQ3,COQ3,EMB3002
Gorai.002G206300_A	4	7	7	coenzyme Q 3	GO:0008610,GO:0008168,GO:0008757,GO:0009312,GO:0009877,GO:0008276,GO:0006479,GO:0005737,GO:0008152	AT2G30920.1	ATCOQ3,COQ3,EMB3002
Gorai.002G206400_A	10	1	6	ubiquitin family protein	GO:0005515	AT2G17200.1	DSK2
Gorai.002G206400_D	1	6	1	ubiquitin family protein	GO:0005515	AT2G17200.1	DSK2
Gorai.002G206500_D	10	1	8	Integral membrane protein hemolysin-III homolog		AT2G45250.1
Gorai.002G206800_D	11	1	32	Patched family protein	GO:0008158,GO:0016020	AT4G38350.1
Gorai.002G207000_A	1	2	1	Basic-leucine zipper (bZIP) transcription factor family protein	GO:0003700,GO:0043565,GO:0046983,GO:0006355	AT5G44080.1
Gorai.002G207200_A	1	3	1	nodulin MtN21 /EamA-like transporter family protein	GO:0016020	AT1G25270.1
Gorai.002G207300_A	2	1	11	actin 7		AT5G09810.1	ACT7
Gorai.002G208000_D	20	2	71	Protein of unknown function (DUF1644)		AT1G68140.1
Gorai.002G208300_A	24	5	9	Ribosomal protein L17 family protein	GO:0003735,GO:0006412,GO:0005622,GO:0005840	AT5G09770.1
Gorai.002G208500_D	2	1	6	partner of Y14-MAGO	GO:0005515	AT1G11400.1	PYM
Gorai.002G208600_A	1	2	1	Lung seven transmembrane receptor family protein	GO:0016021	AT2G01070.1
Gorai.002G208600_D	1	2	1	Lung seven transmembrane receptor family protein	GO:0016021	AT2G01070.1
Gorai.002G209600_A	12	6	6	GNS1/SUR4 membrane protein family	GO:0016021	AT3G06470.1
Gorai.002G209900_A	2	1	6	RHOMBOID-like protein 10	GO:0004252,GO:0016021,GO:0006508	AT1G25290.2	ATRBL10,RBL10
Gorai.002G211600_A	1	2	1			AT5G64510.1
Gorai.002G211800_A	2	1	2	seryl-tRNA synthetase / serine--tRNA ligase	GO:0000166,GO:0004812,GO:0005524,GO:0006418,GO:0005737,GO:0004828,GO:0006434,GO:0006412	AT5G27470.1
Gorai.002G211800_D	2	1	2	seryl-tRNA synthetase / serine--tRNA ligase	GO:0000166,GO:0004812,GO:0005524,GO:0006418,GO:0005737,GO:0004828,GO:0006434,GO:0006412	AT5G27470.1
Gorai.002G211900_A	1	2	1	Leucine-rich receptor-like protein kinase family protein	GO:0004672,GO:0005524,GO:0006468	AT1G09970.1	LRR XI-23,RLK7
Gorai.002G211900_D	1	2	1	Leucine-rich receptor-like protein kinase family protein	GO:0004672,GO:0005524,GO:0006468	AT1G09970.1	LRR XI-23,RLK7
Gorai.002G212200_A	25	4	80
Gorai.002G213100_A	12	6	12	high affinity K+ transporter 5	GO:0015079,GO:0071805,GO:0016020	AT4G13420.1	ATHAK5,HAK5
Gorai.002G214200_A	29	3	1	long-chain acyl-CoA synthetase 2	GO:0003824,GO:0008152	AT1G49430.1	LACS2,LRD2
Gorai.002G214300_D	2	1	2	extra-large G-protein 1	GO:0004871,GO:0019001,GO:0007186	AT2G23460.1	ATXLG1,XLG1
Gorai.002G214800_A	22	6	17	Protein kinase superfamily protein	GO:0004672,GO:0005524,GO:0006468	AT5G23170.1
Gorai.002G215000_A	2	12	2	TCP family transcription factor		AT1G58100.1
Gorai.002G215000_D	2	12	2	TCP family transcription factor		AT1G58100.1
Gorai.002G216600_D	8	6	3	Protein of unknown function (DUF679)		AT3G02430.1
Gorai.002G216900_A	2	1	2	Pseudouridine synthase family protein	GO:0003723,GO:0009982,GO:0001522,GO:0009451	AT1G09800.1
Gorai.002G218200_A	1	2	16	Glycinamide ribonucleotide (GAR) synthetase	GO:0003824,GO:0005524,GO:0008152,GO:0004637,GO:0009113	AT1G09830.1
Gorai.002G218400_D	1	2	1	B-box type zinc finger protein with CCT domain	GO:0008270,GO:0005622,GO:0005515	AT1G25440.1
Gorai.002G218700_A	2	1	6	GTP-binding family protein	GO:0003924,GO:0005525,GO:0015093,GO:0015684,GO:0016021,GO:0007264,GO:0005622	AT1G30960.1
Gorai.002G218700_D	10	1	2	GTP-binding family protein	GO:0003924,GO:0005525,GO:0015093,GO:0015684,GO:0016021,GO:0007264,GO:0005622	AT1G30960.1
Gorai.002G218900_A	11	9	2	Mitochondrial transcription termination factor family protein		AT5G07900.1
Gorai.002G219300_A	1	2	1	Calcineurin-like metallo-phosphoesterase superfamily protein		AT1G53710.2
Gorai.002G219300_D	12	10	37	Calcineurin-like metallo-phosphoesterase superfamily protein		AT1G53710.2
Gorai.002G219400_A	2	1	2	acetyl-CoA carboxylase 1	GO:0003824,GO:0008152,GO:0016874,GO:0005524,GO:0046872,GO:0008716,GO:0003989,GO:0006633	AT1G36160.1	ACC1,AT-ACC1,EMB22,GK,PAS3
Gorai.002G219400_D	2	12	2	acetyl-CoA carboxylase 1	GO:0003824,GO:0008152,GO:0016874,GO:0005524,GO:0046872,GO:0008716,GO:0003989,GO:0006633	AT1G36160.1	ACC1,AT-ACC1,EMB22,GK,PAS3
Gorai.002G220000_A	2	1	2	4-phospho-panto-thenoylcysteine synthetase		AT1G12350.1	ATCOAB,COAB
Gorai.002G220000_D	2	1	2	4-phospho-panto-thenoylcysteine synthetase		AT1G12350.1	ATCOAB,COAB
Gorai.002G220100_A	25	2	20	Translation initiation factor IF2/IF5	GO:0003743,GO:0006413,GO:0005488	AT1G36730.1
Gorai.002G220100_D	8	9	31	Translation initiation factor IF2/IF5	GO:0003743,GO:0006413,GO:0005488	AT1G36730.1
Gorai.002G220300_A	7	8	1	PHD finger family protein		AT1G77800.2
Gorai.002G220300_D	7	8	1	PHD finger family protein		AT1G77800.2
Gorai.002G221000_A	2	1	2	Peptidase M20/M25/M40 family protein	GO:0016787,GO:0008152,GO:0008233,GO:0006508	AT1G44820.1
Gorai.002G221500_A	6	2	1			AT1G44770.1
Gorai.002G221800_A	25	15	36
Gorai.002G221900_D	2	4	8	ARM repeat superfamily protein		AT1G77600.2
Gorai.002G222100_D	1	2	10			AT4G08330.1
Gorai.002G222800_A	2	1	7	S-adenosyl-L-methionine-dependent methyltransferases superfamily protein		AT5G44600.1
Gorai.002G222800_D	15	36	12	S-adenosyl-L-methionine-dependent methyltransferases superfamily protein		AT5G44600.1
Gorai.002G224200_A	9	2	3	Cation efflux family protein	GO:0008324,GO:0006812,GO:0055085,GO:0016021	AT3G12100.1
Gorai.002G224900_A	7	7	2	KH domain-containing protein / zinc finger (CCCH type) family protein	GO:0003723,GO:0003676,GO:0008270	AT5G06770.1
Gorai.002G225000_A	2	1	2	Rhodanese/Cell cycle control phosphatase superfamily protein		AT2G42220.1
Gorai.002G225200_D	1	2	19			AT3G57930.1
Gorai.002G225800_A	1	2	1	alpha-L-arabinofuranosidase 1	GO:0046556,GO:0046373	AT3G10740.1	ARAF,ARAF1,ASD1,ATASD1
Gorai.002G225900_D	2	1	2	PENTATRICOPEPTIDE REPEAT 596		AT1G80270.1	PPR596
Gorai.002G226100_A	12	44	1	P-loop containing nucleoside triphosphate hydrolases superfamily protein	GO:0005525,GO:0005622	AT2G41670.1
Gorai.002G226100_D	7	4	41	P-loop containing nucleoside triphosphate hydrolases superfamily protein	GO:0005525,GO:0005622	AT2G41670.1
Gorai.002G226600_D	7	8	41	glutamate synthase 1	GO:0008152,GO:0016491,GO:0055114,GO:0015930,GO:0016638,GO:0006537,GO:0006807	AT5G04140.1	FD-GOGAT,GLS1,GLU1,GLUS
Gorai.002G227000_D	15	2	12
Gorai.002G227100_D	2	1	7
Gorai.002G227300_A	20	2	9
Gorai.002G227600_A	5	10	7	S-formylglutathione hydrolase	GO:0008236,GO:0006508,GO:0016787,GO:0018738,GO:0016023,GO:0004091	AT2G41530.1	ATSFGH,SFGH
Gorai.002G227900_D	2	1	2	UDP-glycosyltransferase 73B4	GO:0016758,GO:0008152	AT2G15490.1	UGT73B4
Gorai.002G228100_D	1	2	10	Tubulin binding cofactor C domain-containing protein		AT3G57890.1
Gorai.002G228400_A	11	9	2	Ribosomal protein L6 family protein	GO:0003735,GO:0006412,GO:0005622,GO:0005840	AT1G74050.1
Gorai.002G228400_D	11	5	2	Ribosomal protein L6 family protein	GO:0003735,GO:0006412,GO:0005622,GO:0005840	AT1G74050.1
Gorai.002G228700_A	13	5	2	cytochrome P450, family 93, subfamily D, polypeptide 1	GO:0005506,GO:0009055,GO:0016705,GO:0020037,GO:0055114	AT5G06900.1	CYP93D1
Gorai.002G229200_A	1	2	19	A20/AN1-like zinc finger family protein	GO:0008270,GO:0003677	AT1G51200.1
Gorai.002G229300_A	18	11	8	Chaperone DnaJ-domain superfamily protein	GO:0031072	AT3G12170.1
Gorai.002G229400_D	1	4	1	NIMA-related kinase 5	GO:0004672,GO:0005524,GO:0006468	AT3G20860.1	ATNEK5,NEK5
Gorai.002G231100_A	1	2	103	NagB/RpiA/CoA transferase-like superfamily protein	GO:0005524,GO:0030272,GO:0009396	AT1G76730.1
Gorai.002G231100_D	26	1	3	NagB/RpiA/CoA transferase-like superfamily protein	GO:0005524,GO:0030272,GO:0009396	AT1G76730.1
Gorai.002G231300_D	10	1	9	Pyridoxal phosphate (PLP)-dependent transferases superfamily protein	GO:0016831,GO:0030170,GO:0019752	AT1G43710.1	emb1075
Gorai.002G231600_D	35	6	28	NAD(P)-binding Rossmann-fold superfamily protein	GO:0016491,GO:0008152,GO:0003854,GO:0016616,GO:0006694,GO:0055114,GO:0003824,GO:0050662,GO:0044237,GO:0009058	AT1G68540.1
Gorai.002G231800_A	11	5	2	Translation protein SH3-like family protein	GO:0003735,GO:0006412,GO:0005622,GO:0005840	AT1G09690.1
Gorai.002G231800_D	11	5	2	Translation protein SH3-like family protein	GO:0003735,GO:0006412,GO:0005622,GO:0005840	AT1G09690.1
Gorai.002G232200_A	21	1	5	P-loop containing nucleoside triphosphate hydrolases superfamily protein	GO:0003676,GO:0005524,GO:0008026,GO:0004386	AT2G42520.1
Gorai.002G232700_D	49	8	1	ubiquitin-specific protease 12	GO:0004221,GO:0006511,GO:0005515	AT5G06600.2	UBP12
Gorai.002G233300_A	6	2	15			AT3G54750.3
Gorai.002G233300_D	1	2	16			AT3G54750.3
Gorai.002G233500_D	9	2	4	ABC-2 type transporter family protein	GO:0005524,GO:0016887,GO:0016020	AT5G06530.1
Gorai.002G233900_A	16	5	2	DNAJ heat shock N-terminal domain-containing protein	GO:0031072,GO:0006457	AT5G06410.1
Gorai.002G234100_D	2	1	2			AT3G11760.1
Gorai.002G234200_A	8	2	3			AT3G44150.1
Gorai.002G234200_D	8	2	3			AT3G44150.1
Gorai.002G235300_D	2	1	2	Leucine-rich repeat protein kinase family protein	GO:0004672,GO:0005524,GO:0006468,GO:0005515	AT2G01820.1
Gorai.002G235400_A	4	4	2			AT3G09180.1
Gorai.002G235800_D	1	2	1	NDR1/HIN1-like 1		AT3G11660.1	NHL1
Gorai.002G236400_A	2	1	2	Ovate family protein		AT2G36026.1
Gorai.002G236600_A	1	2	19	ubiquitin E2 variant 1D-4	GO:0016881	AT3G52560.1	MMZ4,UEV1D,UEV1D-4
Gorai.002G237100_A	4	4	7
Gorai.002G237500_A	22	6	4	NAD(P)-binding Rossmann-fold superfamily protein	GO:0016491,GO:0008152	AT1G52340.1	ABA2,ATABA2,ATSDR1,GIN1,ISI4,SDR1,SIS4,SRE1
Gorai.002G237800_A	6	2	24	alpha/beta-Hydrolases superfamily protein	GO:0008236,GO:0006508	AT2G24280.1
Gorai.002G238900_D	2	1	2	probable small nuclear ribonucleoprotein G		AT2G23930.1	SNRNP-G
Gorai.002G239000_A	1	2	1	Rho GTPase activating protein with PAK-box/P21-Rho-binding domain	GO:0007165,GO:0005622,GO:0005515	AT5G22400.1
Gorai.002G239000_D	1	9	1	Rho GTPase activating protein with PAK-box/P21-Rho-binding domain	GO:0007165,GO:0005622,GO:0005515	AT5G22400.1
Gorai.002G239200_D	2	1	6	RNA-binding (RRM/RBD/RNP motifs) family protein	GO:0003676	AT3G52660.1
Gorai.002G239400_A	10	7	2	F-box family protein	GO:0005515	AT1G57790.1
Gorai.002G239600_A	1	2	1			AT3G52710.1
Gorai.002G239600_D	1	2	1			AT3G52710.1
Gorai.002G239700_A	10	7	7	Thioredoxin family protein	GO:0009055,GO:0015035,GO:0045454	AT5G03880.1
Gorai.002G239900_D	15	9	12	Iron-sulphur cluster biosynthesis family protein		AT5G03905.1
Gorai.002G240200_A	31	24	33			AT3G52740.1
Gorai.002G240400_A	2	1	2	Tubulin/FtsZ family protein	GO:0051258,GO:0043234	AT2G36250.1	ATFTSZ2-1,FTSZ2-1
Gorai.002G240400_D	45	1	6	Tubulin/FtsZ family protein	GO:0051258,GO:0043234	AT2G36250.1	ATFTSZ2-1,FTSZ2-1
Gorai.002G240700_D	8	2	19	Integral membrane Yip1 family protein	GO:0016020	AT3G52760.1
Gorai.002G241500_A	17	1	1	Family of unknown function (DUF662)		AT2G36410.2
Gorai.002G241500_D	10	8	15	Family of unknown function (DUF662)		AT2G36410.2
Gorai.002G242400_D	22	13	1	PHYTOSULFOKINE 3 PRECURSOR	GO:0008083,GO:0008283,GO:0005576	AT3G44735.1	ATPSK3,PSK1,PSK3
Gorai.002G243500_A	3	2	13	Protein of unknown function (DUF668)		AT3G23160.1
Gorai.002G243500_D	10	7	14	Protein of unknown function (DUF668)		AT3G23160.1
Gorai.002G243700_A	2	1	2	Pyruvate kinase family protein	GO:0000287,GO:0004743,GO:0030955,GO:0006096	AT3G52990.1
Gorai.002G243700_D	2	1	2	Pyruvate kinase family protein	GO:0000287,GO:0004743,GO:0030955,GO:0006096	AT3G52990.1
Gorai.002G243800_A	2	1	2	Pyruvate kinase family protein	GO:0000287,GO:0004743,GO:0030955,GO:0006096	AT3G52990.1
Gorai.002G244300_D	2	5	2	ribosomal protein L24	GO:0006412,GO:0005840,GO:0003735	AT2G36620.1	RPL24A
Gorai.002G245200_D	6	20	5	FKBP-like peptidyl-prolyl cis-trans isomerase family protein	GO:0006457	AT3G10060.1
Gorai.002G245600_A	10	1	11	phosphatidyl inositol monophosphate 5 kinase	GO:0016307,GO:0046488	AT3G09920.1	PIP5K9
Gorai.002G246500_A	2	1	7			AT2G36885.1
Gorai.002G246600_A	2	1	2	5\'-AMP-activated protein kinase-related		AT5G03420.1
Gorai.002G246600_D	2	4	2	5\'-AMP-activated protein kinase-related		AT5G03420.1
Gorai.002G246800_A	2	1	2	ATP binding cassette subfamily B1	GO:0005524,GO:0016887,GO:0042626,GO:0006810,GO:0055085,GO:0016021	AT2G36910.1	ABCB1,ATPGP1,PGP1
Gorai.002G247000_A	2	1	2	Transcription factor DP	GO:0003700,GO:0006355,GO:0005667	AT5G03415.1	ATDPB,DPB
Gorai.002G247000_D	2	1	9	Transcription factor DP	GO:0003700,GO:0006355,GO:0005667	AT5G03415.1	ATDPB,DPB
Gorai.002G247600_A	20	6	9	Galactose oxidase/kelch repeat superfamily protein	GO:0005515	AT4G19870.1
Gorai.002G248000_D	13	3	11	PHE ammonia lyase 1	GO:0016841,GO:0009058	AT2G37040.1	ATPAL1,PAL1
Gorai.002G248200_A	25	1	33	cyclic nucleotide-gated channel 15	GO:0005216,GO:0006811,GO:0055085,GO:0016020	AT2G28260.1	ATCNGC15,CNGC15
Gorai.002G249400_A	1	2	19	PLAC8 family protein		AT2G37110.1
Gorai.002G249400_D	9	2	19	PLAC8 family protein		AT2G37110.1
Gorai.002G249500_A	2	1	2			AT5G03120.1
Gorai.002G249500_D	14	4	11			AT5G03120.1
Gorai.002G250400_A	7	7	1	Tudor/PWWP/MBT superfamily protein		AT5G02950.1
Gorai.002G250600_A	1	2	3	nuclear factor Y, subunit B8	GO:0003677,GO:0043565,GO:0005622	AT2G37060.1	NF-YB8
Gorai.002G251800_D	9	2	10	Protein kinase superfamily protein	GO:0004672,GO:0005524,GO:0006468	AT5G02800.1
Gorai.002G252100_D	2	1	2	integral membrane TerC family protein	GO:0016021	AT5G12130.1	ATTERC,PDE149
Gorai.002G252200_A	9	2	19			AT3G53490.1
Gorai.002G252500_A	7	8	50	arginine/serine-rich zinc knuckle-containing protein 33	GO:0003676,GO:0008270	AT2G37340.1	ATRSZ33,RSZ33
Gorai.002G253300_A	9	2	10	UDP-glucuronic acid decarboxylase 1	GO:0003854,GO:0016616,GO:0006694,GO:0055114,GO:0003824,GO:0050662,GO:0044237,GO:0009058,GO:0008831,GO:0045226	AT3G53520.1	ATUXS1,UXS1
Gorai.002G253300_D	9	2	10	UDP-glucuronic acid decarboxylase 1	GO:0003854,GO:0016616,GO:0006694,GO:0055114,GO:0003824,GO:0050662,GO:0044237,GO:0009058,GO:0008831,GO:0045226	AT3G53520.1	ATUXS1,UXS1
Gorai.002G253400_D	8	2	37	Chloroplast-targeted copper chaperone protein	GO:0046872,GO:0030001	AT2G37390.1
Gorai.002G253600_D	12	6	2	Pentatricopeptide repeat (PPR) superfamily protein		AT5G42450.1
Gorai.002G253700_A	1	2	3	Protein of unknown function (DUF1635)		AT2G28690.1
Gorai.002G253800_A	9	6	26	Ras-related small GTP-binding family protein	GO:0003924,GO:0005525,GO:0007264,GO:0005634,GO:0005737,GO:0005622	AT5G59840.1
Gorai.002G253800_D	9	6	3	Ras-related small GTP-binding family protein	GO:0003924,GO:0005525,GO:0007264,GO:0005634,GO:0005737,GO:0005622	AT5G59840.1
Gorai.002G254700_D	8	2	3	actin depolymerizing factor 3	GO:0003779,GO:0005622	AT5G59880.1	ADF3
Gorai.002G254800_A	8	2	3	actin depolymerizing factor 1	GO:0003779,GO:0005622	AT3G46010.1	ADF1,atadf,ATADF1
Gorai.002G254800_D	8	2	19	actin depolymerizing factor 1	GO:0003779,GO:0005622	AT3G46010.1	ADF1,atadf,ATADF1
Gorai.002G255100_D	1	6	1	cation/H+ exchanger 20	GO:0015299,GO:0006812,GO:0055085,GO:0016021	AT3G53720.1	ATCHX20,CHX20
Gorai.002G255300_A	20	2	9	RNA-binding (RRM/RBD/RNP motifs) family protein	GO:0003676	AT5G54580.1
Gorai.002G255800_A	12	2	25	POX (plant homeobox) family protein	GO:0003700,GO:0043565,GO:0006355,GO:0003677,GO:0005634	AT5G02030.1	BLH9,BLR,HB-6,LSN,PNY,RPL,VAN
Gorai.002G256100_D	10	1	61	Protein of unknown function (DUF3411)		AT2G37860.3	LCD1
Gorai.002G256300_A	1	2	1			AT5G02090.1
Gorai.002G256300_D	1	2	4			AT5G02090.1
Gorai.002G257000_D	26	42	1	DHHC-type zinc finger family protein	GO:0008270	AT3G09320.1
Gorai.002G257100_A	1	2	16	laccase 17	GO:0016491,GO:0055114,GO:0005507	AT5G60020.1	ATLAC17,LAC17
Gorai.002G257300_D	3	23	16	Haloacid dehalogenase-like hydrolase (HAD) superfamily protein		AT5G02230.1
Gorai.002G258000_D	16	6	7			AT5G02420.1
Gorai.002G258300_A	7	11	1	HSP20-like chaperones superfamily protein		AT2G37570.1	SLT1
Gorai.002G258400_A	6	30	1	HSP20-like chaperones superfamily protein		AT2G37570.1	SLT1
Gorai.002G259300_A	22	2	17	PAR1 protein		AT3G54040.1
Gorai.002G259600_A	20	6	9	PAR1 protein		AT3G54040.1
Gorai.002G259600_D	12	15	43	PAR1 protein		AT3G54040.1
Gorai.002G260400_A	10	1	13	Neutral/alkaline non-lysosomal ceramidase		AT2G38010.1
Gorai.002G260600_A	2	1	6	Josephin family protein	GO:0008242	AT3G54130.1
Gorai.002G260800_D	2	1	2	Cysteine proteinases superfamily protein		AT2G38025.1
Gorai.002G261300_D	2	1	101			AT3G09050.1
Gorai.002G261800_D	1	2	1			AT3G09032.1
Gorai.002G262500_D	5	1	2	ARM repeat superfamily protein	GO:0008565,GO:0006886	AT3G08960.1
Gorai.002G262700_A	11	10	2	metallopeptidase M24 family protein	GO:0009987	AT3G51800.3	ATEBP1,ATG2,EBP1
Gorai.002G263000_D	2	1	6	S-adenosyl-L-methionine-dependent methyltransferases superfamily protein	GO:0008168,GO:0008152	AT5G04060.1
Gorai.002G263400_A	2	1	2	Aldolase-type TIM barrel family protein	GO:0042823,GO:0009228	AT5G01410.1	ATPDX1,ATPDX1.3,PDX1,PDX1.3,RSR4
Gorai.002G263500_D	2	1	2	RING/U-box superfamily protein		AT5G01450.1
Gorai.002G264500_D	1	2	9	receptor like protein 7	GO:0005515	AT1G47890.1	AtRLP7,RLP7
Gorai.002G265000_A	9	2	12	transmembrane protein G1P-related 1	GO:0017003,GO:0017004,GO:0005886	AT3G51790.1	ATG1,TG1
Gorai.002G266500_A	1	2	3	prenylated RAB acceptor 1.B4		AT2G38360.1	PRA1.B4
Gorai.002G266500_D	1	2	3	prenylated RAB acceptor 1.B4		AT2G38360.1	PRA1.B4
Gorai.002G266600_A	8	2	10	Tautomerase/MIF superfamily protein		AT5G01650.1
Gorai.002G267700_A	2	1	2	tRNA synthetase class I (I, L, M and V) family protein	GO:0000166,GO:0004812,GO:0005524,GO:0006418,GO:0005737,GO:0006412	AT4G10320.1
Gorai.002G268000_D	1	2	1	Cystatin/monellin superfamily protein	GO:0004869	AT5G47550.1
Gorai.003G000400_A	5	4	45
Gorai.003G000500_A	5	1	54			AT2G18410.1
Gorai.003G000900_A	5	1	33	Auxin efflux carrier family protein	GO:0055085,GO:0016021	AT1G20925.1
Gorai.003G001000_D	2	1	2	kinesin-like calmodulin-binding protein (ZWICHEL)	GO:0003777,GO:0005524,GO:0007018,GO:0005856	AT5G65930.2	KCBP,PKCBP,ZWI
Gorai.003G001400_A	1	14	1	glutamate receptor 3.6	GO:0004970,GO:0005234,GO:0016020,GO:0005215,GO:0006810,GO:0030288	AT3G51480.1	ATGLR3.6,GLR3.6
Gorai.003G001500_A	1	2	15	Protein phosphatase 2C family protein	GO:0003824	AT3G51470.1
Gorai.003G001500_D	8	9	21	Protein phosphatase 2C family protein	GO:0003824	AT3G51470.1
Gorai.003G001700_A	1	2	1	Calcium-binding EF hand family protein		AT1G21630.2
Gorai.003G002200_D	1	2	1	WUSCHEL related homeobox 13	GO:0003700,GO:0043565,GO:0006355	AT4G35550.1	ATWOX13,HB-4,WOX13
Gorai.003G002800_A	1	2	56	catalase 2	GO:0004096,GO:0020037,GO:0055114,GO:0006979,GO:0005506	AT4G35090.1	CAT2
Gorai.003G005900_A	2	1	2			AT2G17710.1
Gorai.003G006000_A	2	1	2	aconitase 1	GO:0008152	AT4G35830.1	ACO1
Gorai.003G006000_D	2	1	2	aconitase 1	GO:0008152	AT4G35830.1	ACO1
Gorai.003G007100_D	1	2	1	RING/U-box superfamily protein		AT3G51325.1
Gorai.003G007300_A	1	15	19	E3 ubiquitin ligase SCF complex subunit SKP1/ASK1 family protein	GO:0006511	AT5G42190.1	ASK2,SKP1B
Gorai.003G007500_D	2	4	11	F-box family protein		AT4G35930.1
Gorai.003G007800_D	5	1	12	farnesylated protein 6	GO:0046872,GO:0030001	AT4G38580.1	ATFP6,FP6,HIPP26
Gorai.003G008600_A	13	3	11	Glycosyl hydrolase family 38 protein	GO:0004559,GO:0005975,GO:0015923,GO:0006013,GO:0004553,GO:0008270	AT5G66150.1
Gorai.003G008700_D	1	2	1	regulatory particle non-ATPase 10		AT4G38630.1	ATMCB1,MBP1,MCB1,RPN10
Gorai.003G008800_D	1	41	1	receptor homology region transmembrane domain ring H2 motif protein 1		AT5G66160.1	ATRMR1,RMR1
Gorai.003G009800_A	6	2	18	Plant protein of unknown function (DUF827)		AT2G17940.1
Gorai.003G009900_A	2	1	2
Gorai.003G009900_D	2	1	2
Gorai.003G010100_D	9	2	89			AT2G17972.1
Gorai.003G010300_A	1	11	1			AT2G17990.1
Gorai.003G010600_A	15	7	20			AT5G66290.1
Gorai.003G010900_A	9	15	19	ATPase, F0/V0 complex, subunit C protein	GO:0015078,GO:0015991,GO:0033177	AT1G19910.1	ATVHA-C2,AVA-2PE,AVA-P2
Gorai.003G010900_D	29	15	29	ATPase, F0/V0 complex, subunit C protein	GO:0015078,GO:0015991,GO:0033177	AT1G19910.1	ATVHA-C2,AVA-2PE,AVA-P2
Gorai.003G011200_A	2	1	7	B-box type zinc finger family protein	GO:0008270,GO:0005622	AT4G38960.1
Gorai.003G012200_D	1	15	1	ubiquitin-conjugating enzyme 16	GO:0016881	AT1G75440.1	UBC16
Gorai.003G012600_A	7	1	1	UDP-Glycosyltransferase superfamily protein	GO:0009058	AT1G75420.1
Gorai.003G012600_D	3	3	25	UDP-Glycosyltransferase superfamily protein	GO:0009058	AT1G75420.1
Gorai.003G013100_D	1	3	1	P-loop containing nucleoside triphosphate hydrolases superfamily protein	GO:0005524	AT5G17760.1
Gorai.003G013200_A	6	15	15	P-loop containing nucleoside triphosphate hydrolases superfamily protein	GO:0005524,GO:0009378,GO:0006281,GO:0006310	AT5G17760.1
Gorai.003G013300_A	16	9	2			AT3G50910.1
Gorai.003G013300_D	1	2	3			AT3G50910.1
Gorai.003G013900_D	2	1	11	anaphase promoting complex 10		AT2G18290.1	APC10
Gorai.003G014200_D	1	2	1	DNA glycosylase superfamily protein	GO:0006284	AT1G19480.1
Gorai.003G015100_D	3	2	14	Vacuolar sorting protein 39	GO:0006886,GO:0016192,GO:0005083	AT4G36630.1	EMB2754
Gorai.003G015200_A	1	2	19	Protein of unknown function (DUF59)		AT3G50845.1
Gorai.003G015200_D	1	2	1	Protein of unknown function (DUF59)		AT3G50845.1
Gorai.003G015300_D	15	14	1	Sec14p-like phosphatidylinositol transfer family protein		AT4G36640.1
Gorai.003G015500_A	20	2	9	succinate dehydrogenase 1-1	GO:0009055,GO:0016491,GO:0055114	AT5G66760.1	SDH1-1
Gorai.003G016200_D	1	2	36	indeterminate(ID)-domain 2		AT3G50700.1	AtIDD2,IDD2
Gorai.003G016700_A	15	2	27	Quinone reductase family protein	GO:0010181,GO:0016491,GO:0009055,GO:0050662	AT4G36750.1
Gorai.003G016700_D	9	2	89	Quinone reductase family protein	GO:0010181,GO:0016491,GO:0009055,GO:0050662	AT4G36750.1
Gorai.003G017700_A	1	6	1	GNS1/SUR4 membrane protein family	GO:0016021	AT4G36830.1	HOS3-1
Gorai.003G017800_D	1	2	1	RING/U-box superfamily protein		AT2G23780.1
Gorai.003G018100_A	1	2	1	BEL1-like homeodomain 2	GO:0003700,GO:0043565,GO:0006355,GO:0003677,GO:0005634	AT4G36870.1	BLH2,SAW1
Gorai.003G019000_A	2	1	2	CAP (Cysteine-rich secretory proteins, Antigen 5, and Pathogenesis-related 1 protein) superfamily protein		AT5G66590.1
Gorai.003G019200_D	12	1	25	Phototropic-responsive NPH3 family protein	GO:0004871,GO:0009416	AT5G66560.1
Gorai.003G019300_D	12	2	72	Tetratricopeptide repeat (TPR)-like superfamily protein		AT4G37210.1
Gorai.003G021300_D	3	30	23	Homeodomain-like superfamily protein	GO:0003677	AT4G37180.1
Gorai.003G022800_A	1	2	4	P-loop containing nucleoside triphosphate hydrolases superfamily protein	GO:0008146	AT3G50620.1
Gorai.003G022900_D	1	11	1			AT5G66810.1
Gorai.003G023500_A	1	2	1	heat shock factor 4	GO:0003700,GO:0043565,GO:0006355,GO:0005634	AT4G36990.1	AT-HSFB1,ATHSF4,HSF4,HSFB1
Gorai.003G023500_D	1	2	1	heat shock factor 4	GO:0003700,GO:0043565,GO:0006355,GO:0005634	AT4G36990.1	AT-HSFB1,ATHSF4,HSF4,HSFB1
Gorai.003G024500_A	1	2	1	cytochrome P450, family 83, subfamily B, polypeptide 1	GO:0005506,GO:0009055,GO:0016705,GO:0020037,GO:0055114	AT4G31500.1	ATR4,CYP83B1,RED1,RNT1,SUR2
Gorai.003G025900_A	52	14	2	Integrase-type DNA-binding superfamily protein	GO:0003700,GO:0006355	AT4G36920.1	AP2,FL1,FLO2
Gorai.003G026200_A	2	1	2	P-loop containing nucleoside triphosphate hydrolases superfamily protein	GO:0003777,GO:0005524,GO:0007018	AT5G47820.1	FRA1
Gorai.003G026200_D	2	1	2	P-loop containing nucleoside triphosphate hydrolases superfamily protein	GO:0003777,GO:0005524,GO:0007018	AT5G47820.1	FRA1
Gorai.003G026300_D	3	3	1	Leucine-rich repeat protein kinase family protein	GO:0004672,GO:0005524,GO:0006468,GO:0005515	AT5G67200.1
Gorai.003G026600_A	12	23	24	WRKY DNA-binding protein 15	GO:0003700,GO:0043565,GO:0006355	AT2G23320.1	WRKY15
Gorai.003G026900_A	5	1	2	Rer1 family protein	GO:0016021	AT4G39220.1	ATRER1A
Gorai.003G027300_D	17	1	29	Leucine-rich repeat protein kinase family protein	GO:0004672,GO:0005524,GO:0006468,GO:0005515	AT4G37250.1
Gorai.003G027900_D	2	1	45	Eukaryotic aspartyl protease family protein	GO:0004190,GO:0006508	AT3G50050.1
Gorai.003G028500_D	17	1	15	alpha/beta-Hydrolases superfamily protein		AT4G37470.1
Gorai.003G028800_D	9	15	26	Uncharacterised protein family SERF		AT2G23090.1
Gorai.003G029100_D	7	7	3			AT4G33890.1
Gorai.003G029500_D	2	1	2	Phototropic-responsive NPH3 family protein	GO:0005515,GO:0004871,GO:0009416	AT2G14820.1	NPY2
Gorai.003G029600_D	16	5	2
Gorai.003G030700_A	42	1	22	ADP-ribosylation factor-like A1C	GO:0003924,GO:0005525,GO:0007264,GO:0005634,GO:0005737,GO:0005622	AT3G49870.1	ARLA1C,ATARLA1C
Gorai.003G030800_A	26	8	10	Homeodomain-like/winged-helix DNA-binding family protein	GO:0003677,GO:0006334,GO:0000786,GO:0005634	AT5G67580.1	ATTBP3,ATTRB2,TBP3,TRB2
Gorai.003G030900_D	2	1	6	N-acetyl-l-glutamate synthase 2	GO:0008080,GO:0008652,GO:0008152	AT4G37670.2	NAGS2
Gorai.003G031000_A	1	2	1	CCCH-type zinc fingerfamily protein with RNA-binding domain	GO:0003676	AT1G07360.1
Gorai.003G031900_D	22	2	1	phytosulfokine 4 precursor	GO:0008083,GO:0008283,GO:0005576	AT3G49780.1	ATPSK3 (FORMER SYMBOL),ATPSK4,PSK4
Gorai.003G032500_A	2	10	11	squalene epoxidase 3	GO:0009055,GO:0016491,GO:0055114,GO:0050660,GO:0008033,GO:0004506,GO:0016021	AT4G37760.1	SQE3
Gorai.003G032900_D	2	1	2			AT3G49720.1
Gorai.003G033300_A	6	2	13	Serine carboxypeptidase S28 family protein	GO:0008236,GO:0006508	AT5G65760.1
Gorai.003G033600_A	22	6	24	xyloglucan endotransglucosylase/hydrolase 6	GO:0004553,GO:0005975,GO:0016762,GO:0006073,GO:0005618,GO:0048046	AT5G65730.1	XTH6
Gorai.003G033900_A	8	10	4			AT2G22795.1
Gorai.003G034500_D	7	12	13	Leucine-rich receptor-like protein kinase family protein	GO:0004672,GO:0005524,GO:0006468,GO:0005515	AT5G65700.1	BAM1
Gorai.003G034700_A	2	1	2	basic helix-loop-helix (bHLH) DNA-binding superfamily protein	GO:0030528,GO:0006355	AT4G37850.1
Gorai.003G034700_D	31	15	18	basic helix-loop-helix (bHLH) DNA-binding superfamily protein	GO:0030528,GO:0006355	AT4G37850.1
Gorai.003G035000_D	1	8	1	SPT2 chromatin protein		AT2G22720.2
Gorai.003G036100_D	12	7	10
Gorai.003G036300_D	5	1	33	Concanavalin A-like lectin protein kinase family protein	GO:0004672,GO:0005524,GO:0006468,GO:0005488	AT5G10530.1
Gorai.003G037300_D	15	5	47			AT5G65495.1
Gorai.003G037400_A	1	2	1			AT5G65490.1
Gorai.003G038000_A	10	1	58	O-fucosyltransferase family protein		AT5G65470.1
Gorai.003G038100_A	2	1	6	Protein of unknown function (DUF630 and DUF632)		AT4G39790.1
Gorai.003G038600_D	11	1	2	Thioredoxin superfamily protein		AT4G39740.1
Gorai.003G038800_A	2	1	2	ARM-repeat/Tetratricopeptide repeat (TPR)-like protein		AT5G10200.1
Gorai.003G039000_A	1	2	1	TLD-domain containing nucleolar protein		AT4G39870.1
Gorai.003G039000_D	1	2	1	TLD-domain containing nucleolar protein		AT4G39870.1
Gorai.003G039200_D	45	10	6	Mitochondrial substrate carrier family protein		AT5G64970.1
Gorai.003G039800_D	23	2	4
Gorai.003G040200_D	1	2	81	Histone superfamily protein	GO:0003677,GO:0006334,GO:0005634,GO:0000786	AT3G53730.1
Gorai.003G040900_A	2	1	2	RAB GTPase homolog A4A	GO:0005525,GO:0007264,GO:0005622	AT5G65270.1	AtRABA4a,RABA4a
Gorai.003G041000_A	10	7	6	S-adenosyl-L-methionine-dependent methyltransferases superfamily protein		AT2G22400.1
Gorai.003G041600_D	12	6	5	helicase domain-containing protein / IBR domain-containing protein / zinc finger protein-related	GO:0003676,GO:0005524,GO:0008026,GO:0004386,GO:0008270	AT4G01020.1
Gorai.003G041700_A	1	2	1			AT2G46550.1
Gorai.003G042300_A	2	1	2	sulfotransferase 16	GO:0008146	AT1G74100.1	ATSOT16,ATST5A,CORI-7,SOT16
Gorai.003G043000_A	12	37	13	uncoupling protein 5		AT2G22500.1	ATPUMP5,DIC1,UCP5
Gorai.003G043300_A	7	8	1	ubiquitin-specific protease 17	GO:0004221,GO:0006511,GO:0008270	AT5G65450.1	UBP17
Gorai.003G043600_D	5	4	5	DNAse I-like superfamily protein		AT5G65090.1	BST1,DER4,MRH3
Gorai.003G044400_D	2	1	2	Thioesterase superfamily protein		AT5G10160.1
Gorai.003G044700_A	2	1	2	myo-inositol-1-phosphate synthase 2	GO:0004512,GO:0006021,GO:0008654	AT2G22240.1	ATIPS2,ATMIPS2,MIPS2
Gorai.003G044700_D	2	1	5	myo-inositol-1-phosphate synthase 2	GO:0004512,GO:0006021,GO:0008654	AT2G22240.1	ATIPS2,ATMIPS2,MIPS2
Gorai.003G045100_D	1	2	44	Cupredoxin superfamily protein	GO:0016491,GO:0055114,GO:0005507	AT4G39830.1
Gorai.003G045400_A	2	1	2	RNase L inhibitor protein-related		AT5G10070.1
Gorai.003G045800_A	1	2	10	RING-H2 finger A2A		AT1G15100.1	RHA2A
Gorai.003G046000_A	1	2	20
Gorai.003G046300_D	2	1	2	ABC2 homolog 13		AT5G64940.1	ATATH13,ATH13,ATOSA1,OSA1
Gorai.003G046700_D	10	7	2			AT5G09995.2
Gorai.003G047000_A	9	2	5	stress enhanced protein 2		AT2G21970.1	40787
Gorai.003G047600_A	7	28	1	general control non-repressible 5	GO:0005524,GO:0016887	AT5G64840.1	ATGCN5,GCN5
Gorai.003G047600_D	17	12	40	general control non-repressible 5	GO:0005524,GO:0016887	AT5G64840.1	ATGCN5,GCN5
Gorai.003G048400_A	1	2	1	Uncharacterised conserved protein UCP009193		AT4G09830.1
Gorai.003G049600_D	2	1	2	cinnamyl alcohol dehydrogenase 9	GO:0008270,GO:0016491,GO:0055114	AT4G39330.1	ATCAD9,CAD9
Gorai.003G050400_A	2	1	6	Auxin-responsive GH3 family protein		AT1G28130.1	GH3.17
Gorai.003G050700_D	2	1	2	Haloacid dehalogenase-like hydrolase (HAD) superfamily protein	GO:0003824,GO:0008152	AT1G79790.1
Gorai.003G050800_A	7	12	13	Pentatricopeptide repeat (PPR) superfamily protein		AT3G18110.1	EMB1270
Gorai.003G051500_A	1	6	1	Tudor/PWWP/MBT superfamily protein		AT3G03140.1
Gorai.003G051800_A	2	4	2	UDP-glucosyl transferase 78D2	GO:0016758,GO:0008152	AT5G17050.1	UGT78D2
Gorai.003G051900_A	10	7	2	exportin 1A	GO:0008565,GO:0006886	AT5G17020.1	ATCRM1,ATXPO1,HIT2,XPO1,XPO1A
Gorai.003G051900_D	2	7	2	exportin 1A	GO:0008565,GO:0006886	AT5G17020.1	ATCRM1,ATXPO1,HIT2,XPO1,XPO1A
Gorai.003G052100_A	2	1	2	4-coumarate:CoA ligase 3	GO:0003824,GO:0008152	AT1G65060.1	4CL3
Gorai.003G052100_D	2	1	2	4-coumarate:CoA ligase 3	GO:0003824,GO:0008152	AT1G65060.1	4CL3
Gorai.003G052200_A	2	1	2	cellulose synthase-like D3	GO:0016760,GO:0030244,GO:0016020	AT3G03050.1	ATCSLD3,CSLD3,KJK
Gorai.003G052300_A	9	2	19
Gorai.003G052400_D	8	2	3	Xyloglucan endotransglucosylase/hydrolase family protein	GO:0004553,GO:0005975,GO:0016762,GO:0006073,GO:0005618,GO:0048046	AT5G57560.1	TCH4,XTH22
Gorai.003G052600_D	2	1	22	3\'-5\'-exoribonuclease family protein	GO:0003723,GO:0006396	AT3G60500.1	CER7,G3
Gorai.003G052900_A	1	2	1	Target of Myb protein 1	GO:0006886,GO:0005622	AT5G16880.1
Gorai.003G052900_D	1	2	1	Target of Myb protein 1	GO:0006886,GO:0005622	AT5G16880.1
Gorai.003G053100_A	9	2	22	RNA-binding (RRM/RBD/RNP motifs) family protein	GO:0003676,GO:0055114,GO:0016491	AT4G17720.1
Gorai.003G053200_D	1	2	1	syntaxin of plants 21	GO:0005515	AT5G16830.1	ATPEP12,ATSYP21,PEP12,PEP12P,SYP21
Gorai.003G053300_A	24	2	16	heat shock factor 3	GO:0003700,GO:0043565,GO:0006355,GO:0005634	AT5G16820.1	ATHSF3,ATHSFA1B,HSF3,HSFA1B
Gorai.003G053400_A	25	1	36	Tetratricopeptide repeat (TPR)-like superfamily protein		AT5G41950.1
Gorai.003G053900_A	6	2	1	EXORDIUM like 6		AT3G02970.1	EXL6
Gorai.003G054900_D	2	1	7
Gorai.003G055700_D	1	2	1			AT1G65020.1
Gorai.003G056500_D	14	3	1	PLATZ transcription factor family protein		AT4G17900.1
Gorai.003G057200_A	16	5	27			AT5G16660.1
Gorai.003G058600_D	1	2	1	cytochrome P450, family 87, subfamily A, polypeptide 6	GO:0005506,GO:0009055,GO:0016705,GO:0020037,GO:0055114	AT1G64940.1	CYP89A6
Gorai.003G058700_D	2	7	5	Root hair defective 3 GTP-binding protein (RHD3)	GO:0003924,GO:0005525,GO:0016817	AT3G13870.1	RHD3
Gorai.003G059200_A	5	3	2	nucleosome assembly protein 1;2	GO:0006334,GO:0005634	AT2G19480.3	NAP1;2,NFA02,NFA2
Gorai.003G059400_D	38	6	5	Sodium Bile acid symporter family	GO:0008508,GO:0006814,GO:0016020	AT4G22840.1
Gorai.003G059500_D	2	1	2	beta galactosidase 1	GO:0004553,GO:0005975,GO:0005529,GO:0004565,GO:0009341	AT3G13750.1	BGAL1
Gorai.003G059900_A	9	6	26	PRA1 (Prenylated rab acceptor) family protein		AT1G55190.1	PRA1.F2,PRA7
Gorai.003G059900_D	9	2	19	PRA1 (Prenylated rab acceptor) family protein		AT1G55190.1	PRA1.F2,PRA7
Gorai.003G060200_D	10	1	2	Ubiquitin-conjugating enzyme family protein	GO:0005515	AT1G51730.1
Gorai.003G062300_A	2	1	49	ALG6, ALG8 glycosyltransferase family	GO:0016758,GO:0005789	AT2G44660.1
Gorai.003G062700_A	2	1	2	CDC27 family protein	GO:0005515	AT2G20000.1	CDC27b,HBT
Gorai.003G062800_A	3	13	16	Protein of unknown function (DUF1677)		AT1G79770.1
Gorai.003G063000_A	1	2	1
Gorai.003G063000_D	1	2	16
Gorai.003G063100_A	2	1	2	mitotic phosphoprotein N\' end (MPPN) family protein		AT3G16310.1
Gorai.003G063100_D	2	10	2	mitotic phosphoprotein N\' end (MPPN) family protein		AT3G16310.1
Gorai.003G063700_D	13	5	2	RNA 2\'-phosphotransferase, Tpt1 / KptA family	GO:0016772,GO:0006388	AT2G45330.1	emb1067
Gorai.003G064100_D	4	4	7	Predicted eukaryotic LigT	GO:0003723	AT3G16230.2
Gorai.003G064300_D	5	1	11	Isochorismatase family protein	GO:0003824,GO:0008152	AT3G16190.1
Gorai.003G065000_A	1	6	1	Sulfite exporter TauE/SafE family protein	GO:0016021	AT2G25737.1
Gorai.003G065700_D	2	1	7	Amino acid kinase family protein	GO:0008652	AT3G18680.1
Gorai.003G066000_D	2	1	2	small RNA degrading nuclease 3	GO:0003676,GO:0008408,GO:0006139,GO:0005622	AT5G67240.1	SDN3
Gorai.003G066800_D	1	2	1	regulatory particle AAA-ATPase 2A	GO:0005524	AT4G29040.1	RPT2a
Gorai.003G068000_A	7	12	17	Zinc finger C-x8-C-x5-C-x3-H type family protein	GO:0003676,GO:0008270	AT3G18640.1
Gorai.003G068100_A	24	30	9
Gorai.003G068300_A	12	8	2	TCP-1/cpn60 chaperonin family protein	GO:0005524,GO:0044267,GO:0051082,GO:0006457	AT3G11830.1
Gorai.003G069300_A	21	12	8	Pentatricopeptide repeat (PPR) superfamily protein		AT4G21190.1	emb1417
Gorai.003G069400_A	1	2	1	Tic22-like family protein		AT5G62650.1
Gorai.003G069600_A	16	5	2	with no lysine (K) kinase 6	GO:0004672,GO:0005524,GO:0006468	AT3G18750.1	ATWNK6,WNK6,ZIK5
Gorai.003G070100_A	12	6	38	RING/U-box superfamily protein		AT1G49230.1
Gorai.003G070500_D	11	1	76	Ubiquitin carboxyl-terminal hydrolase-related protein	GO:0004221,GO:0006511	AT3G47890.1
Gorai.003G070600_A	12	6	9
Gorai.003G071100_D	2	1	7	catalytics	GO:0016901,GO:0048038,GO:0005975	AT1G74790.1
Gorai.003G071500_A	25	7	84	myb-like transcription factor family protein	GO:0003677	AT5G47390.1
Gorai.003G071500_D	25	2	56	myb-like transcription factor family protein	GO:0003677	AT5G47390.1
Gorai.003G071900_A	1	7	1	ARM repeat superfamily protein	GO:0005515	AT5G62580.1
Gorai.003G072300_D	2	12	2	Duplicated homeodomain-like superfamily protein		AT1G76890.2	AT-GT2,GT2
Gorai.003G072800_D	52	9	7	Ribosomal protein L6 family	GO:0003735,GO:0019843,GO:0006412,GO:0005840	AT1G33140.1	PGY2
Gorai.003G073000_D	6	3	17			AT1G63310.1
Gorai.003G073700_A	6	2	40	F-box family protein	GO:0005515	AT3G44326.1
Gorai.003G074000_D	12	23	96	myb-like HTH transcriptional regulator family protein		AT2G01060.1
Gorai.003G074700_A	1	2	1	protein kinase C-like zinc finger protein	GO:0045454,GO:0016209,GO:0016491,GO:0055114,GO:0047134	AT4G31240.1
Gorai.003G075300_D	1	2	1	Transducin/WD40 repeat-like superfamily protein	GO:0005515	AT1G64610.1
Gorai.003G075500_D	5	1	12	early nodulin-like protein 8	GO:0005507,GO:0009055	AT1G64640.1	AtENODL8,ENODL8
Gorai.003G075800_A	1	9	1	UBX domain-containing protein	GO:0005515	AT4G10790.1
Gorai.003G076000_D	2	4	2	Serine/threonine-protein kinase WNK (With No Lysine)-related		AT1G64625.2
Gorai.003G076800_D	9	2	29	Tetratricopeptide repeat (TPR)-like superfamily protein	GO:0045040,GO:0005742	AT5G41950.1
Gorai.003G079100_A	1	2	16			AT1G64405.1
Gorai.003G079100_D	9	2	4			AT1G64405.1
Gorai.003G079300_A	1	2	1	RING/U-box superfamily protein		AT5G53110.1
Gorai.003G080300_D	45	1	6	homolog of yeast oxidase assembly 1 (OXA1)	GO:0051205,GO:0016021	AT5G62050.1	ATOXA1,OXA1,OXA1AT
Gorai.003G080500_D	15	15	22	AMP-dependent synthetase and ligase family protein	GO:0003824,GO:0008152	AT4G23850.1	LACS4
Gorai.003G080800_A	2	1	2	glycosyl hydrolase 9C2	GO:0004553,GO:0005975,GO:0030246,GO:0005576	AT1G64390.1	AtGH9C2,GH9C2
Gorai.003G081400_D	8	9	4	Transmembrane amino acid transporter family protein		AT5G41800.1
Gorai.003G081500_A	2	1	5	TRICHOME BIREFRINGENCE-LIKE 23		AT4G11090.1	TBL23
Gorai.003G081500_D	2	1	2	TRICHOME BIREFRINGENCE-LIKE 23		AT4G11090.1	TBL23
Gorai.003G081800_D	5	16	18	myosin heavy chain-related		AT1G64320.1
Gorai.003G082000_D	1	2	1	BLISTER		AT3G23980.1	BLI,KOS1
Gorai.003G082500_A	1	2	1	ubiquitin-conjugating enzyme 10	GO:0016881	AT5G53300.1	UBC10
Gorai.003G082500_D	1	2	1	ubiquitin-conjugating enzyme 10	GO:0016881	AT5G53300.1	UBC10
Gorai.003G083100_A	12	2	14	cation/H+ exchanger 18	GO:0015299,GO:0006812,GO:0055085,GO:0016021	AT5G41610.1	ATCHX18,CHX18
Gorai.003G083300_A	24	2	9	cation/H+ exchanger 18	GO:0015299,GO:0006812,GO:0055085,GO:0016021	AT5G41610.1	ATCHX18,CHX18
Gorai.003G083600_A	1	2	1	Disease resistance-responsive (dirigent-like protein) family protein		AT4G23690.1
Gorai.003G085100_D	1	3	1	respiratory burst oxidase protein F	GO:0005506,GO:0009055,GO:0016491,GO:0050660,GO:0016021,GO:0055114,GO:0004601,GO:0050664	AT1G64060.1	ATRBOH F,ATRBOHF,RBOH F,RBOHAP108,RBOHF
Gorai.003G085300_A	2	1	2	Calcineurin-like metallo-phosphoesterase superfamily protein	GO:0016787	AT4G11240.1	TOPP7
Gorai.003G085300_D	21	1	2	Calcineurin-like metallo-phosphoesterase superfamily protein	GO:0016787	AT4G11240.1	TOPP7
Gorai.003G085500_A	6	2	18	WRKY family transcription factor	GO:0003700,GO:0043565,GO:0006355	AT4G23550.1	ATWRKY29,WRKY29
Gorai.003G085700_A	2	1	2			AT5G41560.1
Gorai.003G086000_A	2	1	2	Nucleolar GTP-binding protein	GO:0005525,GO:0015093,GO:0015684,GO:0016021	AT1G50920.1
Gorai.003G086000_D	2	1	2	Nucleolar GTP-binding protein	GO:0005525,GO:0015093,GO:0015684,GO:0016021	AT1G50920.1
Gorai.003G086300_D	21	1	2	Transmembrane amino acid transporter family protein		AT2G41190.1
Gorai.003G087500_A	1	7	82	Pentatricopeptide repeat (PPR) superfamily protein		AT1G71210.1
Gorai.003G088600_D	19	1	60	Calcineurin-like metallo-phosphoesterase superfamily protein	GO:0016787	AT3G03305.1
Gorai.003G088800_A	19	1	40
Gorai.003G088900_A	7	8	1	Plant protein 1589 of unknown function		AT3G10250.1
Gorai.003G089300_A	10	1	99	nuclear RNA polymerase A1	GO:0003677,GO:0003899,GO:0006351,GO:0008270,GO:0005634	AT3G57660.1	NRPA1
Gorai.003G089300_D	10	7	15	nuclear RNA polymerase A1	GO:0003677,GO:0003899,GO:0006351,GO:0008270,GO:0005634	AT3G57660.1	NRPA1
Gorai.003G089700_A	7	7	58	DNAJ heat shock N-terminal domain-containing protein	GO:0031072	AT5G27240.1
Gorai.003G089800_A	5	1	52	ABC-2 type transporter family protein	GO:0005524,GO:0016887,GO:0016020	AT5G06530.1
Gorai.003G090500_D	22	6	8	Glycosyltransferase family 61 protein	GO:0016757	AT2G41640.1
Gorai.003G091200_A	16	9	2	villin 2	GO:0003779,GO:0007010	AT2G41740.1	ATVLN2,VLN2
Gorai.003G091200_D	9	9	47	villin 2	GO:0003779,GO:0007010	AT2G41740.1	ATVLN2,VLN2
Gorai.003G091500_A	14	3	5	Integrase-type DNA-binding superfamily protein	GO:0003700,GO:0006355	AT2G41710.1
Gorai.003G091500_D	1	8	1	Integrase-type DNA-binding superfamily protein	GO:0003700,GO:0006355	AT2G41710.1
Gorai.003G091700_D	12	6	8	heat shock transcription factor B3	GO:0003700,GO:0043565,GO:0006355,GO:0005634	AT2G41690.1	AT-HSFB3,HSFB3
Gorai.003G091800_D	13	5	2	Protein of unknown function, DUF642		AT2G41810.1
Gorai.003G092500_A	24	4	7
Gorai.003G092800_A	27	13	35	ATP synthase subunit alpha	GO:0005524	ATCG00120.1
Gorai.003G093100_D	1	6	1	elongation factor family protein	GO:0003924,GO:0005525,GO:0007264,GO:0005622	AT5G13650.1
Gorai.003G093200_D	2	1	2	guanylate kinase	GO:0005515	AT3G57550.2	AGK2,GK-2
Gorai.003G094300_A	2	7	6	H(+)-ATPase 11	GO:0000166,GO:0046872,GO:0003824,GO:0008152,GO:0016020,GO:0015662,GO:0006812,GO:0006754	AT5G62670.1	AHA11,HA11
Gorai.003G094300_D	2	1	2	H(+)-ATPase 11	GO:0000166,GO:0046872,GO:0003824,GO:0008152,GO:0016020,GO:0015662,GO:0006812,GO:0006754	AT5G62670.1	AHA11,HA11
Gorai.003G094500_D	5	1	26	homeobox 1	GO:0003700,GO:0043565,GO:0006355,GO:0003677,GO:0005634	AT3G01470.1	ATHB-1,ATHB1,HAT5,HB-1,HD-ZIP-1
Gorai.003G094600_A	15	4	12	SPFH/Band 7/PHB domain-containing membrane-associated protein family	GO:0016020	AT5G62740.1	ATHIR1,HIR1
Gorai.003G095700_D	2	1	63	microtubule end binding protein EB1A	GO:0005515,GO:0008017	AT3G47690.1	ATEB1A,ATEB1H2,EB1A
Gorai.003G095800_A	6	2	1	HVA22 homologue A		AT1G74520.1	ATHVA22A,HVA22A
Gorai.003G096100_D	25	4	36	FAR1-related sequence 7	GO:0008270	AT3G06250.1	FRS7
Gorai.003G096300_D	2	1	11	NAP1-related protein 2	GO:0006334,GO:0005634	AT1G18800.1	NRP2
Gorai.003G096500_A	10	1	11	NAP1-related protein 2	GO:0006334,GO:0005634	AT1G18800.1	NRP2
Gorai.003G096800_D	29	6	29	enoyl-CoA hydratase/isomerase D	GO:0003824,GO:0008152	AT1G60550.1	DHNS,ECHID
Gorai.003G097600_A	2	1	2	Pyridine nucleotide-disulphide oxidoreductase family protein	GO:0050660,GO:0008033,GO:0016491,GO:0055114	AT1G74470.1
Gorai.003G098600_A	17	3	33	Protein kinase superfamily protein	GO:0004672,GO:0005524,GO:0006468	AT1G18670.1	IBS1
Gorai.003G098600_D	13	28	2	Protein kinase superfamily protein	GO:0004672,GO:0005524,GO:0006468	AT1G18670.1	IBS1
Gorai.003G099300_D	7	7	1	Plant protein of unknown function (DUF863)		AT1G69360.1
Gorai.003G099500_D	15	21	12	basic helix-loop-helix (bHLH) DNA-binding superfamily protein	GO:0030528,GO:0006355	AT4G00050.1	UNE10
Gorai.003G100300_A	8	6	3	LYR family of Fe/S cluster biogenesis protein		AT5G61220.1
Gorai.003G100500_A	1	2	1			AT1G26580.1
Gorai.003G100500_D	1	2	1			AT1G26580.1
Gorai.003G100800_D	11	1	2	Mitochondrial glycoprotein family protein	GO:0005759	AT4G32605.1
Gorai.003G101000_D	1	2	1	glucan endo-1,3-beta-glucosidase-like protein 3		AT5G08000.1	E13L3,PDCB2
Gorai.003G101800_A	8	9	2			AT5G08060.1
Gorai.003G103000_A	14	3	5	AGAMOUS-like 8	GO:0003677,GO:0046983,GO:0003700,GO:0006355,GO:0005634,GO:0043565	AT5G60910.1	AGL8,FUL
Gorai.003G103100_A	2	1	2	OBF binding protein 4	GO:0003677,GO:0008270,GO:0006355	AT5G60850.1	OBP4
Gorai.003G103200_A	2	1	2	Sterile alpha motif (SAM) domain-containing protein	GO:0005515	AT5G23680.1
Gorai.003G103300_D	11	1	2	O-fucosyltransferase family protein		AT5G15740.1
Gorai.003G104000_D	15	5	12	RING/U-box superfamily protein		AT5G08139.1
Gorai.003G104500_D	2	1	86	RNA polymerase I subunit 43	GO:0003899,GO:0046983,GO:0006351	AT1G60620.1	ATRPAC43,RPAC43
Gorai.003G104800_A	16	5	2
Gorai.003G104900_D	10	1	21	Ribosomal protein L7Ae/L30e/S12e/Gadd45 family protein		AT5G08180.1
Gorai.003G105400_A	11	1	47			AT3G12300.1
Gorai.003G105400_D	11	1	49			AT3G12300.1
Gorai.003G106400_D	3	2	1	ATP binding microtubule motor family protein	GO:0003777,GO:0005524,GO:0007018	AT1G18550.1
Gorai.003G106600_D	2	7	6	P-loop containing nucleoside triphosphate hydrolases superfamily protein	GO:0003676,GO:0005524,GO:0008026,GO:0004386	AT3G18600.1
Gorai.003G106700_A	16	2	2	Plant protein of unknown function (DUF868)		AT4G12690.1
Gorai.003G107100_D	1	2	1	Calcineurin-like metallo-phosphoesterase superfamily protein	GO:0016787	AT4G24730.1
Gorai.003G107200_D	11	1	2	cytochrome P450, family 71, subfamily A, polypeptide 22	GO:0005506,GO:0009055,GO:0016705,GO:0020037,GO:0055114	AT3G48310.1	CYP71A22
Gorai.003G107700_A	3	3	1	31-kDa RNA binding protein	GO:0003676	AT4G24770.1	ATRBP31,ATRBP33,CP31,RBP31
Gorai.003G108000_A	1	6	1	Leucine-rich repeat protein kinase family protein	GO:0004672,GO:0005524,GO:0006468,GO:0005515	AT2G31880.1	EVR,SOBIR1
Gorai.003G108100_A	1	2	1	Transducin/WD40 repeat-like superfamily protein	GO:0005515	AT1G24530.1
Gorai.003G108200_A	1	2	1	Cysteine proteinases superfamily protein	GO:0008234,GO:0006508	AT5G50260.1
Gorai.003G108300_A	2	1	2	Pectin lyase-like superfamily protein		AT4G24780.1
Gorai.003G108400_A	7	3	1	hydroxyproline-rich glycoprotein family protein	GO:0003676,GO:0001104,GO:0006357,GO:0016592,GO:0016455	AT5G02850.1
Gorai.003G108400_D	7	11	1	hydroxyproline-rich glycoprotein family protein	GO:0003676,GO:0001104,GO:0006357,GO:0016592,GO:0016455	AT5G02850.1
Gorai.003G109200_A	1	2	13	Xanthine/uracil permease family protein	GO:0005215,GO:0006810,GO:0055085,GO:0016020,GO:0016021	AT5G50300.1	ATAZG2,AZG2
Gorai.003G109800_D	2	1	2	Calmodulin binding protein-like		AT5G62570.2
Gorai.003G112000_A	2	1	2	VEFS-Box of polycomb protein		AT5G51230.1	AtEMF2,CYR1,EMF2,VEF2
Gorai.003G112000_D	19	1	54	VEFS-Box of polycomb protein		AT5G51230.1	AtEMF2,CYR1,EMF2,VEF2
Gorai.003G112200_D	20	6	51	Integrase-type DNA-binding superfamily protein	GO:0003700,GO:0006355	AT5G51190.1
Gorai.003G112300_D	16	5	2	alpha/beta-Hydrolases superfamily protein		AT5G51180.1
Gorai.003G113000_A	12	6	6	RNI-like superfamily protein		AT5G07670.1
Gorai.003G113000_D	10	1	84	RNI-like superfamily protein		AT5G07670.1
Gorai.003G113800_D	10	1	11	BCL-2-associated athanogene 7		AT5G62390.1	ATBAG7,BAG7
Gorai.003G114000_A	2	21	2	Glycosyl hydrolases family 32 protein	GO:0004564,GO:0004575	AT1G12240.1	ATBETAFRUCT4,VAC-INV
Gorai.003G114300_D	2	1	21	Plant invertase/pectin methylesterase inhibitor superfamily	GO:0030599,GO:0042545,GO:0005618,GO:0004857	AT2G45220.1
Gorai.003G115000_A	1	2	91	RAB GTPase homolog E1B	GO:0003924,GO:0005525,GO:0006414,GO:0005622,GO:0003746	AT4G20360.1	ATRAB8D,ATRABE1B,RABE1b
Gorai.003G115100_A	2	5	2	P-loop containing nucleoside triphosphate hydrolases superfamily protein	GO:0005524	AT4G24710.1
Gorai.003G115600_D	2	1	2	Protein kinase superfamily protein	GO:0004672,GO:0005524,GO:0006468	AT5G50180.1
Gorai.003G116300_D	2	1	5	basic helix-loop-helix (bHLH) DNA-binding superfamily protein	GO:0030528,GO:0006355	AT3G26744.1	ATICE1,ICE1,SCRM
Gorai.003G116400_D	7	7	10	Pentatricopeptide repeat (PPR) superfamily protein		AT5G61990.1
Gorai.003G116500_D	25	8	4	ARF-GAP domain 1	GO:0005515,GO:0005543,GO:0008060,GO:0008270,GO:0032312,GO:0005737	AT5G61980.1	AGD1
Gorai.003G116600_A	38	8	12	Glycosyl hydrolase family 38 protein	GO:0004559,GO:0005975,GO:0015923,GO:0006013,GO:0004553,GO:0008270	AT5G13980.1
Gorai.003G117500_D	2	1	2	Mitochondrial substrate carrier family protein		AT5G51050.1
Gorai.003G117700_D	5	4	2	TUDOR-SN protein 1	GO:0003676,GO:0016788	AT5G07350.1	AtTudor1,TSN1,Tudor1
Gorai.003G118300_D	4	4	92			AT5G41110.1
Gorai.003G118400_A	21	1	5	Protein kinase superfamily protein	GO:0004672,GO:0005524,GO:0006468	AT5G50860.1
Gorai.003G118900_A	14	1	13
Gorai.003G118900_D	1	2	1
Gorai.003G119100_A	8	2	16	glutamate-1-semialdehyde 2,1-aminomutase 2	GO:0008483,GO:0030170	AT3G48730.1	GSA2
Gorai.003G119200_A	9	2	1	Ubiquitin family protein	GO:0005515	AT4G24990.1	ATGP4
Gorai.003G120100_D	2	1	2		GO:0005515	AT5G63520.1
Gorai.003G120300_A	12	23	29	Protein of unknown function (DUF 3339)		AT3G48660.1
Gorai.003G120400_A	9	2	1	CBS / octicosapeptide/Phox/Bemp1 (PB1) domains-containing protein	GO:0005515	AT5G50530.1
Gorai.003G120600_D	2	1	5	Serine/threonine-protein kinase Rio1	GO:0003824,GO:0005524	AT5G37350.1
Gorai.003G121000_A	2	1	2	FAR1-related sequence 3		AT2G27110.3	FRS3
Gorai.003G121000_D	13	1	11	FAR1-related sequence 3		AT2G27110.3	FRS3
Gorai.003G121100_D	20	1	9	purple acid phosphatase 27	GO:0016787	AT5G50400.1	ATPAP27,PAP27
Gorai.003G121300_D	25	7	23	Ribosomal L38e protein family	GO:0003735,GO:0006412,GO:0005622,GO:0005840	AT3G59540.1
Gorai.003G122000_D	2	1	2	Transducin/WD40 repeat-like superfamily protein	GO:0005515	AT5G53500.1
Gorai.003G122300_D	20	6	57
Gorai.003G122500_A	2	1	2	F-box family protein	GO:0005515	AT5G45360.1
Gorai.003G122600_A	6	6	8	P-loop containing nucleoside triphosphate hydrolases superfamily protein	GO:0005524	AT2G46620.1
Gorai.003G123000_A	12	0	10	non-specific phospholipase C1	GO:0016788	AT1G07230.1	NPC1
Gorai.003G123300_D	1	2	13	Quinone reductase family protein	GO:0010181,GO:0016491,GO:0009055,GO:0050662	AT5G58800.1
Gorai.003G124100_A	1	23	1	josephin protein-related		AT1G07300.1
Gorai.003G124100_D	1	3	1	josephin protein-related		AT1G07300.1
Gorai.003G124300_A	7	7	1	thiaminC	GO:0009228	AT2G29630.1	PY,THIC
Gorai.003G124400_D	7	8	1	FTSH protease 7	GO:0005524,GO:0004222,GO:0006508,GO:0008270,GO:0016021	AT3G47060.1	ftsh7
Gorai.003G124800_A	1	2	1	Thioesterase superfamily protein		AT2G29590.1
Gorai.003G124800_D	1	2	3	Thioesterase superfamily protein		AT2G29590.1
Gorai.003G125400_A	13	7	2	Neutral/alkaline non-lysosomal ceramidase		AT1G07380.1
Gorai.003G125400_D	13	3	5	Neutral/alkaline non-lysosomal ceramidase		AT1G07380.1
Gorai.003G125500_A	2	4	7	cytochrome P450, family 87, subfamily A, polypeptide 2	GO:0005506,GO:0009055,GO:0016705,GO:0020037,GO:0055114	AT1G12740.1	CYP87A2
Gorai.003G125500_D	2	1	2	cytochrome P450, family 87, subfamily A, polypeptide 2	GO:0005506,GO:0009055,GO:0016705,GO:0020037,GO:0055114	AT1G12740.1	CYP87A2
Gorai.003G125700_A	7	7	10
Gorai.003G126400_D	4	7	2	RNApolymerase 14 kDa subunit	GO:0003899,GO:0046983,GO:0006351	AT2G29540.1	ATRPAC14,ATRPC14,RPC14
Gorai.003G126500_D	2	1	7	Tim10/DDP family zinc finger protein	GO:0006626,GO:0045039,GO:0042719	AT2G29530.1	TIM10
Gorai.003G126700_A	10	1	33	Protein of unknown function (DUF3527)		AT5G59020.1
Gorai.003G126700_D	10	1	5	Protein of unknown function (DUF3527)		AT5G59020.1
Gorai.003G127300_A	1	15	3	Adenine nucleotide alpha hydrolases-like superfamily protein	GO:0006950	AT3G53990.1
Gorai.003G128200_A	1	2	1	Cation efflux family protein	GO:0008324,GO:0006812,GO:0055085,GO:0016021	AT3G61940.1	ATMTPA1,MTPA1
Gorai.003G128200_D	1	2	1	Cation efflux family protein	GO:0008324,GO:0006812,GO:0055085,GO:0016021	AT3G61940.1	ATMTPA1,MTPA1
Gorai.003G128800_D	2	1	2	sterol 4-alpha-methyl-oxidase 2-1	GO:0005506,GO:0016491,GO:0006633,GO:0055114	AT1G07420.1	ATSMO2,SMO2-1
Gorai.003G128900_D	1	2	1	highly ABA-induced PP2C gene 2	GO:0003824	AT1G07430.1	HAI2
Gorai.003G129200_A	2	7	6	pumilio 2	GO:0003723	AT2G29190.1	APUM2,PUM2
Gorai.003G129200_D	2	1	2	pumilio 2	GO:0003723	AT2G29190.1	APUM2,PUM2
Gorai.003G129300_A	1	2	10	zinc finger (C3HC4-type RING finger) family protein		AT3G46620.1
Gorai.003G129300_D	1	9	1	zinc finger (C3HC4-type RING finger) family protein		AT3G46620.1
Gorai.003G129400_D	1	2	1	RING/U-box superfamily protein		AT3G55530.1	SDIR1
Gorai.003G130200_D	1	2	16	Ubiquitin fusion degradation UFD1 family protein	GO:0006511	AT2G29070.2
Gorai.003G130700_D	2	1	2	TRF-like 2		AT1G07540.1	TRFL2
Gorai.003G130800_D	2	1	2	Rab5-interacting family protein		AT5G59410.1
Gorai.003G131000_A	2	1	2	expansin A4		AT2G39700.1	ATEXP4,ATEXPA4,ATHEXP ALPHA 1.6,EXPA4
Gorai.003G131300_A	20	2	16			AT3G18790.1
Gorai.003G131600_A	4	4	7	protein kinase 1B	GO:0004672,GO:0005524,GO:0006468	AT2G28930.3	APK1B,PK1B
Gorai.003G131700_A	5	1	29	beta-ketoacyl reductase 1	GO:0016491,GO:0008152	AT1G67730.1	ATKCR1,KCR1,YBR159
Gorai.003G132600_D	6	2	20			AT5G02420.1
Gorai.003G133100_A	2	1	2	plant U-box 13	GO:0005515,GO:0004842,GO:0016567,GO:0000151	AT3G46510.1	ATPUB13,PUB13
Gorai.003G133200_A	1	3	1	OBF-binding protein 3	GO:0003677,GO:0008270,GO:0006355	AT3G55370.2	OBP3
Gorai.003G133300_A	7	7	24	P-loop containing nucleoside triphosphate hydrolases superfamily protein	GO:0003924,GO:0005525,GO:0042254,GO:0005634	AT1G06720.1
Gorai.003G133500_A	2	7	21			AT1G47278.2
Gorai.003G134000_D	2	1	2	63 kDa inner membrane family protein	GO:0051205,GO:0016021	AT2G28800.1	ALB3
Gorai.003G134400_A	9	2	3	ubiquitin carrier protein 7	GO:0016881	AT5G59300.1	ATUBC7,UBC7
Gorai.003G134400_D	1	15	19	ubiquitin carrier protein 7	GO:0016881	AT5G59300.1	ATUBC7,UBC7
Gorai.003G135100_A	1	2	1			AT5G59960.1
Gorai.003G135200_D	1	8	1	RNA-binding (RRM/RBD/RNP motifs) family protein	GO:0003676	AT5G59950.5
Gorai.003G136300_D	6	3	13	Domain of unknown function (DUF966)		AT5G59790.1
Gorai.003G136800_A	2	5	2	ribosomal protein L23AB	GO:0003735,GO:0006412,GO:0005840,GO:0005622	AT3G55280.1	RPL23AB
Gorai.003G137100_D	7	1	1	RmlC-like cupins superfamily protein	GO:0045735	AT2G28680.1
Gorai.003G137400_A	38	1	2	Ribosomal L29 family protein	GO:0003735,GO:0006412,GO:0005622,GO:0005840	AT5G02610.1
Gorai.003G137700_A	2	1	2	hercules receptor kinase 1	GO:0004672,GO:0005524,GO:0006468	AT3G46290.1	HERK1
Gorai.003G137700_D	2	1	2	hercules receptor kinase 1	GO:0004672,GO:0005524,GO:0006468	AT3G46290.1	HERK1
Gorai.003G139100_A	21	7	11	nuclear RNA polymerase C1	GO:0003677,GO:0003899,GO:0006351,GO:0032549,GO:0008270,GO:0005634	AT5G60040.1	NRPC1
Gorai.003G139100_D	21	4	6	nuclear RNA polymerase C1	GO:0003677,GO:0003899,GO:0006351,GO:0032549,GO:0008270,GO:0005634	AT5G60040.1	NRPC1
Gorai.003G139200_D	2	7	2	BTB/POZ domain-containing protein		AT5G60050.1
Gorai.003G140000_D	19	1	5	Glyceraldehyde-3-phosphate dehydrogenase-like family protein	GO:0006520,GO:0055114	AT5G21060.1
Gorai.003G140200_A	11	5	2	Ribosomal protein L7Ae/L30e/S12e/Gadd45 family protein	GO:0006412,GO:0005840,GO:0005622,GO:0003735	AT1G36240.1
Gorai.003G140600_A	12	3	1	Ethylene insensitive 3 family protein	GO:0005634,GO:0030528	AT3G20770.1	AtEIN3,EIN3
Gorai.003G140700_A	1	2	1	Leucine-rich repeat (LRR) family protein	GO:0005515	AT5G21090.1
Gorai.003G140800_D	9	2	10	LA RNA-binding protein		AT5G21160.1
Gorai.003G141700_A	11	5	2	Ribosomal protein L11 family protein	GO:0003735,GO:0006412,GO:0005840	AT5G60670.1
Gorai.003G141700_D	2	5	2	Ribosomal protein L11 family protein	GO:0003735,GO:0006412,GO:0005840	AT5G60670.1
Gorai.003G141900_D	10	1	2	SAND family protein		AT2G28390.1
Gorai.003G142100_D	21	12	6	Tetratricopeptide repeat (TPR)-like superfamily protein		AT1G10330.1
Gorai.003G142500_D	1	3	1	auxin response factor 10	GO:0006355,GO:0005634,GO:0003677,GO:0009725	AT2G28350.1	ARF10
Gorai.003G142600_D	1	2	1	GATA transcription factor 11	GO:0003700,GO:0008270,GO:0043565,GO:0006355	AT1G08010.1	GATA11
Gorai.003G142900_A	1	2	3	Nucleotide/sugar transporter family protein	GO:0016020	AT2G28315.1
Gorai.003G143000_D	1	6	50	Protein of unknown function (DUF707)		AT2G28310.1
Gorai.003G143900_A	1	2	1	P-loop containing nucleoside triphosphate hydrolases superfamily protein		AT5G60760.1
Gorai.003G143900_D	3	2	1	P-loop containing nucleoside triphosphate hydrolases superfamily protein		AT5G60760.1
Gorai.003G144400_A	10	1	11	ABC-2 type transporter family protein	GO:0005524,GO:0016887,GO:0016020	AT2G28070.1
Gorai.003G144400_D	12	12	1	ABC-2 type transporter family protein	GO:0005524,GO:0016887,GO:0016020	AT2G28070.1
Gorai.003G144500_A	1	2	16	UDP-Glycosyltransferase superfamily protein	GO:0016758,GO:0008152	AT2G28080.1
Gorai.003G144500_D	6	2	7	UDP-Glycosyltransferase superfamily protein	GO:0016758,GO:0008152	AT2G28080.1
Gorai.003G144800_D	14	3	11	Heavy metal transport/detoxification superfamily protein	GO:0046872,GO:0030001	AT5G60800.1
Gorai.003G145500_D	1	2	1	SNF7 family protein	GO:0015031	AT5G22950.1	VPS24.1
Gorai.003G146000_A	16	5	22	DNA ligase 1	GO:0003910,GO:0005524,GO:0006281,GO:0006310,GO:0003677	AT1G08130.1	ATLIG1,LIG1
Gorai.003G146700_D	2	12	2	Kinase interacting (KIP1-like) family protein		AT2G30500.1
Gorai.003G146800_D	1	14	1			AT1G07120.1
Gorai.003G147500_D	12	7	7	Phosphatidate cytidylyltransferase family protein	GO:0016772,GO:0016020	AT5G58560.1
Gorai.003G148000_A	3	3	1	Glutaredoxin family protein	GO:0009055,GO:0015035,GO:0045454	AT5G58530.1
Gorai.003G149000_A	9	2	20	Thioredoxin superfamily protein		AT1G07080.1
Gorai.003G149000_D	9	2	19	Thioredoxin superfamily protein		AT1G07080.1
Gorai.003G149700_D	2	1	2	Mitochondrial substrate carrier family protein		AT1G07030.1
Gorai.003G150300_A	8	2	53	sorting nexin 2A	GO:0005515,GO:0035091,GO:0007154	AT5G58440.1	SNX2a
Gorai.003G150700_A	6	2	8	WRKY DNA-binding protein 33	GO:0003700,GO:0043565,GO:0006355	AT2G38470.1	ATWRKY33,WRKY33
Gorai.003G151600_A	1	2	16	GCN5L1 family protein		AT2G30330.1
Gorai.003G151700_A	1	2	16	Peroxidase superfamily protein	GO:0004601,GO:0020037,GO:0006979,GO:0055114	AT5G05340.1
Gorai.003G152300_A	1	2	1	SOS3-interacting protein 4	GO:0004672,GO:0005524,GO:0006468,GO:0003824,GO:0007165	AT2G30360.1	CIPK11,PKS5,SIP4,SNRK3.22
Gorai.003G152300_D	1	2	19	SOS3-interacting protein 4	GO:0004672,GO:0005524,GO:0006468,GO:0003824,GO:0007165	AT2G30360.1	CIPK11,PKS5,SIP4,SNRK3.22
Gorai.003G153100_A	1	6	1	ABC transporter of the mitochondrion 3	GO:0005524,GO:0016887,GO:0042626,GO:0006810,GO:0055085,GO:0016021	AT5G58270.1	ATATM3,ATM3,STA1
Gorai.003G153300_D	20	16	9	radical SAM domain-containing protein / GCN5-related N-acetyltransferase (GNAT) family protein	GO:0008080,GO:0008152	AT5G50320.1	AtELP3,ELO3,ELP3,HAC8,HAG3
Gorai.003G153900_A	2	1	32	Protein of unknown function (DUF1639)		AT1G55340.1
Gorai.003G153900_D	2	1	2	Protein of unknown function (DUF1639)		AT1G55340.1
Gorai.003G154200_A	8	9	3	Pyruvate kinase family protein	GO:0000287,GO:0004743,GO:0030955,GO:0006096	AT5G56350.1
Gorai.003G154600_D	6	2	15	purin-rich alpha 1		AT2G32080.1	PUR ALPHA-1
Gorai.003G155000_D	3	11	1	Protein of unknown function (DUF581)		AT5G20700.1
Gorai.003G155100_A	1	6	1	acetyl Co-enzyme a carboxylase biotin carboxylase subunit	GO:0003824,GO:0008152,GO:0016874,GO:0005524,GO:0008716	AT5G35360.1	CAC2
Gorai.003G155400_A	1	2	1	myb domain protein 103	GO:0003677	AT1G63910.1	AtMYB103,MYB103
Gorai.003G155400_D	1	2	1	myb domain protein 103	GO:0003677	AT1G63910.1	AtMYB103,MYB103
Gorai.003G155500_A	8	2	21	RNA binding Plectin/S10 domain-containing protein		AT5G52650.1
Gorai.003G155500_D	15	9	27	RNA binding Plectin/S10 domain-containing protein		AT5G52650.1
Gorai.003G156000_D	1	2	1	POX (plant homeobox) family protein	GO:0003700,GO:0043565,GO:0006355,GO:0003677,GO:0005634	AT5G41410.1	BEL1
Gorai.003G156300_A	27	2	3
Gorai.003G156400_D	9	13	3
Gorai.003G156600_A	27	6	35
Gorai.003G156600_D	27	2	3
Gorai.003G156900_D	11	10	2	homolog of xeroderma pigmentosum complementation group B 1	GO:0003676,GO:0004386,GO:0005524,GO:0003677,GO:0016787	AT5G41370.1	ATXPB1,XPB1
Gorai.003G157500_D	2	1	2	hydroxyproline-rich glycoprotein family protein		AT5G52430.1
Gorai.003G157900_D	14	1	62	Putative thiol-disulphide oxidoreductase DCC		AT5G50100.1
Gorai.003G158300_A	2	1	11	acid-amino acid ligases;ligases;ATP binding;ATP binding;ligases	GO:0005524,GO:0009058,GO:0016874	AT1G63680.1	ATMURE,MURE,PDE316
Gorai.003G158400_D	2	1	2	GMP synthase (glutamine-hydrolyzing), putative / glutamine amidotransferase, putative	GO:0004066,GO:0006529,GO:0003922,GO:0005524,GO:0006164,GO:0006177,GO:0016787,GO:0006541	AT1G63660.1
Gorai.003G159100_A	1	2	1	beta-6 tubulin	GO:0051258,GO:0043234,GO:0003924,GO:0005525,GO:0006184,GO:0007017,GO:0005874	AT5G12250.1	TUB6
Gorai.003G159600_A	4	12	50	Leucine-rich repeat protein kinase family protein	GO:0004672,GO:0005524,GO:0006468,GO:0005515	AT1G63430.1
Gorai.003G160900_A	21	4	11	Protein of unknown function (DUF810)		AT4G11670.1
Gorai.003G161000_D	7	11	1	Zinc finger, C3HC4 type (RING finger) family protein		AT4G11680.1
Gorai.003G161100_A	2	1	11	replication factor C 2	GO:0005524,GO:0016851,GO:0015979,GO:0015995,GO:0004386,GO:0009378,GO:0006281,GO:0006310,GO:0006260,GO:0005663,GO:0003689	AT1G63160.1	RFC2
Gorai.003G161200_D	0	1	3	RHOMBOID-like 2	GO:0004252,GO:0016021,GO:0006508	AT1G63120.1	ATRBL2,RBL2
Gorai.003G162800_D	15	3	25	Pleckstrin homology (PH) domain superfamily protein	GO:0046907	AT4G11790.1
Gorai.003G163200_A	2	1	2	hydroxymethylglutaryl-CoA synthase / HMG-CoA synthase / 3-hydroxy-3-methylglutaryl coenzyme A synthase	GO:0004421,GO:0008299	AT4G11820.2	EMB2778,FKP1,HMGS,MVA1
Gorai.003G164800_D	1	2	1	SNARE associated Golgi protein family		AT1G12450.1
Gorai.003G165500_A	5	1	5	cytochrome P450, family 706, subfamily A, polypeptide 6	GO:0005506,GO:0009055,GO:0016705,GO:0020037,GO:0055114	AT4G12320.1	CYP706A6
Gorai.003G165600_A	2	1	2	cytochrome P450, family 706, subfamily A, polypeptide 6	GO:0005506,GO:0009055,GO:0016705,GO:0020037,GO:0055114	AT4G12320.1	CYP706A6
Gorai.003G165800_A	6	2	1	cytochrome P450, family 706, subfamily A, polypeptide 6	GO:0005506,GO:0009055,GO:0016705,GO:0020037,GO:0055114	AT4G12320.1	CYP706A6
Gorai.003G165800_D	2	1	2	cytochrome P450, family 706, subfamily A, polypeptide 6	GO:0005506,GO:0009055,GO:0016705,GO:0020037,GO:0055114	AT4G12320.1	CYP706A6
Gorai.003G166100_A	5	12	2	cytochrome P450, family 706, subfamily A, polypeptide 6	GO:0005506,GO:0009055,GO:0016705,GO:0020037,GO:0055114	AT4G12320.1	CYP706A6
Gorai.003G167300_D	1	2	10	Double Clp-N motif protein	GO:0019538	AT4G12060.1
Gorai.003G167400_A	22	2	56	MATE efflux family protein	GO:0015238,GO:0015297,GO:0006855,GO:0055085,GO:0016020	AT4G22790.1
Gorai.003G167400_D	14	2	22	MATE efflux family protein	GO:0015238,GO:0015297,GO:0006855,GO:0055085,GO:0016020	AT4G22790.1
Gorai.003G167800_D	1	2	1	A20/AN1-like zinc finger family protein	GO:0008270,GO:0003677	AT1G12440.1
Gorai.003G168000_A	16	10	26	copper ion binding		AT4G12340.1
Gorai.003G168700_D	1	2	16	Plant invertase/pectin methylesterase inhibitor superfamily protein	GO:0004857,GO:0030599	AT5G62360.1
Gorai.003G168800_A	45	5	6	Terpenoid synthases superfamily protein	GO:0016740,GO:0009058	AT1G62730.1
Gorai.003G170000_A	11	1	32	Flavin-binding monooxygenase family protein	GO:0004499,GO:0050660,GO:0050661,GO:0055114,GO:0009055,GO:0016491	AT1G62620.1
Gorai.003G170200_A	19	1	5	OSBP(oxysterol binding protein)-related protein 2A	GO:0005515,GO:0005543	AT4G22540.1	ORP2A
Gorai.003G170300_A	1	2	4	nitrate transporter 1.1	GO:0005215,GO:0006857,GO:0016020	AT1G12110.1	ATNRT1,B-1,CHL1,CHL1-1,NRT1,NRT1.1
Gorai.003G170600_D	15	2	12	Ubiquitin-like superfamily protein	GO:0000045,GO:0005737	AT4G16520.1	ATG8F
Gorai.003G171300_A	1	3	1
Gorai.003G174500_D	12	6	15	Disease resistance protein (TIR-NBS-LRR class) family	GO:0043531,GO:0005515,GO:0007165,GO:0005622,GO:0045087,GO:0031224,GO:0004888,GO:0006915,GO:0005524	AT5G36930.2
Gorai.003G177200_D	17	3	14
Gorai.003G177300_D	10	7	6	Ribosomal protein L19 family protein	GO:0003735,GO:0006412,GO:0005622,GO:0005840	AT4G17560.1
Gorai.003G177400_A	8	2	92	Plant VAMP (vesicle-associated membrane protein) family protein	GO:0005198	AT5G47180.1
Gorai.003G177500_D	10	7	17	GATA transcription factor 26	GO:0003700,GO:0008270,GO:0043565,GO:0006355,GO:0005634,GO:0005737	AT4G17570.3	GATA26
Gorai.003G177600_A	5	1	2	COP9 signalosome, subunit CSN8		AT4G14110.1	COP9,CSN8,EMB143,FUS7
Gorai.003G177800_A	2	32	2			AT3G01680.1
Gorai.003G177900_A	5	1	2			AT3G01680.1
Gorai.003G178000_A	6	3	20			AT3G01680.1
Gorai.003G179200_D	15	4	12	pleckstrin homology (PH) domain-containing protein		AT4G17140.3
Gorai.003G179300_D	14	12	5	Protein of unknown function (DUF581)		AT5G47060.1
Gorai.003G179700_D	22	2	13	Plant invertase/pectin methylesterase inhibitor superfamily protein	GO:0004857,GO:0030599	AT5G46930.1
Gorai.003G180000_A	5	4	2		GO:0005639	AT5G46560.1
Gorai.003G180400_D	34	24	2	glycine decarboxylase complex H	GO:0006546,GO:0005960	AT2G35370.1	GDCH
Gorai.003G180700_D	7	18	10	RING/U-box superfamily protein		AT2G35330.1
Gorai.003G182100_D	1	2	1	Basic helix-loop-helix (bHLH) DNA-binding family protein	GO:0030528,GO:0006355	AT4G17880.1
Gorai.003G182300_A	11	5	2	DNA binding;DNA-directed RNA polymerases	GO:0003677,GO:0003899,GO:0006351,GO:0005634	AT3G13940.1
Gorai.003G183800_A	2	1	2	P-glycoprotein 2	GO:0005524,GO:0016887,GO:0042626,GO:0006810,GO:0055085,GO:0016021	AT4G25960.1	PGP2
Gorai.003G184100_A	20	2	79	Syntaxin/t-SNARE family protein	GO:0016020,GO:0005515	AT5G46860.1	ATSYP22,ATVAM3,SGR3,SYP22,VAM3
Gorai.003G184200_A	20	6	9	RNA-binding (RRM/RBD/RNP motifs) family protein	GO:0003676,GO:0055114,GO:0016491	AT4G17720.1
Gorai.003G184300_D	13	1	2	Ribosomal protein L25/Gln-tRNA synthetase, anti-codon-binding domain	GO:0003735,GO:0008097,GO:0006412,GO:0005622,GO:0005840	AT4G23620.1
Gorai.003G185200_A	28	1	4	Transcription factor jumonji (jmj) family protein / zinc finger (C5HC2 type) family protein	GO:0005515,GO:0005634	AT5G46910.1
Gorai.003G185300_A	2	1	2	las1-like family protein		AT5G12220.1
Gorai.003G185400_D	2	7	2	Defender against death (DAD family) protein	GO:0016021	AT1G32210.1	ATDAD1
Gorai.003G185600_D	1	2	10	Protein of unknown function (DUF760)		AT1G32160.1
Gorai.003G185800_A	1	11	1	Transcription elongation factor (TFIIS) family protein	GO:0003677,GO:0006351,GO:0005634,GO:0030528	AT1G32130.1	ATIWS1,IWS1
Gorai.003G186100_A	21	1	5	signal recognition particle binding	GO:0003924,GO:0005525,GO:0000166,GO:0005634,GO:0005737,GO:0007264,GO:0005622	AT5G05670.1
Gorai.003G186100_D	2	1	11	signal recognition particle binding	GO:0003924,GO:0005525,GO:0000166,GO:0005634,GO:0005737,GO:0007264,GO:0005622	AT5G05670.1
Gorai.003G186200_A	10	7	2	Proteasome component (PCI) domain protein	GO:0005515	AT5G45620.1
Gorai.003G186200_D	10	7	11	Proteasome component (PCI) domain protein	GO:0005515	AT5G45620.1
Gorai.003G186500_A	1	2	3	SCAMP family protein	GO:0015031,GO:0016021	AT1G32050.1
Gorai.003G186600_A	2	1	57	phosphoribulokinase	GO:0005524,GO:0016301,GO:0008152	AT1G32060.1	PRK
Gorai.003G186900_A	9	2	49	ENHANCED DISEASE RESISTANCE 2		AT4G19040.1	EDR2
Gorai.003G186900_D	8	2	3	ENHANCED DISEASE RESISTANCE 2		AT4G19040.1	EDR2
Gorai.003G187200_A	10	1	9			AT4G19140.1
Gorai.004G000300_A	27	13	35	S-adenosyl-L-methionine-dependent methyltransferases superfamily protein		AT5G14600.1
Gorai.004G000600_A	5	4	67			AT2G30480.3
Gorai.004G000600_D	5	4	67			AT2G30480.3
Gorai.004G000700_D	9	2	10	TRAM, LAG1 and CLN8 (TLC) lipid-sensing domain containing protein	GO:0016021	AT4G10360.1
Gorai.004G000800_D	2	1	6	Protein of unknown function (DUF607)		AT1G09575.1
Gorai.004G000900_A	8	2	3	nodulin MtN21 /EamA-like transporter family protein	GO:0016020	AT1G06890.1
Gorai.004G000900_D	9	2	3	nodulin MtN21 /EamA-like transporter family protein	GO:0016020	AT1G06890.1
Gorai.004G001300_D	6	2	101	Protein of unknown function, DUF584		AT5G60680.1
Gorai.004G001700_A	32	10	49			AT5G21070.1
Gorai.004G002100_A	9	2	12	related to AP2.7	GO:0003700,GO:0006355	AT2G28550.3	RAP2.7,TOE1
Gorai.004G002100_D	9	6	65	related to AP2.7	GO:0003700,GO:0006355	AT2G28550.3	RAP2.7,TOE1
Gorai.004G002500_D	1	2	1	Subtilase family protein	GO:0004252,GO:0006508,GO:0042802,GO:0043086	AT3G46850.1
Gorai.004G003200_D	7	1	17	hercules receptor kinase 1	GO:0004672,GO:0005524,GO:0006468	AT3G46290.1	HERK1
Gorai.004G003600_D	1	2	1	Ankyrin repeat family protein	GO:0005515	AT1G07710.1
Gorai.004G004400_A	17	3	14			AT5G59960.1
Gorai.004G004900_A	16	9	21	actin 3		AT3G53750.1	ACT3
Gorai.004G004900_D	8	2	21	actin 3		AT3G53750.1	ACT3
Gorai.004G006600_A	1	2	20	Nucleotide-sugar transporter family protein	GO:0016020,GO:0055085	AT3G11320.1
Gorai.004G007000_D	6	2	15	Tetratricopeptide repeat (TPR)-like superfamily protein		AT3G47080.1
Gorai.004G007100_A	13	6	2	cation exchanger 3	GO:0055085,GO:0016021	AT3G51860.1	ATCAX3,ATHCX1,CAX1-LIKE,CAX3
Gorai.004G007100_D	13	6	2	cation exchanger 3	GO:0055085,GO:0016021	AT3G51860.1	ATCAX3,ATHCX1,CAX1-LIKE,CAX3
Gorai.004G007900_D	3	8	1	vacuolar protein sorting 41	GO:0005515,GO:0006886,GO:0016192	AT1G08190.1	ATVAM2,ATVPS41,VAM2,VPS41,ZIP2
Gorai.004G008200_A	2	1	2	arogenate dehydratase 6	GO:0004664,GO:0009094	AT1G08250.1	ADT6
Gorai.004G008200_D	1	7	20	arogenate dehydratase 6	GO:0004664,GO:0009094	AT1G08250.1	ADT6
Gorai.004G008700_D	16	5	26	cytochrome-c oxidases;electron carriers	GO:0004129,GO:0009055,GO:0005746	AT4G21105.1
Gorai.004G008900_A	2	5	2	60S acidic ribosomal protein family	GO:0003735,GO:0006414,GO:0005622,GO:0005840	AT3G44590.1
Gorai.004G009300_A	7	8	13	homolog of histone chaperone HIRA	GO:0005515,GO:0006355,GO:0005634,GO:0030528	AT3G44530.2	HIRA
Gorai.004G009300_D	7	7	24	homolog of histone chaperone HIRA	GO:0005515,GO:0006355,GO:0005634,GO:0030528	AT3G44530.2	HIRA
Gorai.004G009700_D	7	8	1			AT5G22450.1
Gorai.004G010000_D	10	1	25	RNA-binding (RRM/RBD/RNP motifs) family protein	GO:0003676	AT3G52660.1
Gorai.004G010500_A	2	1	7	Ribosomal protein S11 family protein	GO:0003735,GO:0006412,GO:0005622,GO:0005840	AT3G11510.1
Gorai.004G010600_D	13	1	9	vesicle-associated membrane protein 714	GO:0016192,GO:0016021	AT5G22360.1	ATVAMP714,VAMP714
[truncated: 8,028 more rows]
