# Supplementary material
Source: publisher figshare collection journal article supplement (https://gsajournals.figshare.com/articles/dataset/_/12268739)
Supplement: Supplementary file 1 [file 1]

ME0 grey, P=0.3844

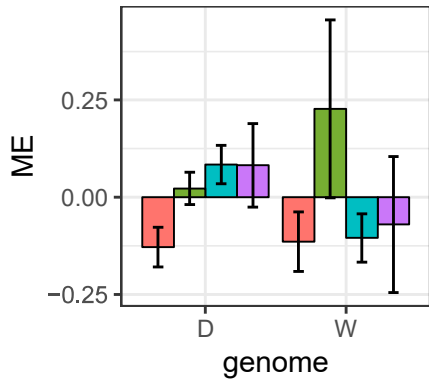

ME1 turquoise, P=0

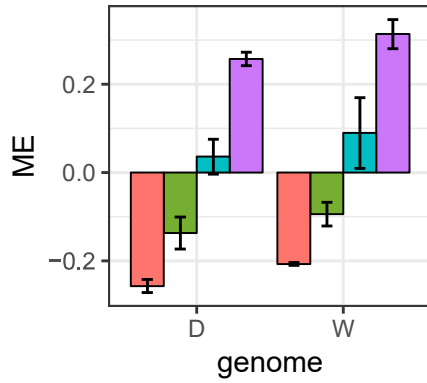

ME2 blue, P=0

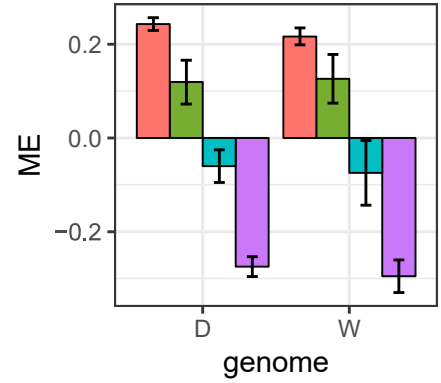

ME3 brown, P=0

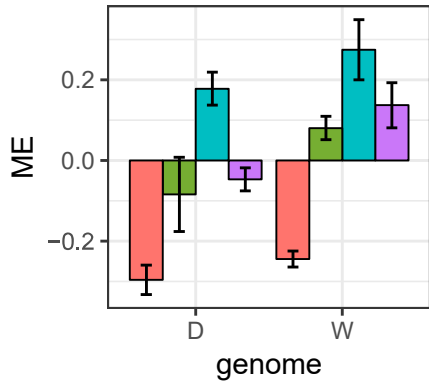

ME4 yellow, P=0.0527

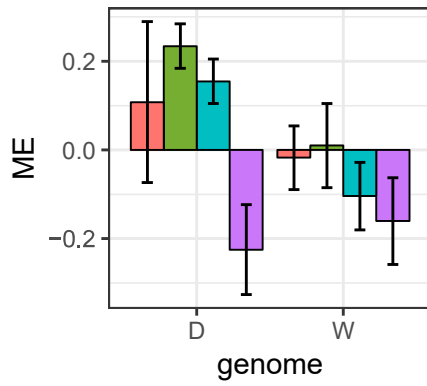

ME5 green, P=0

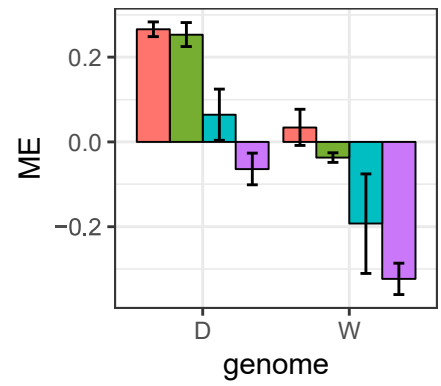

ME6 red, P=0

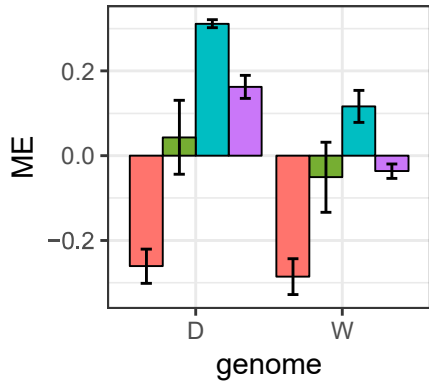

ME7 black, P=0.0317

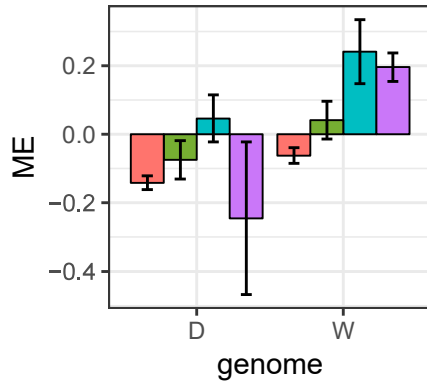

ME8 pink, P=0

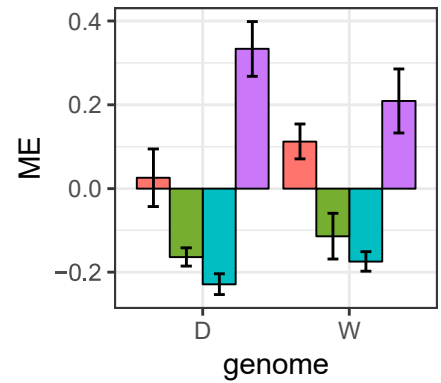

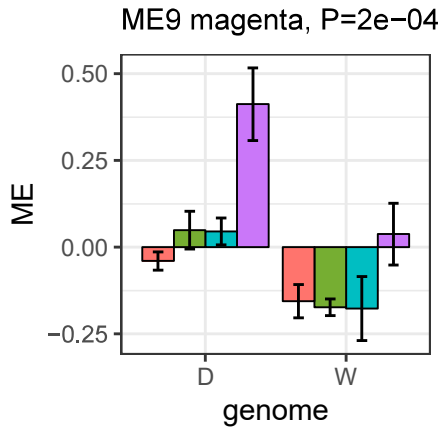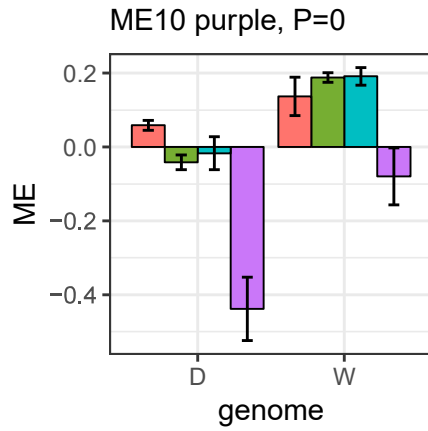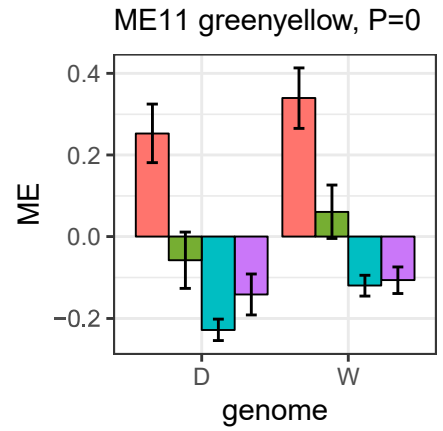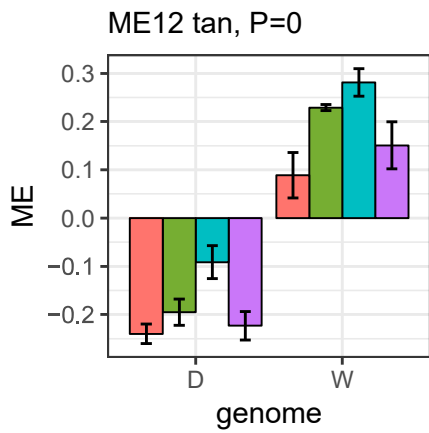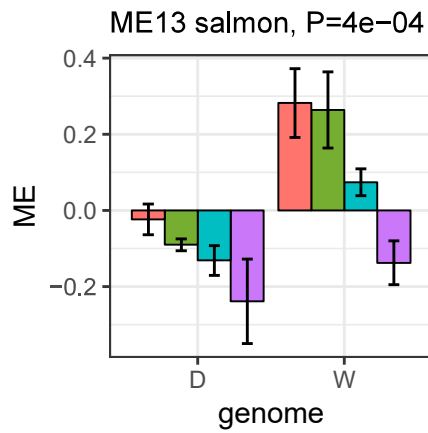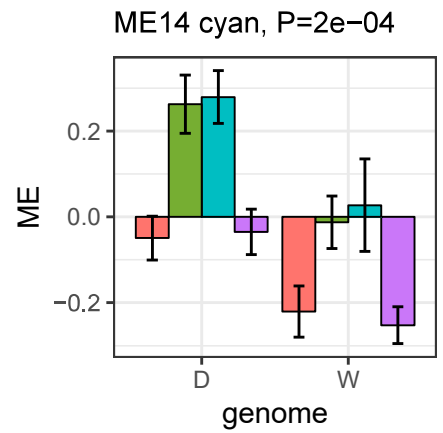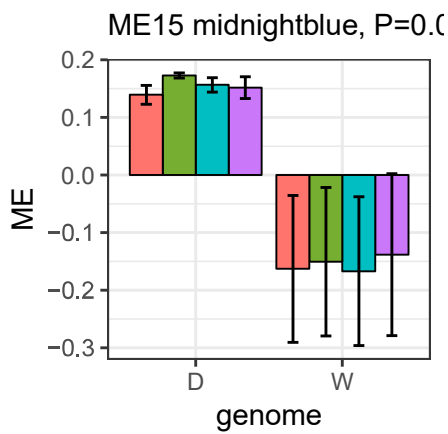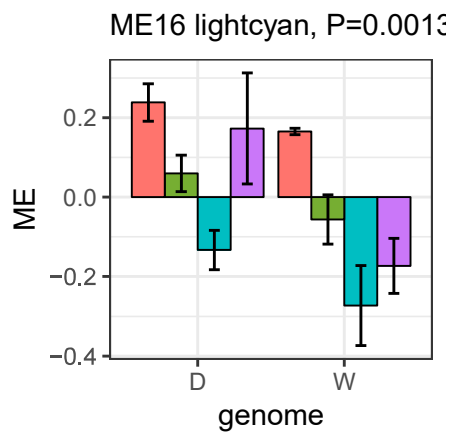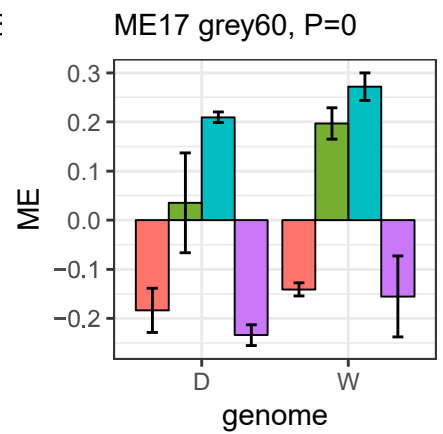

ME18 lightgreen, P=0.003

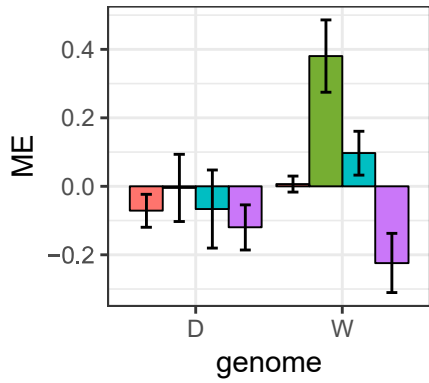

ME19 lightyellow, P=0.036

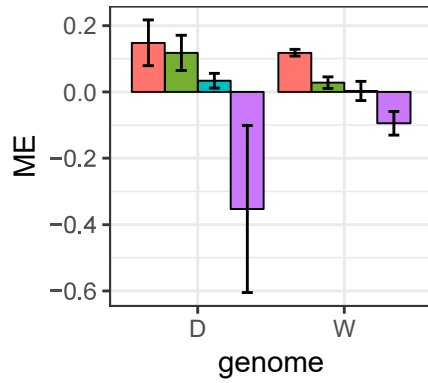

ME20 royalblue, P=0.135

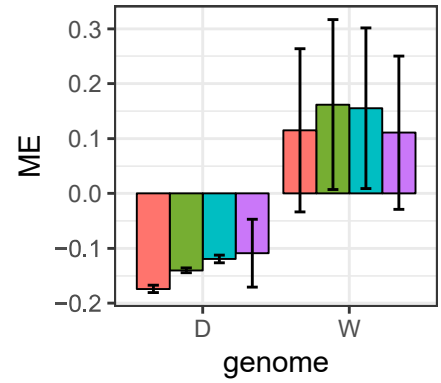

ME21 darkred, P=0

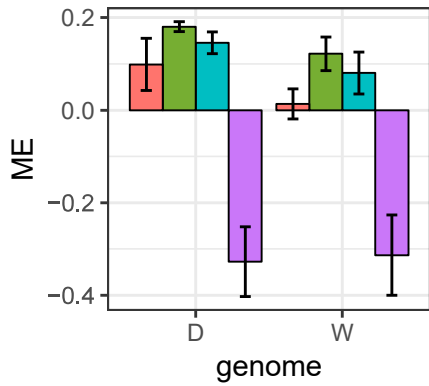

ME22 darkgreen, P=0.240

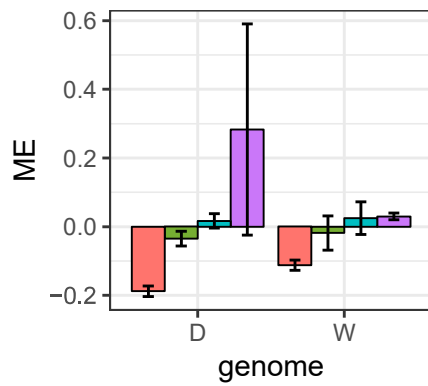

ME23 darkturquoise, P=0.0

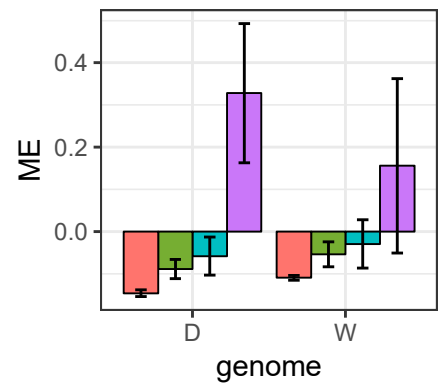

ME24 darkgrey, P=0.6761

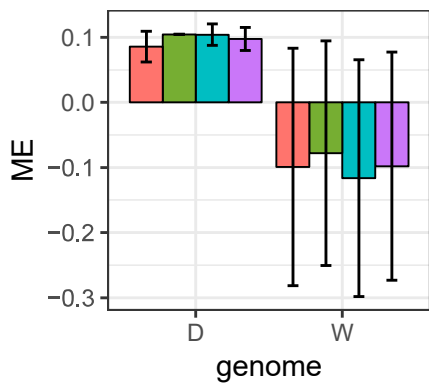

ME25 orange, P=0

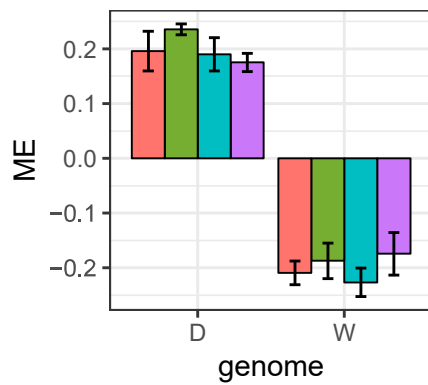

ME26 darkorange, P=0.70

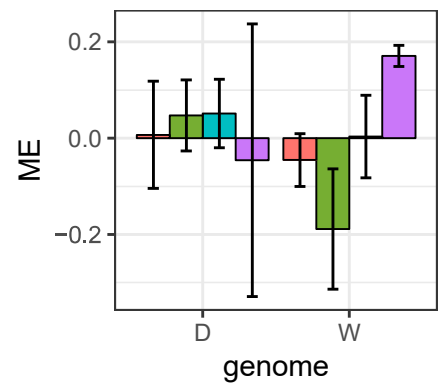

ME27 white, P=0.1099

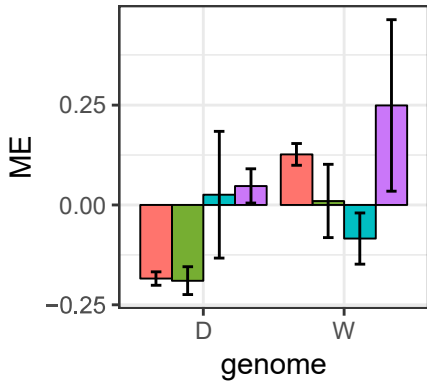

ME28 skyblue, P=8e-04

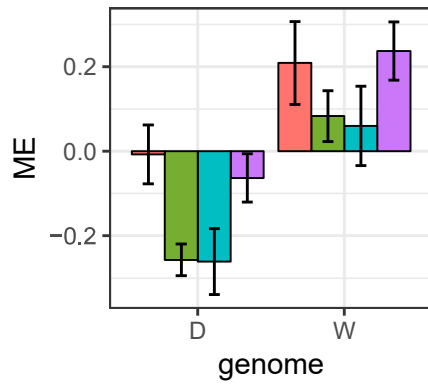

ME29 saddlebrown, P=0.7

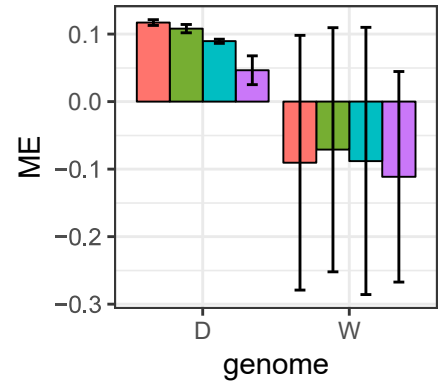

ME30 steelblue, P=0.2626

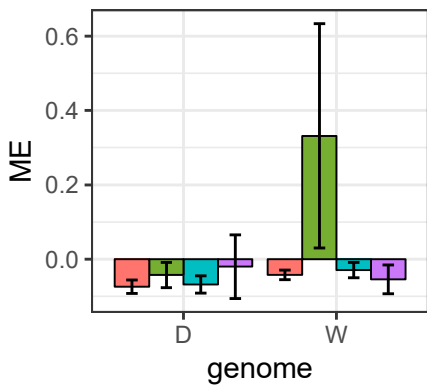

ME31 paleturquoise, P=0.

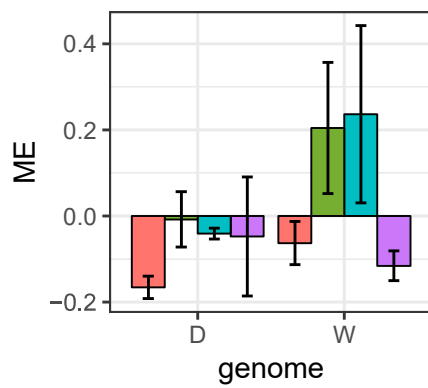

ME32 violet, P=0.148

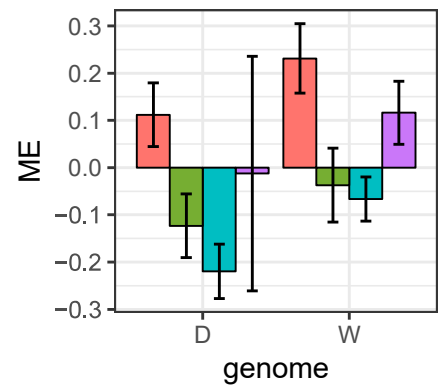

ME33 darkolivegreen, P=

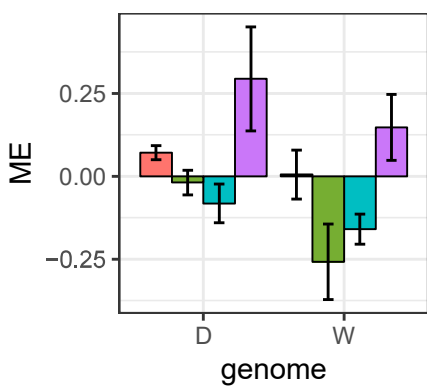

ME34 darkmagenta, P=0.

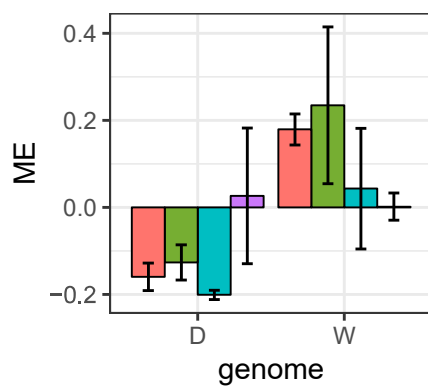

ME35 sienna3, P=0.7332

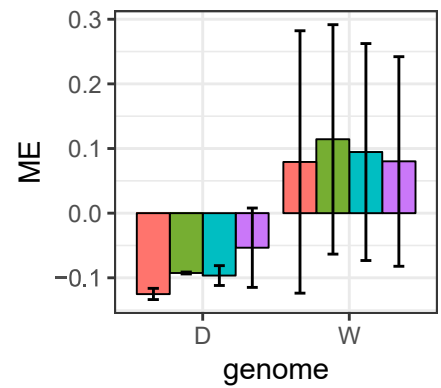

ME36 yellowgreen, P=0.6

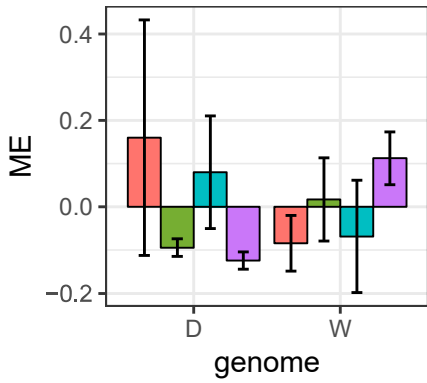

ME37 skyblue3, P=0.0019

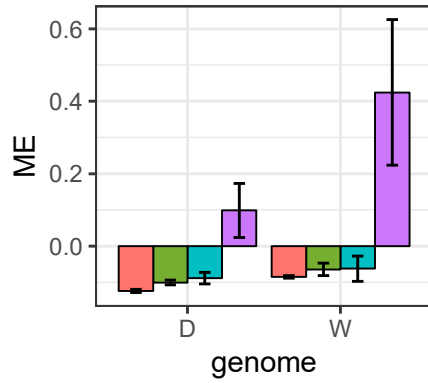

ME38 plum1, P=0.7879

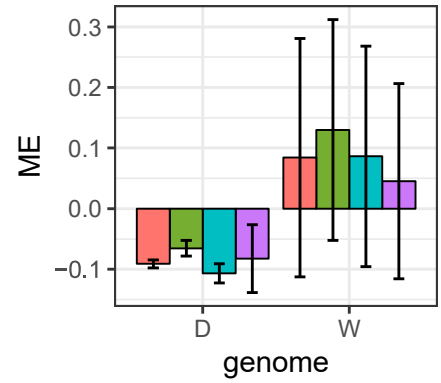

ME39 orangered4, P=0.40

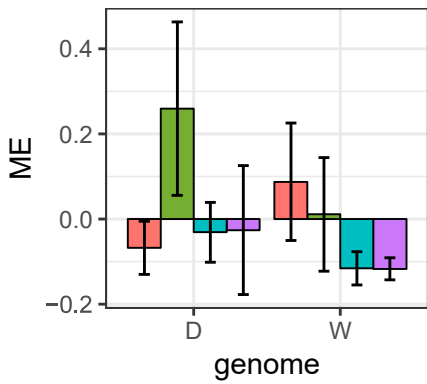

ME40 mediumpurple3, P=

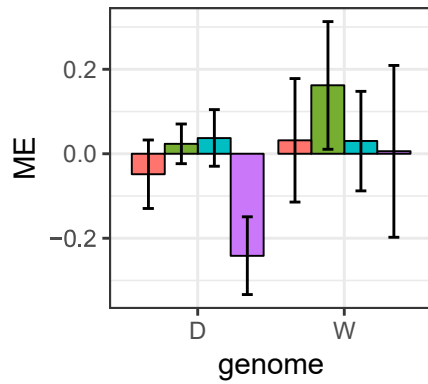

ME41 lightsteelblue1, P=8

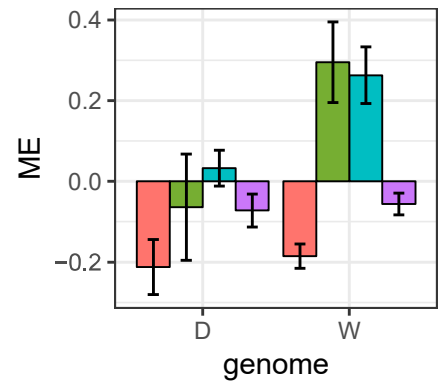

ME42 lightcyan1, P=0.634

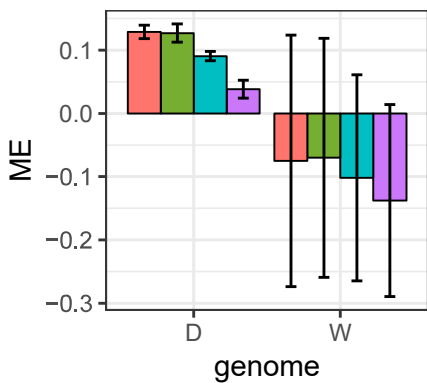

ME43 ivory, P=0.7524

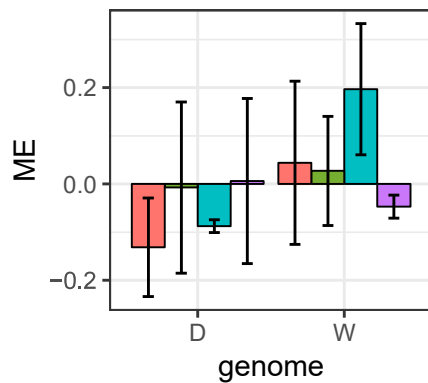

ME44 floralwhite, P=4e-0

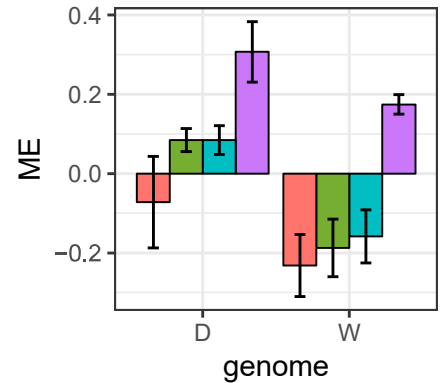

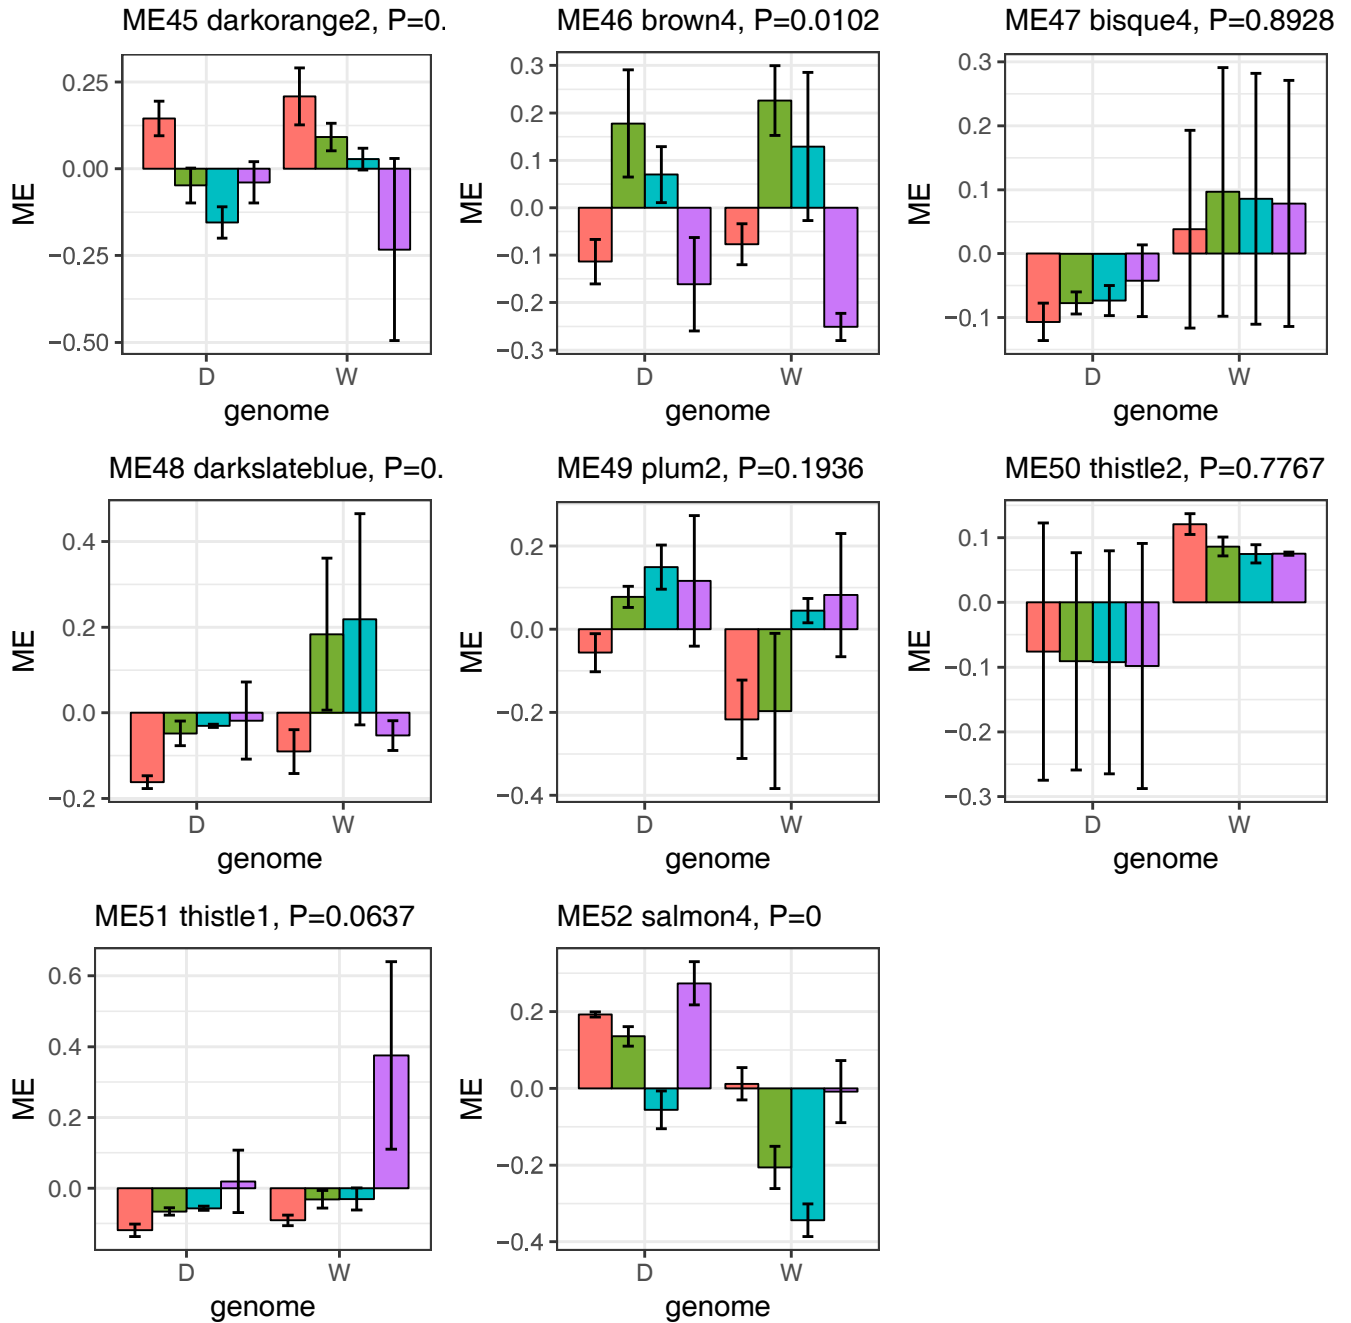

**Figure S3.** Average module eigengene values from the homoeologous fiber network across developmental timespoints for wild and domesticated fiber. Generalized expression patterns for the genes within each module are represented by the MEs. Developmental stages: red = 5 dpa, green = 10 dpa, blue = 15 dpa, purple = 20 dpa.
