# Supplementary material
Source: publisher figshare collection journal article supplement (https://gsajournals.figshare.com/articles/dataset/_/12268739)
Supplement: Supplementary file 2 [file 1]

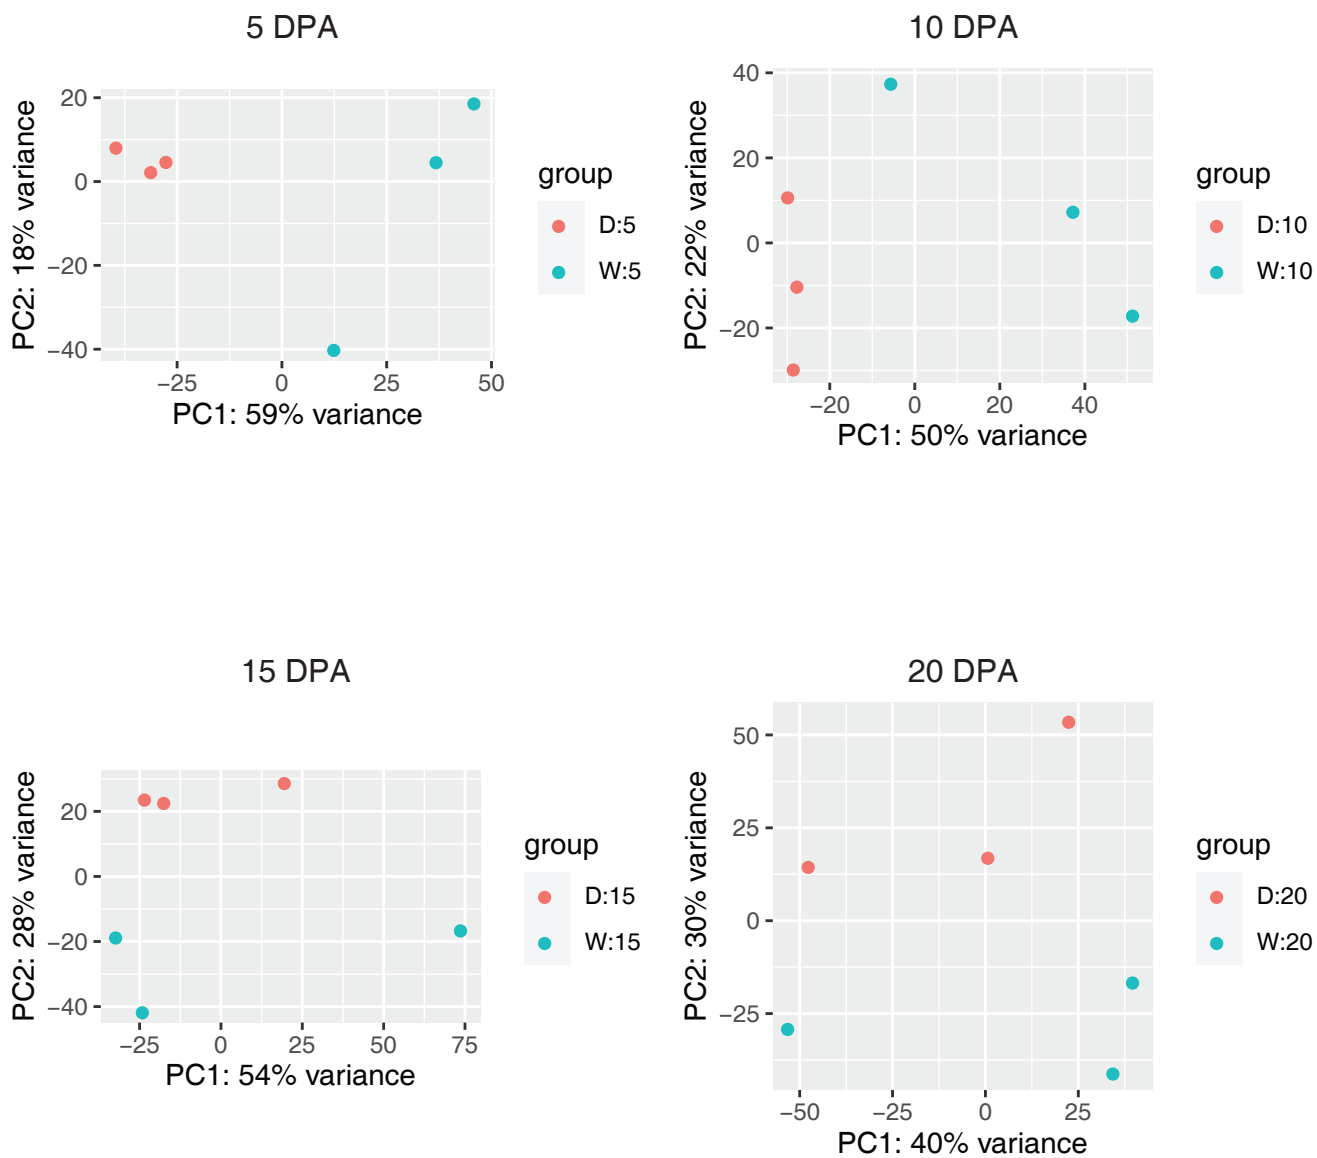

Figure S1: Principal components analysis (PCA) of RNA-seq libraries by timepoint (days post anthesis; DPA). red, domesticated fiber samples; blue; wild fiber samples.
