# Supplementary material
Source: publisher figshare collection journal article supplement (https://gsajournals.figshare.com/articles/dataset/_/12268739)
Supplement: Supplementary file 3 [file 1]

# Correspondence of wild and domesticated modules in partitioned data set

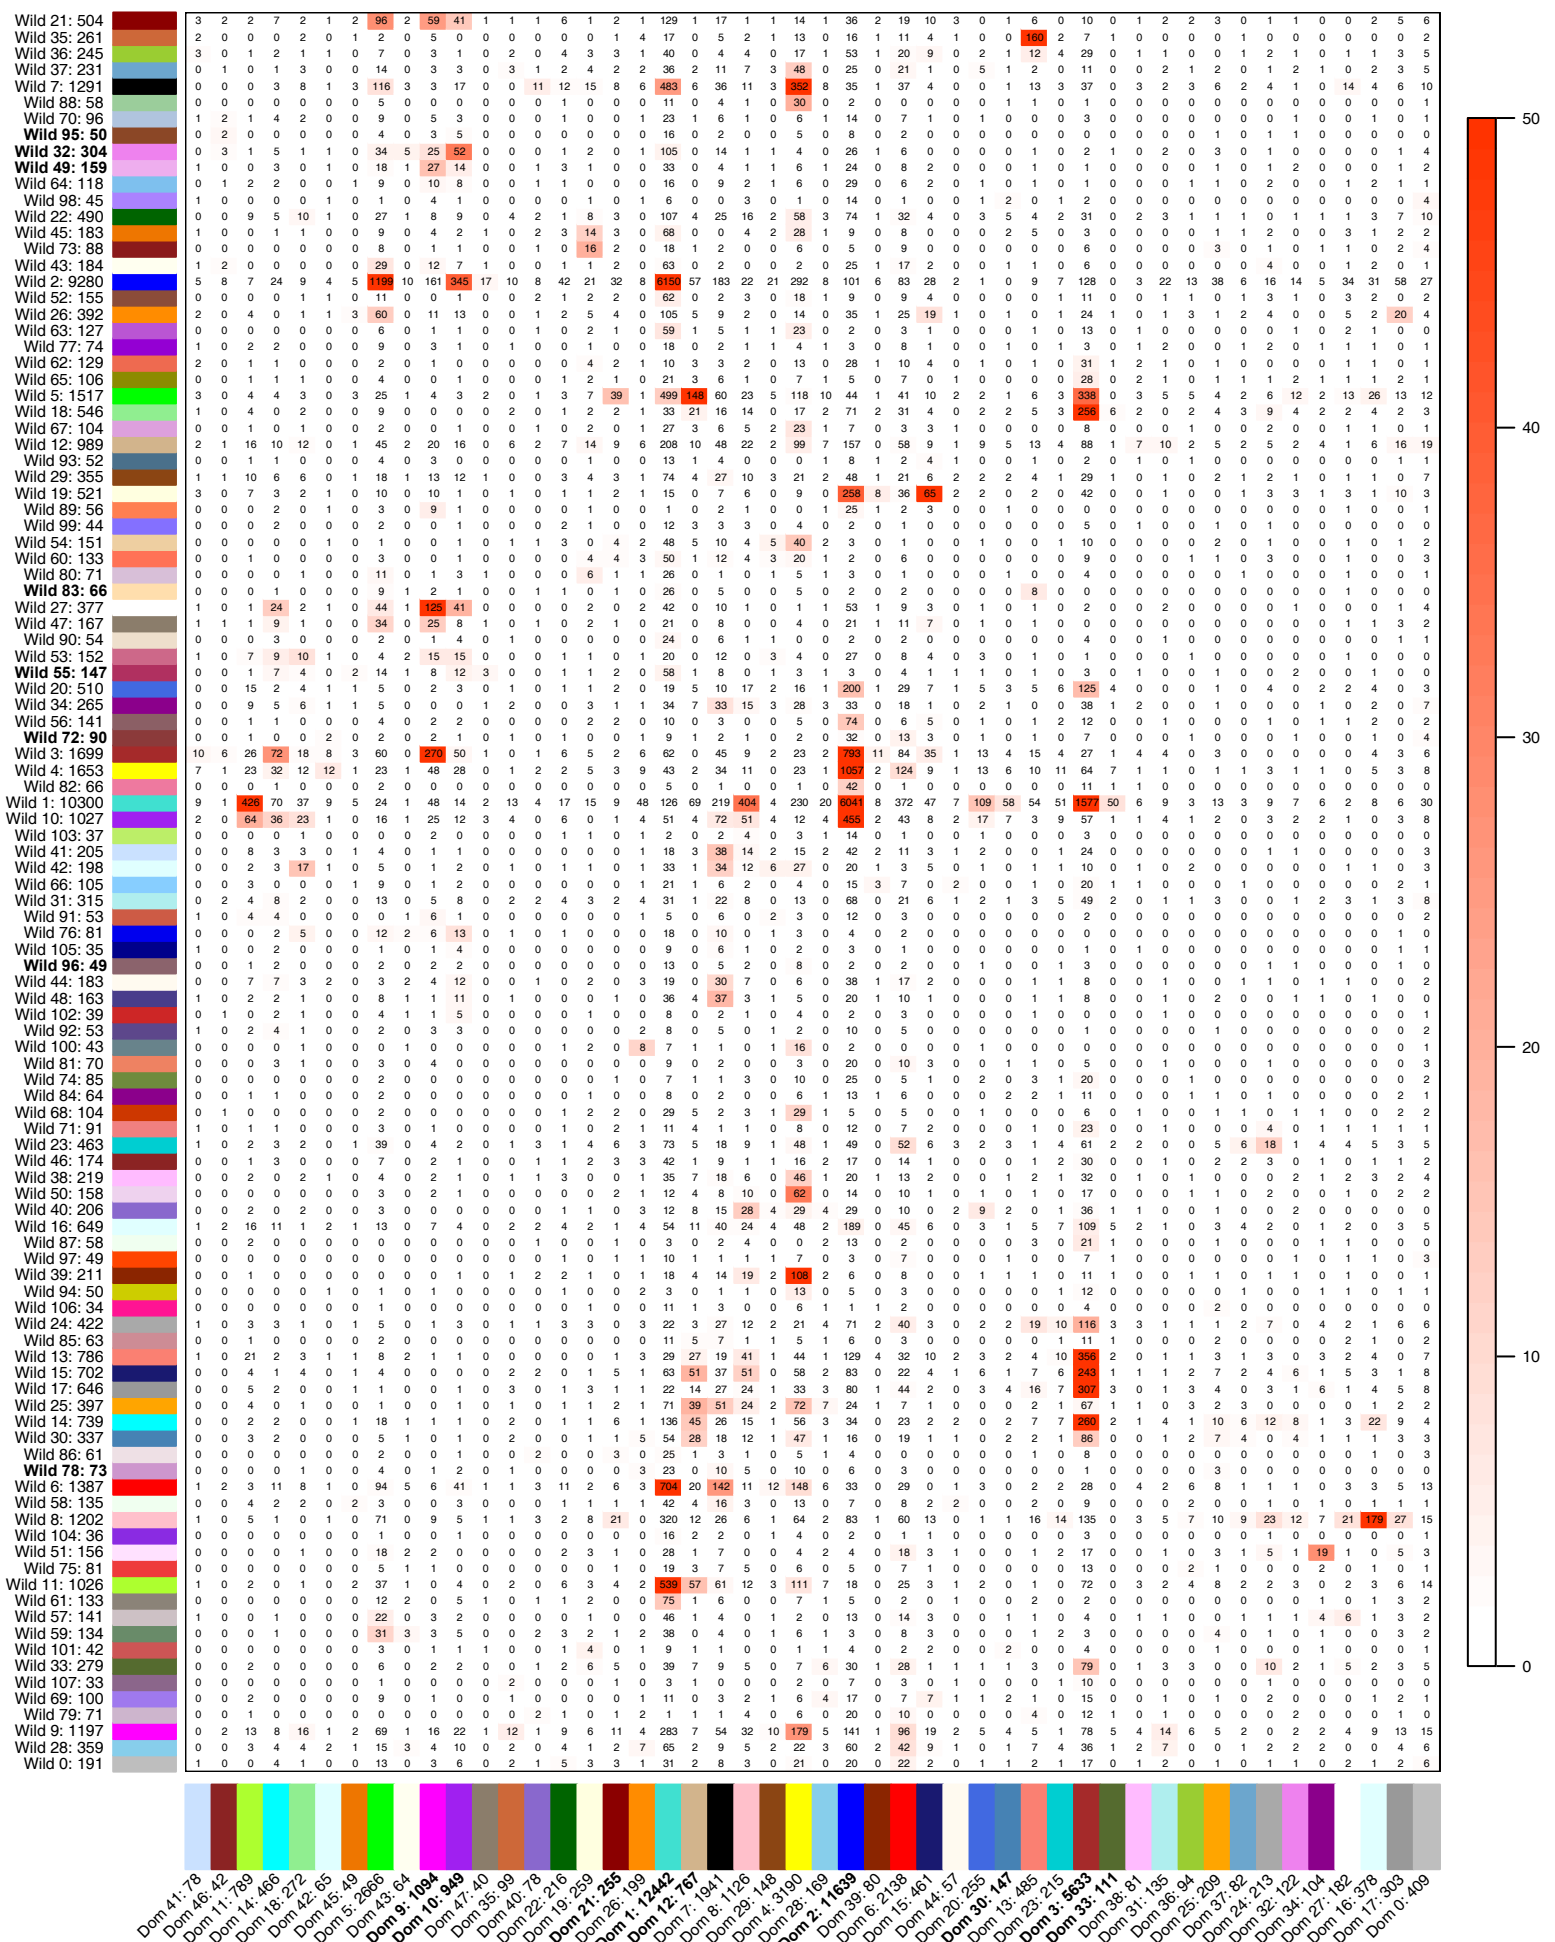

**Fig. S4.** Correspondence analysis between domesticated and wild homoeologous fiber coexpression network. Numbers in cells show the number of overlapping genes between a given wild network module and a given domestication network module. Bold modules are significantly associated with fiber development (ANOVA,  $P < 0.05$ ). Red cells have a higher overlap of genes than white or pink cells.
